# Supplementary material for: Extending the Salinilactone Family
Source: PubMed Central journal article supplement — Chembiochem. 2020 Mar 10;21(11):1629–32. doi: 10.1002/cbic.201900764 (PMC7317194; doi:10.1002/cbic.201900764), 2020-03-10
Supplement: CBIC-21-1629-s001.pdf [file CBIC-21-1629-s001.pdf]

# CHEMBIOCHEM

## Supporting Information

### **Extending the Salinilactone Family**

Christian Schlawis,<sup>[a]</sup> Tim Harig,<sup>[a]</sup> Stephanie Ehlers,<sup>[a]</sup> Dulce G. Guillen-Matus,<sup>[b]</sup>  
Kaitlin E. Creamer,<sup>[b]</sup> Paul R. Jensen,<sup>[b]</sup> and Stefan Schulz\*<sup>[a]</sup>

cbic\_201900764\_sm\_miscellaneous\_information.pdf

## SUPPORTING INFORMATION

**Abstract:** Five new members of the salinilactone family, salinilactones D-H, are reported. These bicyclic lactones are produced by *Salinispora* bacteria and display extended or shortened alkyl side chains compared to the recently reported salinilactones A-C. They were identified by GC/MS, gas chromatographic retention index and comparison with synthetic samples. We further investigated the occurrence of salinilactones across six newly proposed *Salinispora* species to gain insight into how compound production varies among taxa. The growth inhibiting effect of this compound family on multiple biological systems including non-*Salinispora* actinomycetes were analyzed. Additionally, we found strong evidence for significant cytotoxicity of the title compounds.

**Table of Contents**

|                                                       |    |
|-------------------------------------------------------|----|
| Part 1: Compound Overview .....                       | 3  |
| Part 2: Bioassays / Species and Spt9 phylogenies..... | 5  |
| Part 3: Experimental Procedures .....                 | 9  |
| Part 4: NMR Spectra .....                             | 17 |
| Part 5: References .....                              | 47 |

## SUPPORTING INFORMATION

## Part 1: Compound Overview

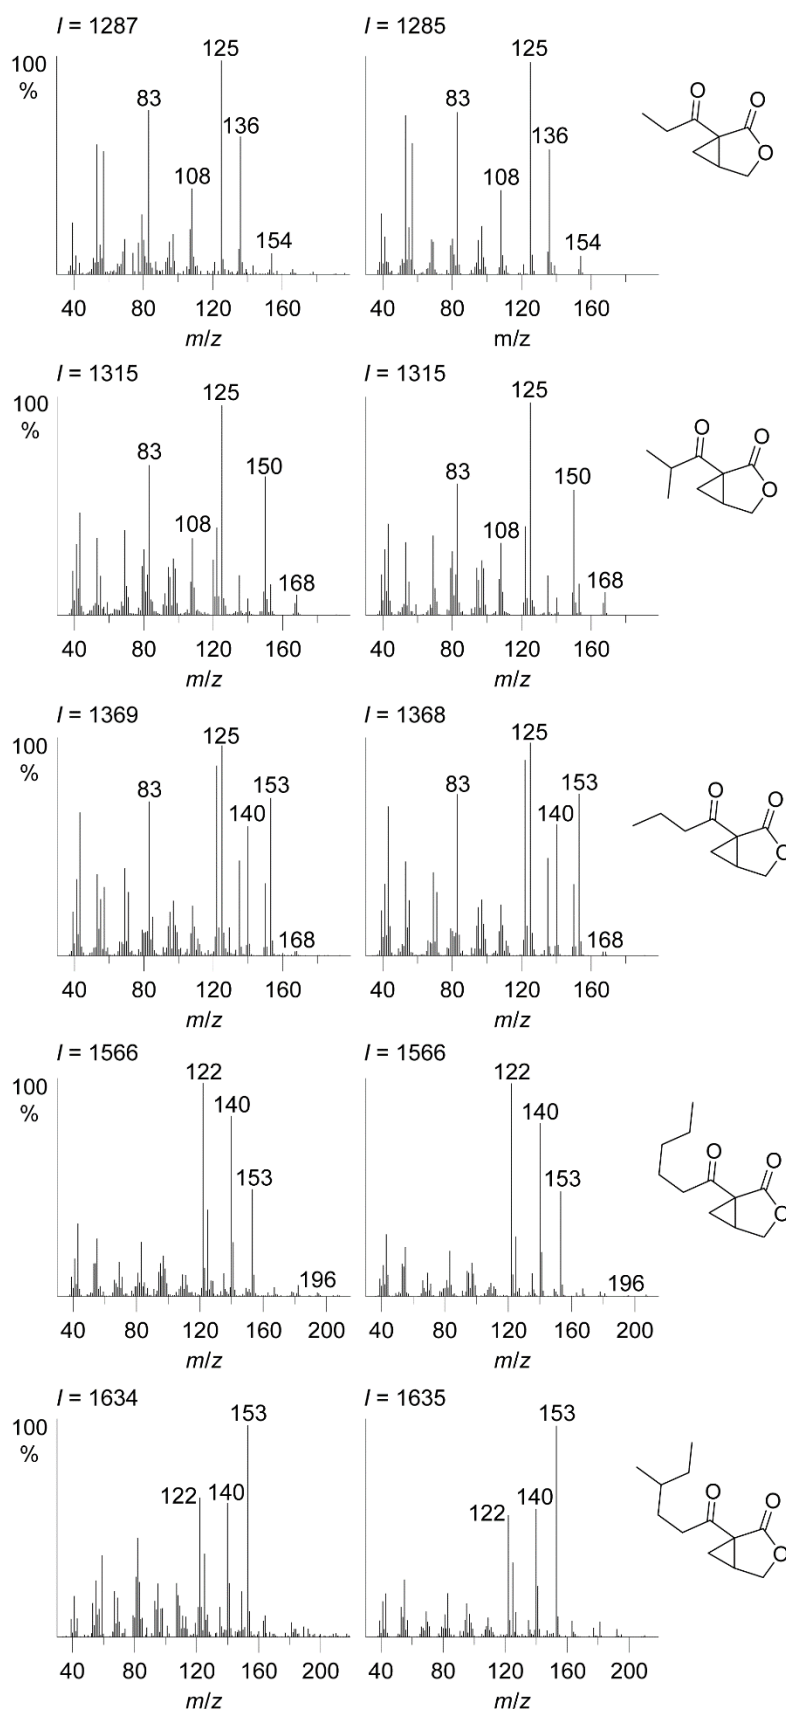

**Figure S1.** Comparison of mass spectra and gas chromatographic retention index  $I$  of the natural products (left) and the synthetic compounds (right).

## SUPPORTING INFORMATION

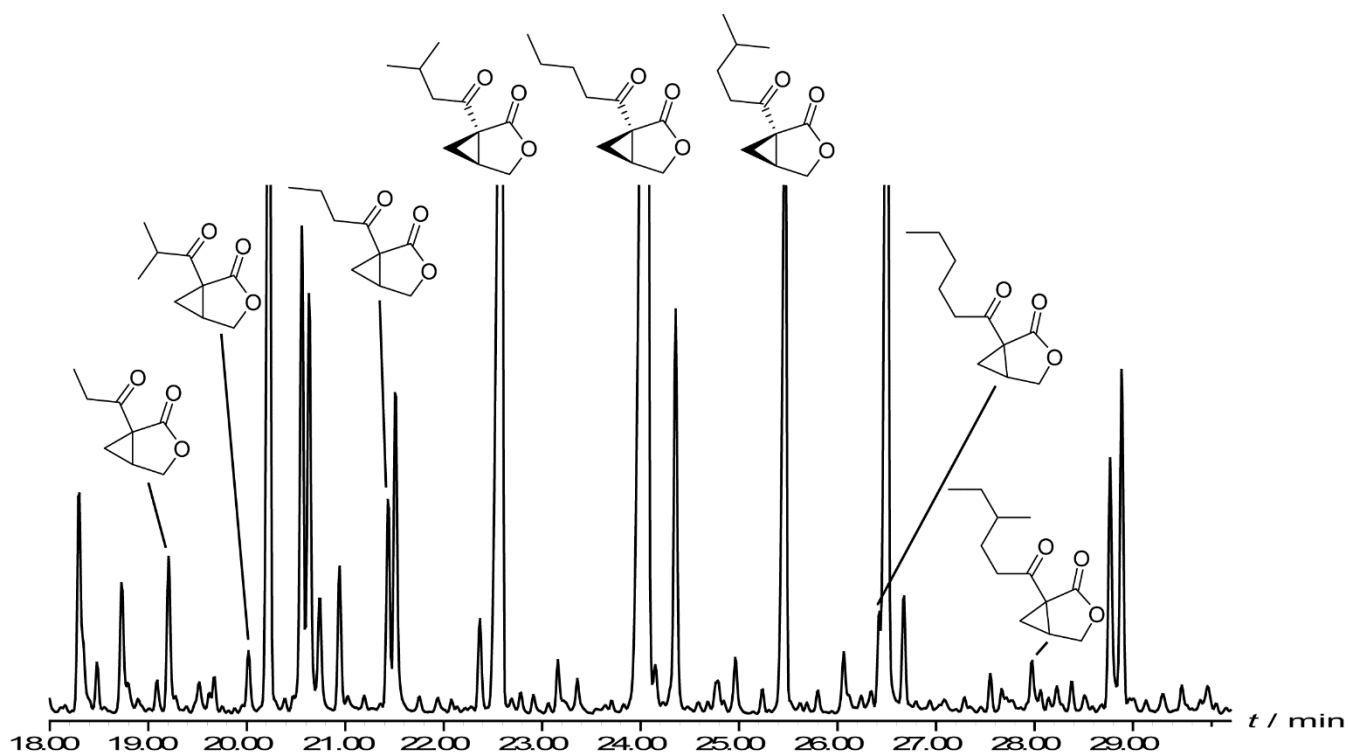

**Figure S2.** Section of the TIC-chromatogram of a 48 h CLSA extract of a liquid culture of *Salinispora arenicola* CNS-205 with salinilactone peaks tagged with the corresponding compound structures.

## SUPPORTING INFORMATION

## Part 2: Bioassays / Species and Spt9 phylogenies

**Table S1.** Strains used in the study.

| Strain  | Species                             | NCBI Taxon ID/DSM No. |
|---------|-------------------------------------|-----------------------|
| CNY-202 | <i>S. "cortesiana"</i>              | 1305843               |
| CNB-536 | <i>S. tropica</i>                   | 1136431               |
| CNY-666 | <i>S. "goodfellowii"</i>            | 1408341               |
| CNT-854 | <i>S. "oceanensis"</i>              | 1137265               |
| CNS-237 | <i>S. "mooreana"</i>                | 1288089               |
| CNR-942 | <i>S. "fenicalii"</i>               | 1169187               |
| CNS-055 | <i>S. "vitiensis"</i>               | 1169182               |
| CNB-440 | <i>S. tropica</i>                   | 369723 / DSM 44818    |
| CNS-205 | <i>S. arenicola</i>                 | 391037                |
| CNR-114 | <i>S. pacifica</i>                  | 1137260 / DSM 45820   |
| CNR-894 | <i>S. pacifica</i>                  | 1137261               |
|         | <i>Streptomyces lavendulae</i>      | DSM 40069             |
|         | <i>Streptomyces griseus</i>         | DSM 40236             |
|         | <i>Micromonospora nigra</i>         | DSM 43818             |
|         | <i>Micromonospora echinospora</i>   | DSM 43816             |
|         | <i>Amycolatopsis mediterranei</i>   | DSM 43304             |
|         | <i>Actinoplanes teichomyceticus</i> | DSM 43866             |

**Cultivation of bacteria**

All cultures were cultivated at 28 °C on agar plates on their respective media. Liquid cultures were initiated with these plated cultures at 100 mL scale. Liquid cultures for CLSA-extraction had a volume of 250 mL. All liquid cultures were cultivated at 28 °C in a heated shaker.

**Culture media****A1 medium (*Salinispora* bacteria):**

1000 mL water, 4 g yeast extract, 2 g bactopectone, 10 g soluble starch, 30 g instant ocean, (20 g agar).

**Medium 65 (Actinomycetes)**

1000 mL water, 4 g glucose, 4 g yeast extract, 10 g malt extract, (2 g calcium carbonate, 12 g agar).

**GPHF medium (*M. nigra*)**

1000 mL water, 10 g glucose, 5 g peptone from casein, 5 g yeast extract, 5 g beef extract, 0.74 g calcium chloride dihydrate, (15 g agar).

## SUPPORTING INFORMATION

## Agar diffusion assays

Sterile cellulose discs were combined with appropriate amounts of methanolic solutions of salinilactone B. The soaked discs were then dried by the sterile air stream under a clean bench. The bacteria were spread on the agar plates and the loaded discs were placed on the agar.

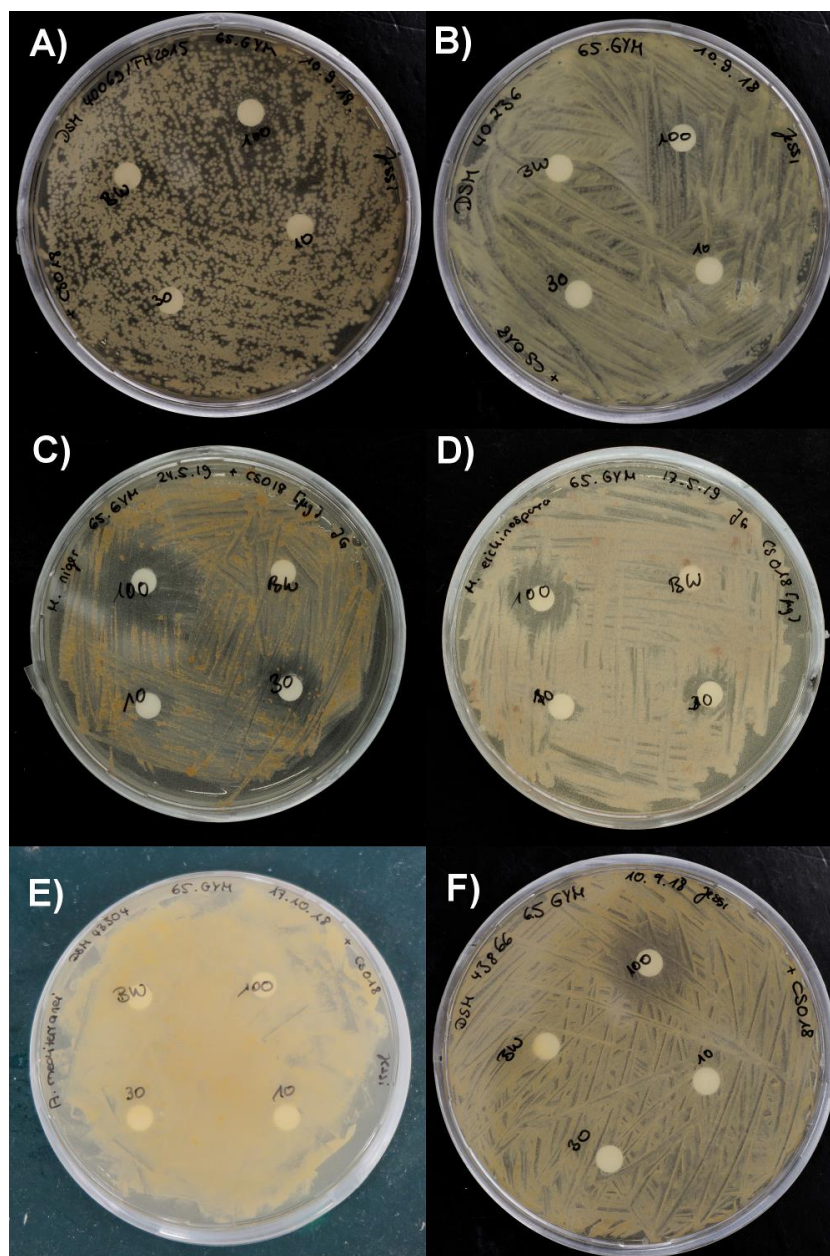

**Figure S3.** Agar diffusion tests of non-*Salinispora* actinomycetes using salinilactone B (**1b**) with loadings of 10  $\mu\text{g}$ , 30  $\mu\text{g}$  and 100  $\mu\text{g}$ . A) *Streptomyces lavendulae* DSM40069; B) *Streptomyces griseus* DSM40236; C) *Micromonospora nigra* DSM43818; D) *Micromonospora echinospora* DSM43816; E) *Amycolatopsis mediterranei* DSM43304; F) *Actinoplanes teichomyceticus* DSM43866.

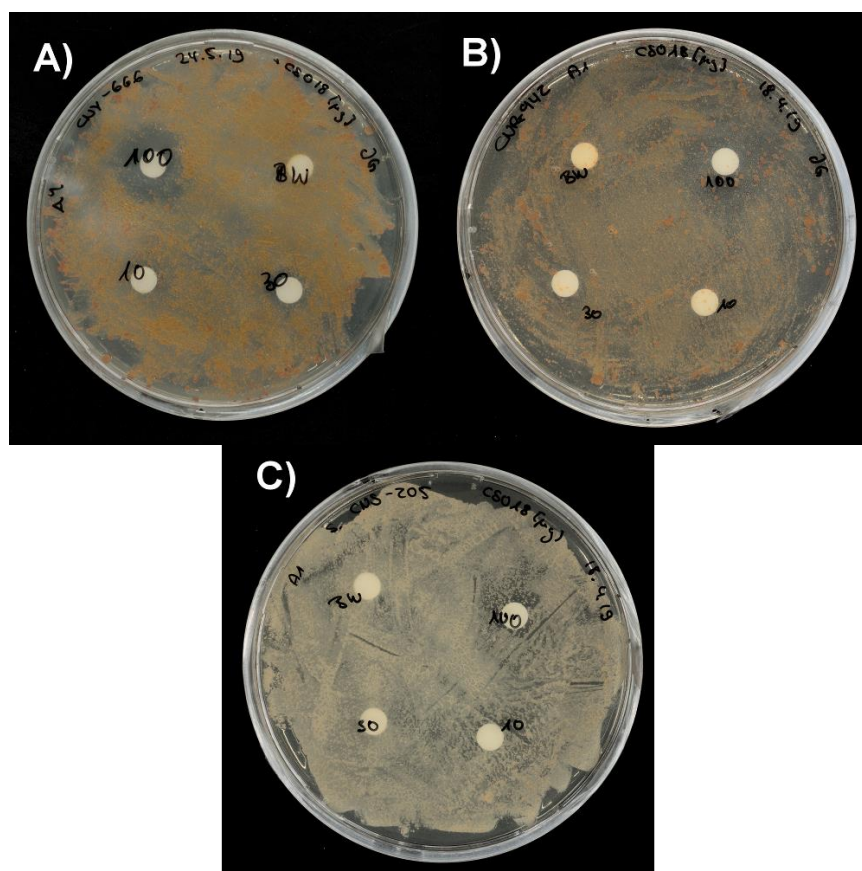

**Figure S4.** Agar diffusion tests of *Salinispora* bacteria using salinilactone B (**1b**) with loadings of 10 µg, 30 µg and 100 µg. A) *Salinispora 'goodfellowii'* CNY-666; B) *Salinispora 'fenicalii'* CNR-942; C) *Salinispora arenicola* CNS-205.

#### **Artemia salina cytotoxic assay**

*Artemia salina* eggs (Fisher scientific) hatched at 28°C in the dark in artificial seawater (40 g/L Instant Ocean, Marineland) that was oxygenated with an aquarium pump. After 48 hours, nauplii were separated from the eggs. The compounds were serially diluted in methanol, added in triplicate to 24 well plates, allowed to evaporate, and resuspended in 10 µL of DMSO prior to adding sea water for a final volume of 2.5 mL. 20 to 40 nauplii were added to each well including seawater and DMSO controls. After 24 hours of incubation at 28°C in the dark, dead nauplii were counted under a dissecting microscope. Odd swimming behavior was ignored and only organisms that showed no evidence of movement were considered dead. The experiment was repeated by triplicate using different batches of artificial sea water and eggs. LC<sub>50</sub> values were calculated in R by Probit analysis.<sup>[S2]</sup>

## SUPPORTING INFORMATION

**Table S2.** Occurrence of salinilactones A-G<sup>[a]</sup> (**1a-1g**) in different *Salinispora* strains based on 24 h CLSA experiments of liquid and agar cultures. Compounds are ordered according to their retention index. (-): Not detected; (+) Compound peak lower than 10% height of highest peak in TIC; (++) Compound peak higher than 10% height of highest peak in TIC; (?): Traces of compound detected, identification uncertain.

| <i>Salinispora</i> strain           | Cultivation (time)    | Optical density | Salinilactone D ( <b>1d</b> ) | Salinilactone E ( <b>1e</b> ) | Salinilactone F ( <b>1f</b> ) | Salinilactone A ( <b>1a</b> ) | Salinilactone B ( <b>1b</b> ) | Salinilactone C ( <b>1c</b> ) | Salinilactone G ( <b>1g</b> ) |
|-------------------------------------|-----------------------|-----------------|-------------------------------|-------------------------------|-------------------------------|-------------------------------|-------------------------------|-------------------------------|-------------------------------|
| <i>S. "cortesiana"</i><br>CNY-202   | liquid (4 d)<br>agar  | 2.00<br>-       | -<br>-                        | -<br>-                        | -<br>-                        | ?<br>+                        | ?<br>+                        | -<br>-                        | -<br>-                        |
| <i>S. tropica</i> CNB-<br>536       | liquid (4 d)<br>agar  | 2.00<br>-       | -<br>-                        | -<br>-                        | -<br>+                        | -<br>?                        | ?<br>?                        | -<br>-                        | -<br>-                        |
| <i>S. "goodfellowii"</i><br>CNY-666 | liquid (8 d)<br>agar  | 1.04<br>-       | -<br>-                        |
| <i>S. "oceanensis"</i><br>CNT-854   | liquid (12 d)<br>agar | 0.99<br>-       | +<br>-                        | -<br>-                        | +<br>?                        | +<br>+                        | +<br>+                        | ?<br>-                        | -<br>-                        |
| <i>S. "mooreana"</i><br>CNS-237     | liquid (6 d)<br>agar  | 1.31<br>-       | -<br>-                        | -<br>-                        | -<br>?                        | +<br>+                        | +<br>?                        | -<br>+                        | -<br>-                        |
| <i>S. "fenicalii"</i><br>CNR-942    | liquid (4 d)<br>agar  | 1.90<br>-       | -<br>-                        |
| <i>S. "vitiensis"</i><br>CNS-055    | liquid (5 d)<br>agar  | 2.00<br>-       | -<br>+                        | -<br>-                        | -<br>?                        | -<br>+                        | -<br>+                        | -<br>-                        | -<br>-                        |
| <i>S. tropica</i> CNB-<br>440       | liquid (5 d)<br>agar  | 1.60<br>-       | -<br>-                        | ?<br>?                        | +<br>+                        | +<br>+                        | +<br>+                        | +<br>?                        | +<br>-                        |
| <i>S. arenicola</i> CNS-<br>205     | liquid (6 d)<br>agar  | 2.00<br>-       | +<br>+                        | +<br>-                        | +<br>+                        | ++<br>+                       | ++<br>+                       | +<br>+                        | +<br>-                        |
| <i>S. pacifica</i> CNR-<br>114      | liquid (5 d)<br>agar  | 1.72<br>-       | +<br>+                        | ?<br>+                        | +<br>++                       | ++<br>++                      | +<br>+                        | +<br>+                        | +<br>?                        |
| <i>S. pacifica</i> CNR-<br>894      | liquid (3 d)<br>agar  | 2.00<br>-       | +<br>+                        | ?<br>-                        | ++<br>++                      | ++<br>++                      | ++<br>+                       | +<br>?                        | +<br>-                        |
| <i>S. arenicola</i> CNH-<br>996A    | agar                  | -               | +<br>?                        | ?<br>?                        | +<br>+                        | ++<br>++                      | ++<br>++                      | +<br>+                        | ?<br>?                        |

<sup>[a]</sup>Salinilactone H (**1h**) was not included because it was only detectable in very small amounts in long-time CLSA extracts (48 h) of *Salinispora arenicola* CNS-205.



SUPPORTING INFORMATION

---

**Part 3: Experimental Procedures****Instrumentation**

Each synthetic compound was analyzed by  $^1\text{H}$  and  $^{13}\text{C}$  NMR, IR, and GC/MS. NMR analyses were carried out on Bruker DPX-300, Bruker DRX 400, and Bruker AV-II 600 instruments using  $\text{CDCl}_3$  as solvent with TMS as internal standard. IR spectra were recorded with a Bruker Tensor 27 (Diamond ATR) or a Dani Instruments DiscovIR IR detector coupled to an Agilent Technologies 7890B gas chromatograph. GC/MS analyses were performed using an HP5973 mass spectrometer coupled to a HP6890 gas chromatograph and an Agilent 5977A mass spectrometer coupled to an Agilent 7890B gas chromatograph. Agilent HP5-MS (GC/MS; Agilent Technologies, 30 m  $\times$  0.25 mm i.d.  $\times$  0.25  $\mu\text{m}$ ) and Agilent HP5 (GC/IR; 30 m  $\times$  0.25 mm i.d.  $\times$  0.25  $\mu\text{m}$ ) columns with helium as carrier gas (GC/MS 1.2 ml/min, GC/IR 1.5 ml/min) were used for the analyses. A standard temperature program was used, starting at 50  $^\circ\text{C}$  for 5 min. Then the temperature was raised to 320  $^\circ\text{C}$  at a rate of 5  $^\circ\text{C}/\text{min}$ .

**General synthetic methods and materials**

Reactions were carried out under a nitrogen atmosphere employing Schlenk techniques and rubber septa to seal the flasks. Liquids were transferred using syringes. Reactions were monitored by TLC on silica pre-coated polyester sheets (Polygram<sup>®</sup> SIL G/UV254, Macherey-Nagel), which were stained using a basic potassium permanganate solution with subsequent gentle heating. Flash column chromatography was performed on silica gel (Merck 40-63  $\mu\text{m}$ ). Starting materials were purchased from commercial suppliers and used without further purification. Solvents were purified employing standard techniques. Acetic acid was dried by distillation with acetic acid anhydride.

## SUPPORTING INFORMATION

## Synthetic procedures

**General procedure 1 for the preparation of terminal alkynes from alkyl bromides**

Under a nitrogen atmosphere, lithium acetylide EDA-complex (1.50 eq.) and sodium iodide (0.05 eq.) were dissolved in dry DMSO (0.5 M in acetylide) and stirred for 5 minutes at room temperature. Then, a solution of the alkyl bromide (1.00 eq.) in dry DMSO (1 M) was added dropwise. The mixture was stirred for 5 h at room temperature and subsequently quenched with excess of water. The alkyne was distilled off together with water at a heating bath temperature of 140 °C. The pure alkyne was separated from the aqueous phase and dried over anhydrous sodium sulfate.<sup>[S3]</sup>

**General procedure 2 for the preparation of 2-alkynoic acids from terminal alkynes**

Under a nitrogen atmosphere, the alkyne (1.00 eq.) was dissolved in dry THF (0.75 M) and cooled to -78 °C. Then, *n*-butyllithium (1.6 M, 1.00 eq.) in hexane was added and the mixture was stirred at -78 °C for 45 minutes. Subsequently, the solution was warmed up to 0 °C and carbon dioxide was bubbled through it for 1 h. The reaction was quenched with water and the reaction mixture was extracted with a small amount of pentane. The pentane layer was separated and discarded while the aqueous layer was acidified with 2 M hydrochloric acid and extracted with ethyl acetate four times. The combined organic layers were washed with saturated sodium chloride solution and dried over anhydrous sodium sulfate. Evaporation of the solvent under reduced pressure yielded the product.<sup>[S4]</sup>

**General procedure 3 for the preparation of allyl esters from carboxylic acids**

A single neck flask was charged with the carboxylic acid (1.00 eq.), allyl alcohol (1.00 eq.) 4-dimethylaminopyridine (DMAP, 0.10 eq.) and dry DCM (DCM, 0.17 M in acid). The solution was cooled to 0 °C and *N,N'*-dicyclohexylcarbodiimide (DCC, 1.00 eq.) was added. The reaction mixture was allowed to warm up to room temperature and was stirred for 16 h. The resulting slurry was filtered and the solvent was removed from the filtrate under reduced pressure. The residue was purified by column chromatography over silica gel.<sup>[S5]</sup>

**General procedure 4 for the Pd-catalyzed cyclization of allyl alk-2-ynoates**

Acetic acid was dried and distilled under nitrogen before use. Under a nitrogen atmosphere, the allyl alkynoate (1.00 eq.) was dissolved in dry acetic acid (0.1 M) and combined with palladium-(II)-acetate (0.10 eq.) and (diacetoxyiodo)benzene (2.00 eq.). The mixture was heated to 80 °C and stirred for 3 h at this temperature. After quenching with water, the mixture was extracted with DCM three times. The combined organic phases were dried over anhydrous sodium sulfate and the solvent was removed under reduced pressure. The crude product was purified by column chromatography over silica gel. In case of contamination with acetic acid, the product was dissolved in chloroform and washed with saturated sodium bicarbonate solution. The organic layer was separated, dried over sodium sulfate, and the solvent was evaporated at reduced pressure.<sup>[S6]</sup>

## SUPPORTING INFORMATION

## 1-Bromo-3-methylpentane (2h)

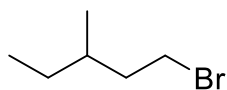

At 0 °C bromine (1.71 g, 10.8 mmol, 0.55 mL, 1.33 eq.) was slowly added to a solution of triphenylphosphine (2.82 g, 10.8 mmol, 1.33 eq.) in dry DCM (20 mL). After completion of the bromine addition, a solution of 3-methylpentan-1-ol (824 mg, 8.08 mmol, 1.00 mL, 1.00 eq.) in dry DCM was added. The reaction mixture was stirred for 3 h at 0 °C. Subsequently, the mixture was diluted with diethyl ether and washed with saturated aqueous NaHSO<sub>3</sub> solution. The phases were separated and the aqueous phase was extracted with diethyl ether (3 x 30 mL). The combined organic layers were dried over anhydrous sodium sulfate before the solvents were evaporated under reduced pressure to give the crude product. Stirring with pentane then precipitated the phosphine oxide formed during the reaction that was filtered off next. The residue was purified by column chromatography over silica gel (100% pentane) to yield the product as colorless oil (1.18 g, 7.13 mmol, 88%).<sup>[S7]</sup>

<sup>1</sup>H NMR (300 MHz, CDCl<sub>3</sub>) δ [ppm]: 0.86-0.91 (m, 6H), 1.19 (m, 1H), 1.36 (m, 1H), 1.55 (m, 1H), 1.68 (m, 1H), 1.89 (m, 1H), 3.36-3.51 (m, 2H). <sup>13</sup>C NMR (75 MHz, CDCl<sub>3</sub>) δ [ppm]: 11.1, 18.4, 29.0, 32.2, 33.2, 39.6. MS (EI, 70eV): *m/z* (%): 164 (M<sup>+</sup>, 3), 85 (76), 69 (30), 57 (100), 55 (65), 41 (61). IR (ATR diamond, ν<sub>max</sub> [cm<sup>-1</sup>]): 568, 643, 1215, 1254, 1461, 2874, 2926, 2961.

## 5-Methylhept-1-yne (3h)

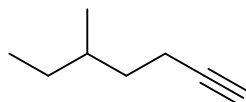

5-Methylhept-1-yne was prepared following general procedure 1. Amounts used: 1-bromo-3-methylpentane (2h) (800 mg, 4.85 mmol), lithium acetylide EDA-complex (669 mg, 7.27 mmol), sodium iodide (36.3 mg, 242 μmol), DMSO (21 mL). Yield: colorless liquid (340 mg, 3.09 mmol, 64%).

<sup>1</sup>H NMR (300 MHz, CDCl<sub>3</sub>) δ [ppm]: 0.83-0.92 (m, 6H), 1.07-1.24 (m, 1H), 1.27-1.41 (m, 2H), 1.41-1.64 (m, 2H), 1.92 (t, 1H, *J* = 2.7 Hz), 2.09-2.29 (m, 2H). <sup>13</sup>C NMR (75 MHz, CDCl<sub>3</sub>) δ [ppm]: 11.2, 16.2, 18.6, 29.0, 33.5, 35.2, 67.9, 84.9. MS (EI, 70eV): *m/z* (%): 109 (M-H<sup>+</sup>, 3), 95 (92), 81 (100), 79 (57), 70 (50), 55 (58), 41 (82). IR (ATR diamond, ν<sub>max</sub> [cm<sup>-1</sup>]): 625, 1367, 1385, 1468, 2119, 2871, 2955, 3314.

## 6-Methylhept-1-yne (3i)

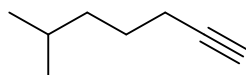

6-Methylhept-1-yne was prepared following general procedure 1. Amounts used: 1-bromo-4-methylpentane (624 mg, 3.78 mmol), lithium acetylide EDA-complex (522 mg, 5.67 mmol), sodium iodide (28.3 mg, 189 μmol), DMSO (16 mL). Yield: colorless liquid (173 mg, 1.57 mmol, 42%).

<sup>1</sup>H NMR (600 MHz, CDCl<sub>3</sub>) δ [ppm]: 0.89 (d, 6H, *J* = 6.6 Hz), 1.24-1.31 (2H, m), 1.49-1.60 (3H, m), 1.94 (t, 1H, *J* = 2.7 Hz), 2.17 (td, 2H, *J* = 7.3, 2.7 Hz). <sup>13</sup>C NMR (151 MHz, CDCl<sub>3</sub>) δ [ppm]: 18.4, 22.3, 26.2, 27.4, 37.8, 67.8, 84.6. MS (EI, 70eV): *m/z* (%): 110 (M<sup>+</sup>, 1), 109 (2), 95 (100), 69 (100), 67 (86), 55 (67), 43 (82), 41 (85). IR (ATR diamond, ν<sub>max</sub> [cm<sup>-1</sup>]): 625, 1367, 1385, 1468, 2119, 2871, 2955, 3314.

## 4-Methylpent-2-ynoic acid (4e)

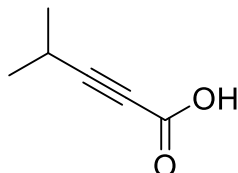

4-Methylpent-2-ynoic acid was prepared following general procedure 2. Amounts used: 3-methylbut-1-yne (333 mg, 4.89 mmol, 0.50 mL), *n*-butyllithium (1.6 M, 4.89 mmol, 3.06 mL), THF (6.0 mL). Yield: yellow liquid (492 mg, 4.39 mmol, 90%).

<sup>1</sup>H NMR (300 MHz, CDCl<sub>3</sub>) δ [ppm]: 1.25 (d, 6H, *J* = 7.0 Hz), 2.72 (spt, 1H, *J* = 7.0 Hz), 9.53 (s<sub>br</sub>, 1H). <sup>13</sup>C NMR (75 MHz, CDCl<sub>3</sub>) δ [ppm]: 20.6, 21.6, 71.8, 97.2, 158.6. IR (ATR diamond, ν<sub>max</sub> [cm<sup>-1</sup>]): 721, 1224, 1679, 2228, 2977.

## SUPPORTING INFORMATION

## 6-Methyloct-2-ynoic acid (4h)

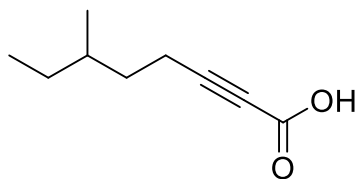

6-Methyloct-2-ynoic acid was prepared following general procedure 2. Amounts used: **3h** (300 mg, 2.72 mmol), *n*-butyllithium (1.6 M, 2.72 mmol, 1.70 mL), THF (4.0 mL). Yield: yellow liquid (386 mg, 2.50 mmol, 92%).

$^1\text{H NMR}$  (300 MHz,  $\text{CDCl}_3$ )  $\delta$  [ppm]: 0.81-0.97 (m, 6H), 1.08-1.25 (m, 1H), 1.28-1.55 (m, 3H), 1.55-1.72 (m, 1H), 2.29-2.44 (m, 2H), 10.7 (s<sub>br</sub>, 1H).  $^{13}\text{C NMR}$  (75 MHz,  $\text{CDCl}_3$ )  $\delta$  [ppm]: 11.1, 16.5, 18.5, 28.9, 33.6, 34.0, 72.5, 93.0, 158.6. IR (ATR diamond,  $\nu_{\text{max}}$  [ $\text{cm}^{-1}$ ]): 604, 754, 1275, 1682, 2236, 2876, 2928, 2961.

## 7-Methyloct-2-ynoic acid (4i)

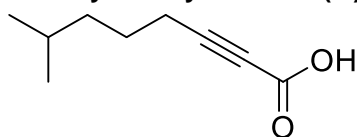

7-Methyloct-2-ynoic acid was prepared following general procedure 2. Amounts used: **3i** (160 mg, 1.45 mmol), *n*-butyllithium (1.6 M, 1.45 mmol, 0.91 mL), THF (1.8 mL). Yield: yellow liquid (213 mg, 1.38 mmol, 95%).

$^1\text{H NMR}$  (300 MHz,  $\text{CDCl}_3$ )  $\delta$  [ppm]: 0.89 (d, 6H,  $J = 6.6$  Hz), 1.22-1.35 (m, 2H), 1.49-1.68 (m, 3H), 2.34 (t, 2H,  $J = 7.2$  Hz), 10.6 (s<sub>br</sub>, 1H).  $^{13}\text{C NMR}$  (75 MHz,  $\text{CDCl}_3$ )  $\delta$  [ppm]: 19.0, 22.4, 25.3, 27.6, 38.0, 72.6, 92.7, 158.5. IR (ATR diamond,  $\nu_{\text{max}}$  [ $\text{cm}^{-1}$ ]): 756, 1276, 1682, 2236, 2954.

## Allyl pent-2-ynoate (5d)

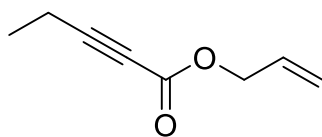

Allyl pent-2-ynoate was prepared following general procedure 3. Amounts used: Pent-2-ynoic acid (200 mg, 2.04 mmol), allyl alcohol (118 mg, 2.04 mmol, 0.14 mL), DCC (421 mg, 2.04 mmol), DMAP (24.9 mg, 204  $\mu\text{mol}$ ), DCM (12 mL). Column chromatography using a 4:1 mixture of pentane/DCM. Yield: colorless liquid (285 mg, 1.87 mmol, 92%).

$^1\text{H NMR}$  (300 MHz,  $\text{CDCl}_3$ )  $\delta$  [ppm]: 1.21 (t, 3H,  $J = 7.6$  Hz), 2.35 (q, 2H,  $J = 7.6$  Hz), 4.65 (ddd, 2H,  $J = 5.8, 1.5, 1.4$  Hz), 5.28 (dq, 1H,  $J = 10.0, 1.4$  Hz), 5.36 (dq, 1H,  $J = 17.1, 1.5$  Hz), 5.93 (ddt, 1H,  $J = 17.1, 10.0, 5.8$  Hz).  $^{13}\text{C NMR}$  (75 MHz,  $\text{CDCl}_3$ )  $\delta$  [ppm]: 12.4, 12.5, 66.3, 72.3, 91.0, 119.2, 131.3, 153.5. MS (EI, 70eV):  $m/z$  (%): 137 ( $[\text{M}-1]^+$ , 3), 109 (4), 93 (14), 81 (100), 53 (39). IR (solid,  $\nu_{\text{max}}$  [ $\text{cm}^{-1}$ ]): 752, 1055, 1085, 1456, 1651, 1714, 2242, 2944, 2985, 3024, 3088.

## Allyl 4-methylpent-2-ynoate (5e)

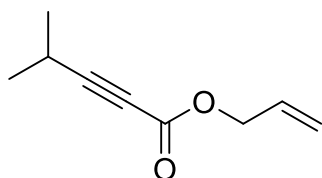

Allyl 4-methylpent-2-ynoate was prepared following general procedure 3. Amounts used: **4e** (471 mg, 4.20 mmol), allyl alcohol (244 mg, 4.20 mmol, 0.29 mL), DCC (866 mg, 4.20 mmol), DMAP (51.0 mg, 420  $\mu\text{mol}$ ), DCM (25 mL). Column chromatography using a 10:1 mixture of pentane/diethyl ether. Yield: colorless liquid (567 mg, 3.73 mmol, 89%).

$^1\text{H NMR}$  (300 MHz,  $\text{CDCl}_3$ )  $\delta$  [ppm]: 1.24 (d, 6H,  $J = 6.8$  Hz), 2.70 (spt, 1H,  $J = 6.8$  Hz), 5.28 (dq, 1H,  $J = 10.4, 1.2$  Hz), 5.36 (dq, 1H,  $J = 17.2, 1.5$  Hz), 5.93 (ddt, 1H,  $J = 17.2, 10.4, 5.9$  Hz).  $^{13}\text{C NMR}$  (75 MHz,  $\text{CDCl}_3$ )  $\delta$  [ppm]: 20.5, 21.7, 66.3, 72.1, 94.5, 119.2, 131.3, 153.6. MS (EI, 70eV):  $m/z$  (%): 152 ( $\text{M}^+$ , 2), 137 (12), 107 (14), 95 (100), 79 (20), 67 (75), 41 (56). IR (solid,  $\nu_{\text{max}}$  [ $\text{cm}^{-1}$ ]): 752, 1026, 1249, 1651, 1714, 2236, 2876, 3089.

## SUPPORTING INFORMATION

## Allyl hex-2-ynoate (5f)

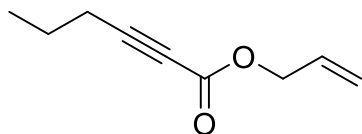

Allyl hex-2-ynoate was prepared following general procedure 3. Amounts used: Hex-2-ynoic acid (200 mg, 1.78 mmol), allyl alcohol (104 mg, 1.78 mmol, 0.12 mL), DCC (368 mg, 1.78 mmol), DMAP (21.8 mg, 178  $\mu$ mol), DCM (10 mL). Column chromatography using a 4:1 mixture of pentane/DCM. Yield: colorless liquid (219 mg, 1.44 mmol, 81%).

**$^1\text{H NMR}$  (300 MHz,  $\text{CDCl}_3$ )  $\delta$  [ppm]:** 1.02 (t, 3H,  $J = 7.4$  Hz), 1.62 (sxt, 2H,  $J = 7.3$  Hz), 2.32 (t, 2H,  $J = 7.3$  Hz), 4.65 (dt, 2H,  $J = 5.9, 1.3$  Hz), 5.28 (dq, 1H,  $J = 10.4, 1.2$  Hz), 5.36 (dq, 1H,  $J = 17.2, 1.5$  Hz), 5.93 (ddt, 1H,  $J = 17.2, 10.4, 5.9$  Hz).  **$^{13}\text{C NMR}$  (75 MHz,  $\text{CDCl}_3$ )  $\delta$  [ppm]:** 13.4, 20.6, 21.0, 66.2, 73.0, 89.8, 119.1, 131.3, 153.5. **MS (EI, 70eV):  $m/z$  (%):** 152 ( $M^+$ , 1), 137 (4), 124 (8), 95 (100), 79 (27), 67 (19), 53 (20), 41 (28). **IR (solid,  $\nu_{\text{max}}$  [ $\text{cm}^{-1}$ ]):** 751, 1082, 1250, 1651, 1713, 2239, 2877, 1968, 3025, 3089.

## Allyl oct-2-ynoate (5g)

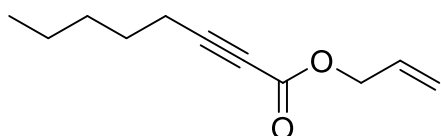

Allyl oct-2-ynoate was prepared following general procedure 3. Amounts used: Oct-2-ynoic acid (200 mg, 1.43 mmol), allyl alcohol (82.9 mg, 1.43 mmol), DCC (294 mg, 1.43 mmol), DMAP (17.4 mg, 143  $\mu$ mol), DCM (10 mL). Column chromatography using a 4:1 mixture of pentane/DCM. Yield: colorless liquid (196 mg, 1.08 mmol, 76%).

**$^1\text{H NMR}$  (300 MHz,  $\text{CDCl}_3$ )  $\delta$  [ppm]:** 0.87-0.95 (m, 3H), 1.23-1.45 (m, 4H), 1.52-1.66 (m, 2H), 2.33 (t, 2H,  $J = 7.1$  Hz), 4.65 (dt, 2H,  $J = 5.9, 1.4$  Hz), 5.25-5.31 (m, 1H), 5.36 (dq, 1H,  $J = 17.2, 1.5$  Hz), 5.93 (ddt, 1H,  $J = 17.2, 10.4, 5.9$  Hz).  **$^{13}\text{C NMR}$  (75 MHz,  $\text{CDCl}_3$ )  $\delta$  [ppm]:** 13.8, 18.6, 22.1, 27.2, 30.9, 66.2, 72.9, 90.0, 119.1, 131.3, 153.5. **MS (EI, 70eV):  $m/z$  (%):** 180 ( $M^+$ , 3), 137 (15), 123 (100), 79 (66), 67 (66), 55 (47), 41 (61). **IR (solid,  $\nu_{\text{max}}$  [ $\text{cm}^{-1}$ ]):** 752, 1077, 1251, 1710, 2241, 2863, 2873, 2957, 3024, 3087.

## Allyl 6-methyloct-2-ynoate (5h)

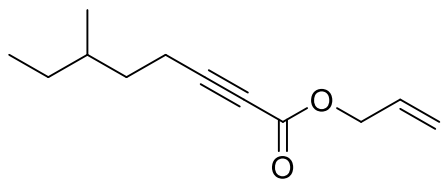

Acid **4h** (345 mg, 2.24 mmol, 1.00 eq.) and allyl alcohol (153  $\mu$ L, 130 mg, 2.24 mmol, 1.00 eq.) were combined with DMAP (27.3 mg, 224  $\mu$ mol, 0.10 eq.) and DCM (20 mL). Subsequently, *N*-ethyl-*N'*-(3-dimethylaminopropyl)carbodiimide hydrochloride (EDC, 429 mg, 2.24 mmol, 1.00 eq.) was added and the reaction mixture was stirred at room temperature for 16 h. Then water (30 mL) was added to quench the reaction and the solution was washed with water (2 x 20 mL) and sat. aq. NaCl solution (30 mL). The organic phase was dried over anhydrous sodium sulfate, filtered, and the solvent was removed under reduced pressure. The residue was purified by column chromatography over silica gel (20:1 pentane/diethyl ether). Yield: Colorless oil (230 mg, 1.18 mmol, 53%).

**$^1\text{H NMR}$  (300 MHz,  $\text{CDCl}_3$ )  $\delta$  [ppm]:** 0.82-0.93 (m, 6H), 1.08-1.24 (m, 1H), 1.27-1.52 (m, 3H), 1.56-1.69 (m, 1H), 2.25-2.41 (m, 2H), 4.65 (dq, 2H,  $J = 5.9, 0.9$  Hz), 5.27 (dq, 1H,  $J = 10.4, 1.2$  Hz), 5.36 (dq, 1H,  $J = 17.2, 1.5$  Hz), 5.93 (ddt, 1H,  $J = 17.2, 10.4, 5.8$  Hz).  **$^{13}\text{C NMR}$  (75 MHz,  $\text{CDCl}_3$ )  $\delta$  [ppm]:** 11.1, 16.4, 18.5, 28.9, 33.5, 34.1, 66.2, 72.8, 90.2, 119.1, 131.3, 153.5. **MS (EI, 70eV):  $m/z$  (%):** 194 ( $M^+$ , 3), 137 (56), 107 (41), 93 (37), 79 (83), 67 (71), 55 (47), 41 (100). **IR (solid,  $\nu_{\text{max}}$  [ $\text{cm}^{-1}$ ]):** 752, 1074, 1250, 1463, 1652, 1712, 2241, 2877, 2963, 3025, 3088.

## SUPPORTING INFORMATION

Allyl 7-methyloct-2-ynoate (**5i**)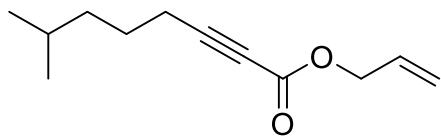

Allyl 7-methyloct-2-ynoate was prepared following general procedure 3. Amounts used: **4i** (203 mg, 1.31 mmol), allyl alcohol (76.3 mg, 1.31 mmol, 86.0  $\mu$ L), DCC (271 mg, 1.31 mmol), DMAP (16.1 mg, 131  $\mu$ mol), DCM (8.0 mL). Column chromatography using a 10:1 mixture of pentane/diethyl ether. Yield: colorless liquid (203 mg, 1.04 mmol, 79%), with slight impurities of DCC.

**$^1\text{H NMR}$  (300 MHz,  $\text{CDCl}_3$ )  $\delta$  [ppm]:** 0.89 (d, 6H,  $J = 6.6$  Hz), 1.22-1.33 (m, 2H), 1.49-1.65 (m, 3H), 2.32 (t, 2H,  $J = 7.2$  Hz), 4.63-4.67 (m, 2H), 5.28 (m, 1H), 5.36 (dq, 1H,  $J = 17.2, 1.5$  Hz), 5.93 (ddt, 1H,  $J = 17.2, 10.4, 5.8$  Hz).  **$^{13}\text{C NMR}$  (75 MHz,  $\text{CDCl}_3$ )  $\delta$  [ppm]:** 18.9, 22.4, 25.5, 27.6, 38.1, 66.3, 72.9, 90.0, 119.1, 131.3, 153.5. **MS (EI, 70eV):  $m/z$  (%):** 194 ( $\text{M}^+$ , 1), 137 (18), 109 (25), 93 (27), 79 (56), 69 (100), 55 (28), 41 (78). **IR (solid,  $\nu_{\text{max}}$  [ $\text{cm}^{-1}$ ]):** 751, 1076, 1249, 1651, 1712, 2240, 2871, 2957, 3024, 3089.

1-Propanoyl-3-oxabicyclo[3.1.0]hexan-2-one (**1d**)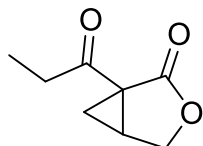

1-Propanoyl-3-oxabicyclo[3.1.0]hexan-2-one was prepared following general procedure 4. Amounts used: **5d** (179 mg, 1.30 mmol), palladium-(II)-acetate (29.1 mg, 130  $\mu$ mol), (diacetoxyiodo)benzene (836 mg, 2.59 mmol), dry acetic acid (11 mL). Column chromatography using a 1:1 mixture of pentane/diethyl ether. Yield: yellow liquid (113 mg, 730  $\mu$ mol, 56%).

**$^1\text{H NMR}$  (500 MHz,  $\text{CDCl}_3$ )  $\delta$  [ppm]:** 1.10 (t, 3H,  $J = 7.2$  Hz), 1.39 (dd, 1H,  $J = 5.5, 4.2$  Hz), 2.06 (dd, 1H,  $J = 8.0, 4.2$  Hz), 2.77 (m, 1H), 2.87 (dq, 1H,  $J = 19.0, 7.2$  Hz), 3.20 (dq, 1H,  $J = 19.0, 7.2$  Hz), 4.20 (d, 1H,  $J = 10.0$  Hz), 4.34 (dd, 1H,  $J = 9.5, 4.7$  Hz).  **$^{13}\text{C NMR}$  (126 MHz,  $\text{CDCl}_3$ )  $\delta$  [ppm]:** 7.4, 23.9, 29.6, 35.1, 36.1, 67.2, 172.8, 203.3. **MS (EI, 70eV):  $m/z$  (%):** 154 ( $\text{M}^+$ , 9), 136 (62), 125 (100), 108 (40), 83 (75), 57 (59), 53 (72). **IR (solid,  $\nu_{\text{max}}$  [ $\text{cm}^{-1}$ ]):** 830, 994, 1091, 1303, 1386, 1461, 1699, 1766, 2912, 2941, 2979, 3097.  **$I$  (HP5-MS):** 1285.

1-(2-Methylpropanoyl)-3-oxabicyclo[3.1.0]hexan-2-one (**1e**)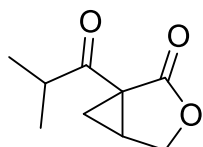

1-(2-Methylpropyl)-3-oxabicyclo[3.1.0]hexan-2-one was prepared following general procedure 4. Amounts used: **5e** (200 mg, 1.31 mmol), palladium-(II)-acetate (29.5 mg, 131  $\mu$ mol), (diacetoxyiodo)benzene (844 mg, 2.62 mmol), dry acetic acid (11 mL). Column chromatography using at first 3:1 mixture of pentane/diethyl ether and 1:1 pentane/diethyl ether later. Yield: yellow liquid (141 mg, 838  $\mu$ mol, 64%).

**$^1\text{H NMR}$  (500 MHz,  $\text{CDCl}_3$ )  $\delta$  [ppm]:** 1.11 (d, 3H,  $J = 6.7$  Hz), 1.19 (d, 3H,  $J = 6.7$  Hz), 1.39 (dd, 1H,  $J = 5.7, 4.1$  Hz), 2.03 (dd, 1H,  $J = 8.1, 4.1$  Hz), 2.71-2.77 (m, 1H), 3.67 (spt, 1H,  $J = 6.7$  Hz), 4.21 (d, 1H,  $J = 9.5$  Hz), 4.35 (dd, 1H,  $J = 9.5, 4.6$  Hz).  **$^{13}\text{C NMR}$  (126 MHz,  $\text{CDCl}_3$ )  $\delta$  [ppm]:** 17.9, 18.1, 23.6, 29.4, 35.2, 38.1, 67.1, 172.7, 206.5. **MS (EI, 70eV):  $m/z$  (%):** 168 ( $\text{M}^+$ , 10), 150 (50), 135 (19), 125 (100), 122 (45), 108 (37), 83 (69), 53 (72), 43 (72). **IR (solid,  $\nu_{\text{max}}$  [ $\text{cm}^{-1}$ ]):** 767, 1079, 1301, 1390, 1695, 1766, 2877, 2975.  **$I$  (HP5-MS):** 1315.

## SUPPORTING INFORMATION

## 1-Butanoyl-3-oxabicyclo[3.1.0]hexan-2-one (1f)

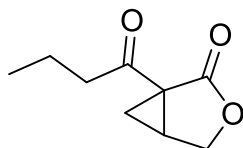

1-Butanoyl-3-oxabicyclo[3.1.0]hexan-2-one was prepared following general procedure 4. Amounts used: **5f** (100 mg, 657  $\mu\text{mol}$ ), palladium-(II)-acetate (35.0 mg, 156  $\mu\text{mol}$ ), (diacetoxyiodo)benzene (423 mg, 1.31 mmol), dry acetic acid (6.0 mL). Column chromatography using at first 1:1 mixture of pentane/DCM and 100% DCM later. Yield: yellow liquid (82.6 mg, 491  $\mu\text{mol}$ , 75%).

**$^1\text{H NMR}$  (400 MHz,  $\text{CDCl}_3$ )  $\delta$  [ppm]:** 0.95 (t, 6H,  $J = 7.5$  Hz), 1.39 (dd, 1H,  $J = 5.5, 4.3$  Hz), 1.58-1.73 (m, 2H), 2.05 (dd, 1H,  $J = 7.9, 4.1$  Hz), 2.77 (dddd, 1H,  $J = 8.0, 5.6, 4.8, 0.8$  Hz), 2.85 (ddd, 1H,  $J = 17.8, 7.8, 6.8$  Hz), 3.12 (ddd, 1H,  $J = 17.9, 7.8, 6.8$  Hz), 4.20 (d, 1H,  $J = 9.3$  Hz), 4.20 (d, 1H,  $J = 9.3$  Hz), 4.34 (dd, 1H,  $J = 9.5, 4.8$  Hz).  **$^{13}\text{C NMR}$  (100 MHz,  $\text{CDCl}_3$ )  $\delta$  [ppm]:** 13.5, 16.8, 23.7, 29.6, 36.2, 43.4, 67.2, 172.8, 202.6. **MS (EI, 70eV):  $m/z$  (%):** 168 ( $\text{M}^+$ , 1), 153 (77), 140 (60), 135 (48), 125 (100), 122 (88), 83 (69), 53 (82), 43 (93). **IR (solid,  $\nu_{\text{max}}$  [ $\text{cm}^{-1}$ ]):** 768, 1085, 1392, 1697, 1768, 2965.  **$I$  (HP5-MS):** 1369.

## 1-Hexanoyl-3-oxabicyclo[3.1.0]hexan-2-one (1g)

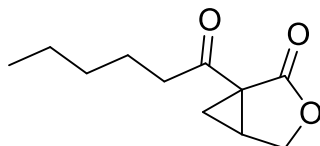

1-Hexanoyl-3-oxabicyclo[3.1.0]hexan-2-one was prepared following general procedure 4. Amounts used: **5g** (100 mg, 555  $\mu\text{mol}$ ), palladium-(II)-acetate (12.5 mg, 55.5  $\mu\text{mol}$ ), (diacetoxyiodo)benzene (357 mg, 1.11 mmol), dry acetic acid (5.0 mL). Column chromatography using at first 1:1 mixture of pentane/DCM and 100% DCM later. Yield: yellow liquid (93.1 mg, 474  $\mu\text{mol}$ , 86%).

**$^1\text{H NMR}$  (400 MHz,  $\text{CDCl}_3$ )  $\delta$  [ppm]:** 0.86-0.93 (m, 3H), 1.27-1.36 (m, 4H), 1.39 (dd, 1H,  $J = 5.7, 4.1$  Hz), 1.55-1.68 (m, 2H), 2.05 (dd, 1H,  $J = 8.0, 4.0$  Hz), 2.77 (dddd, 1H,  $J = 8.0, 5.6, 4.8, 0.8$  Hz), 2.86 (ddd, 1H,  $J = 17.8, 8.0, 6.2$  Hz), 3.12 (ddd, 1H,  $J = 17.8, 8.0, 6.2$  Hz), 4.20 (d, 1H,  $J = 9.5$  Hz), 4.34 (dd, 1H,  $J = 9.4, 4.9$  Hz).  **$^{13}\text{C NMR}$  (100 MHz,  $\text{CDCl}_3$ )  $\delta$  [ppm]:** 13.9, 22.4, 23.1, 23.8, 29.6, 31.2, 36.2, 41.6, 67.2, 172.8, 202.9. **MS (EI, 70eV):  $m/z$  (%):** 196 ( $\text{M}^+$ , 1), 167 (4), 153 (56), 140 (82), 125 (35), 122 (100), 83 (28), 53 (36). **IR (solid,  $\nu_{\text{max}}$  [ $\text{cm}^{-1}$ ]):** 767, 1086, 1391, 1696, 1769, 2873, 2957.  **$I$  (HP5-MS):** 1566.

## 1-(4-Methylhexanoyl)-3-oxabicyclo[3.1.0]hexan-2-one (1h)

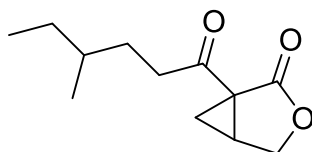

1-(4-Methylhexanoyl)-3-oxabicyclo[3.1.0]hexan-2-one was prepared following general procedure 4. Amounts used: **5h** (100 mg, 515  $\mu\text{mol}$ ), palladium-(II)-acetate (11.6 mg, 51.5  $\mu\text{mol}$ ), (diacetoxyiodo)benzene (332 mg, 1.03 mmol), dry acetic acid (4.0 mL). Column chromatography using at first 4:1 mixture of pentane/diethyl ether and 1:1 pentane/diethyl ether later. Yield: yellow liquid (57.1 mg, 272  $\mu\text{mol}$ , 53%), inseparable mixture of diastereomers.

**$^1\text{H NMR}$  (600 MHz,  $\text{CDCl}_3$ )  $\delta$  [ppm]:** 0.84-0.91 (m, 6H), 1.12-1.22 (m, 1H), 1.31-1.49 (m, 4H), 1.57-1.70 (m, 1H), 2.06 (ddd, 1H,  $J = 7.9, 4.2, 3.6$  Hz), 2.73-2.79 (m, 1H), 2.82-2.93 (m, 1H), 3.07-3.19 (m, 1H), 4.20 (d, 1H,  $J = 9.4$  Hz), 4.34 (dd, 1H,  $J = 9.4, 4.8$  Hz).  **$^{13}\text{C NMR}$  (151 MHz,  $\text{CDCl}_3$ )  $\delta$  [ppm]:** 11.3/11.3, 18.9/19.0, 23.8/23.8, 29.1/29.2, 29.6/29.7, 29.9, 33.9/33.9, 36.1/36.2, 39.5/39.5, 67.2, 172.8/172.8, 203.1/203.1. **MS (EI, 70eV):  $m/z$  (%):** 210 ( $\text{M}^+$ , 1), 181 (9), 153 (100), 140 (62), 125 (43), 122 (59), 83 (29), 55 (40). **IR (solid,  $\nu_{\text{max}}$  [ $\text{cm}^{-1}$ ]):** 767, 1087, 1390, 1463, 1697, 1770, 2875, 2929, 2962.  **$I$  (HP5-MS):** 1635.



## SUPPORTING INFORMATION

**1-(5-Methylhexanoyl)-3-oxabicyclo[3.1.0]hexan-2-one (1i)**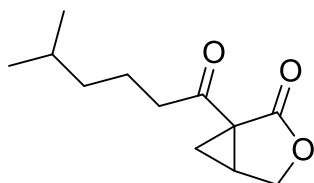

1-(5-Methylhexanoyl)-3-oxabicyclo[3.1.0]hexan-2-one was prepared following general procedure 4. Amounts used: **5i** (100 mg, 510  $\mu\text{mol}$ ), palladium-(II)-acetate (11.2 mg, 51.0  $\mu\text{mol}$ ), (diacetoxyiodo)benzene (332 mg, 1.03 mmol), dry acetic acid (4.4 mL). Column chromatography using at first 3:1 mixture of pentane/diethyl ether and 1:1 pentane/diethyl ether later. Yield: yellow liquid (53.5 mg, 254  $\mu\text{mol}$ , 49%).

**$^1\text{H NMR}$  (400 MHz,  $\text{CDCl}_3$ )  $\delta$  [ppm]:** 0.88 (d, 6H,  $J = 6.5$  Hz), 1.20 (dt, 2H,  $J = 8.7, 7.1$  Hz), 1.39 (dd, 1H,  $J = 5.7, 4.1$  Hz), 1.50-1.69 (m, 3H), 2.05 (dd, 1H,  $J = 7.9, 4.1$  Hz), 2.73-2.80 (m, 1H), 2.80-2.91 (m, 1H), 3.06-3.17 (m, 1H), 4.20 (d, 1H,  $J = 9.5$  Hz), 4.34 (dd, 1H,  $J = 9.5, 4.8$  Hz).  **$^{13}\text{C NMR}$  (100 MHz,  $\text{CDCl}_3$ )  $\delta$  [ppm]:** 21.2, 22.4, 22.5, 23.8, 27.8, 29.6, 36.2, 38.2, 41.8, 67.2, 172.8, 202.8. **MS (EI, 70eV):  $m/z$  (%):** 210 ( $\text{M}^+$ , 1), 167 (12), 153 (40), 140 (94), 125 (45), 122 (100), 95 (28), 69 (39), 53 (36), 43 (47). **IR (solid,  $\nu_{\text{max}}$  [ $\text{cm}^{-1}$ ]):** 766, 1089, 1390, 1698, 1769, 2872, 2956.  **$I$  (HP5-MS):** 1629.



## SUPPORTING INFORMATION

## Part 4: NMR Spectra

<sup>1</sup>H- and <sup>13</sup>C-NMR spectra of 3-methyl-1-bromopentane (2h)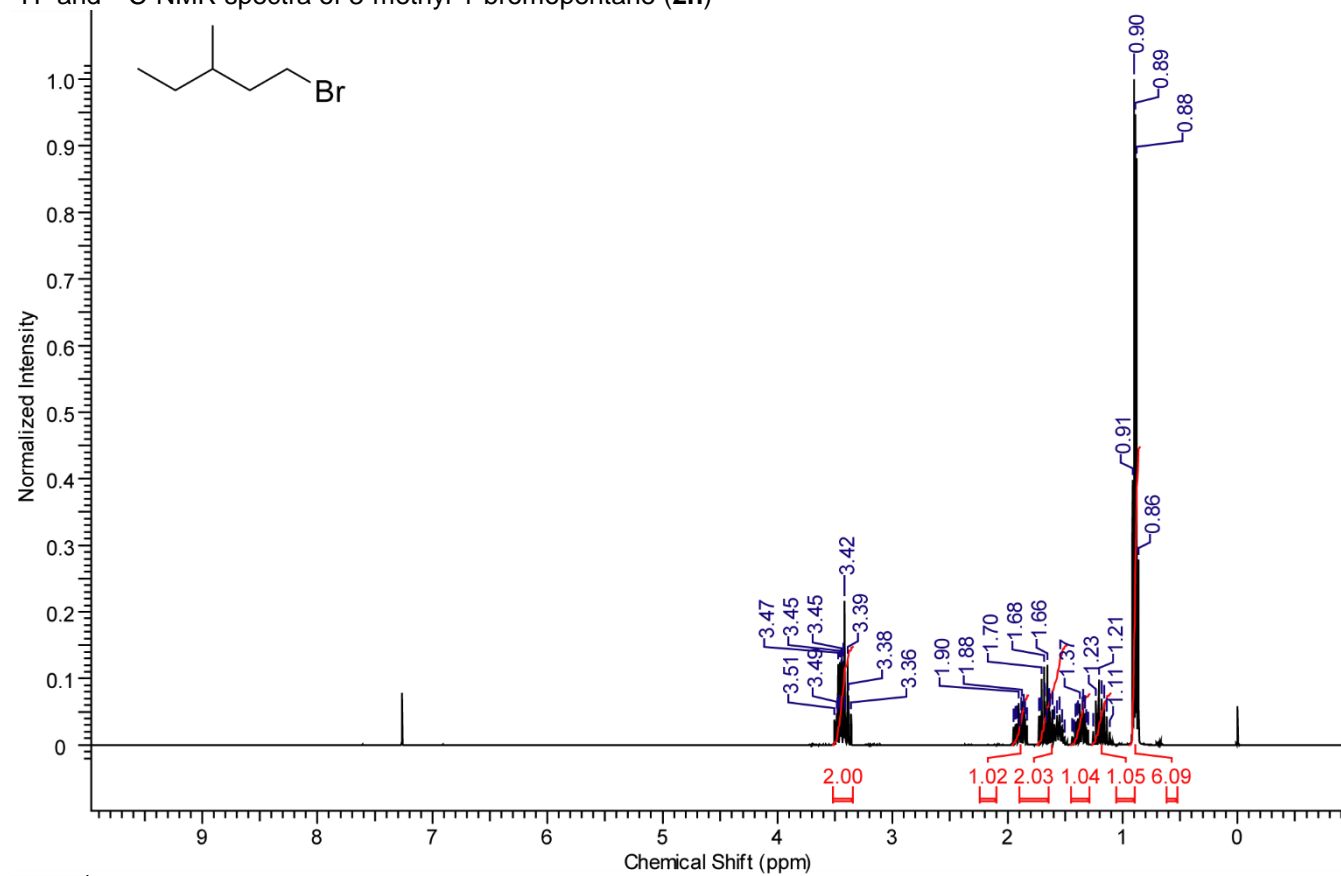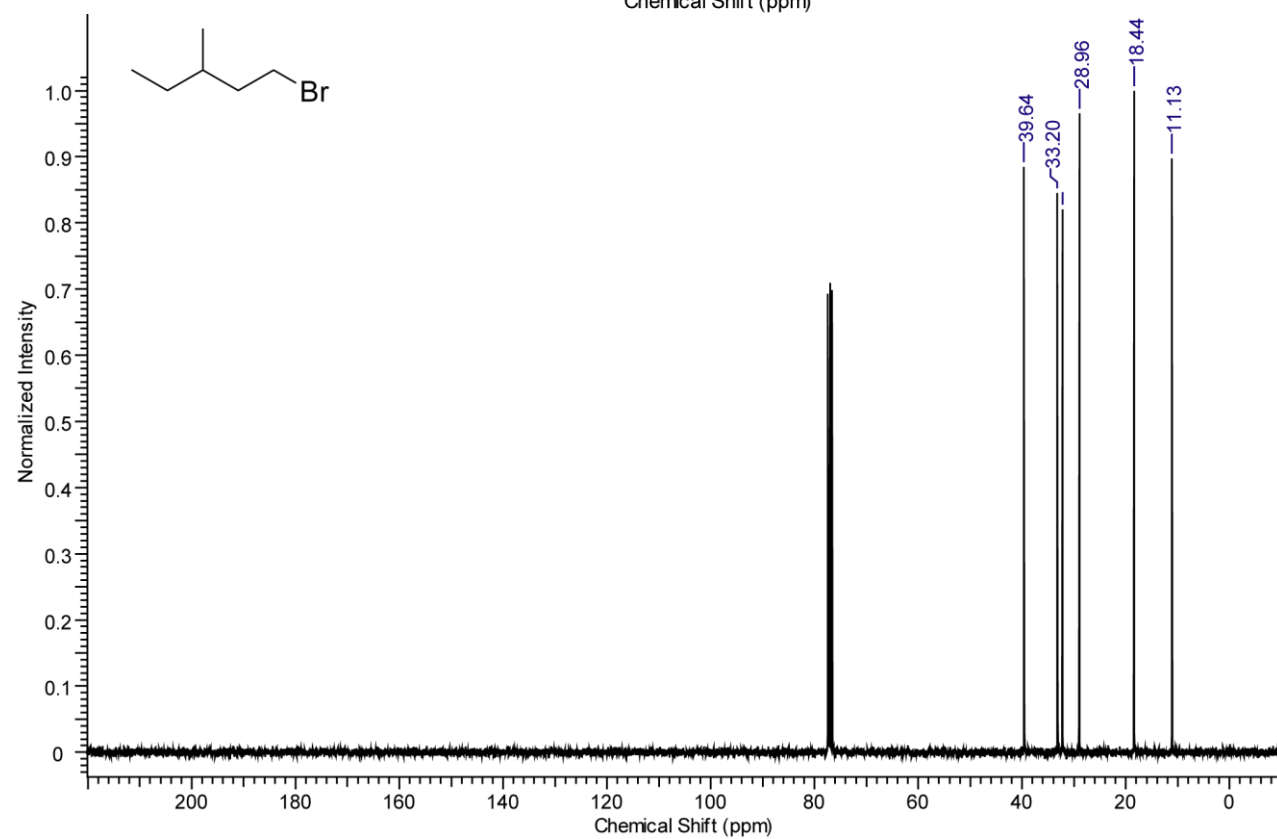

## SUPPORTING INFORMATION

<sup>1</sup>H- and <sup>13</sup>C-NMR spectra of 5-methylhept-1-yne (**3h**)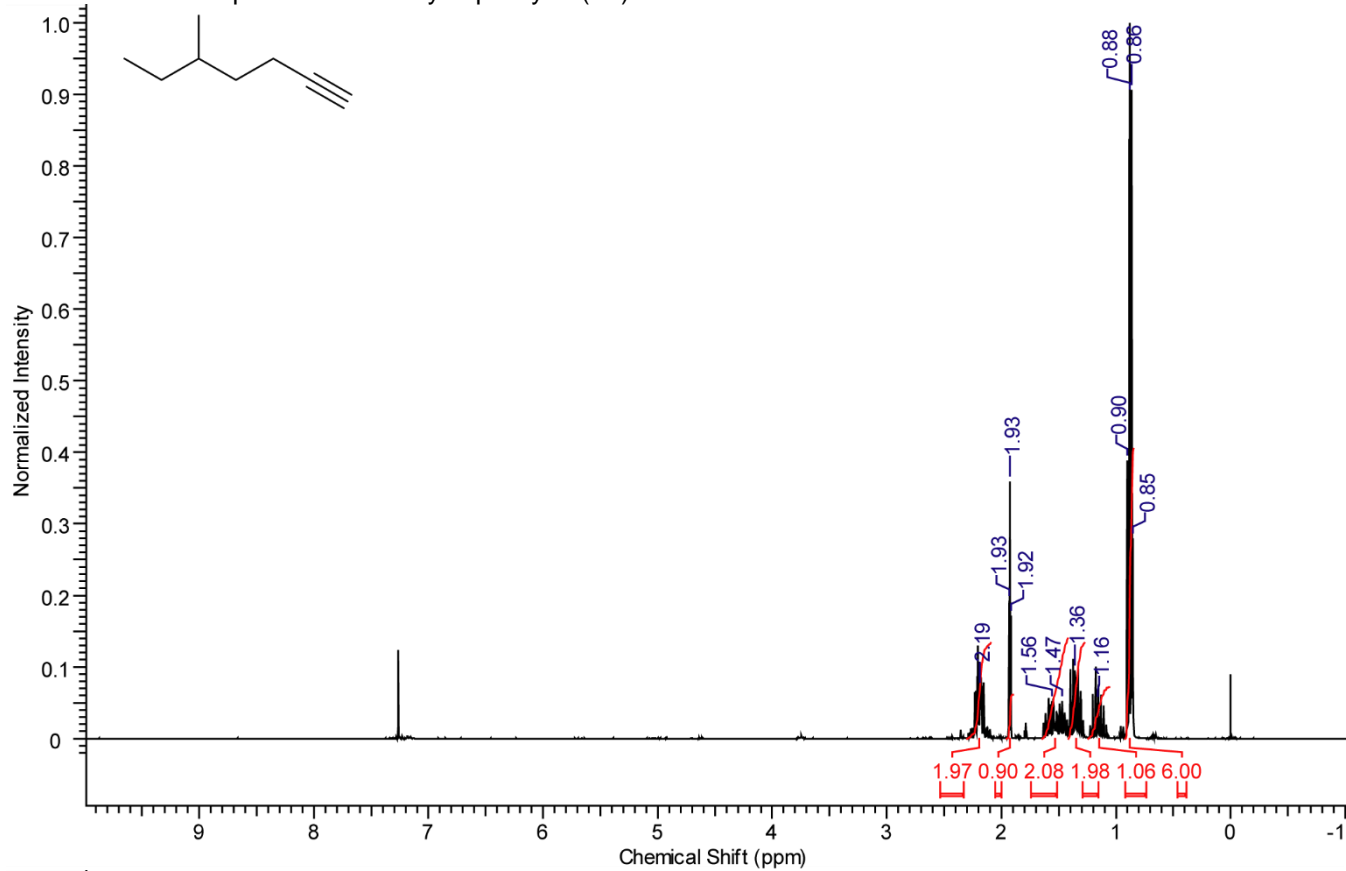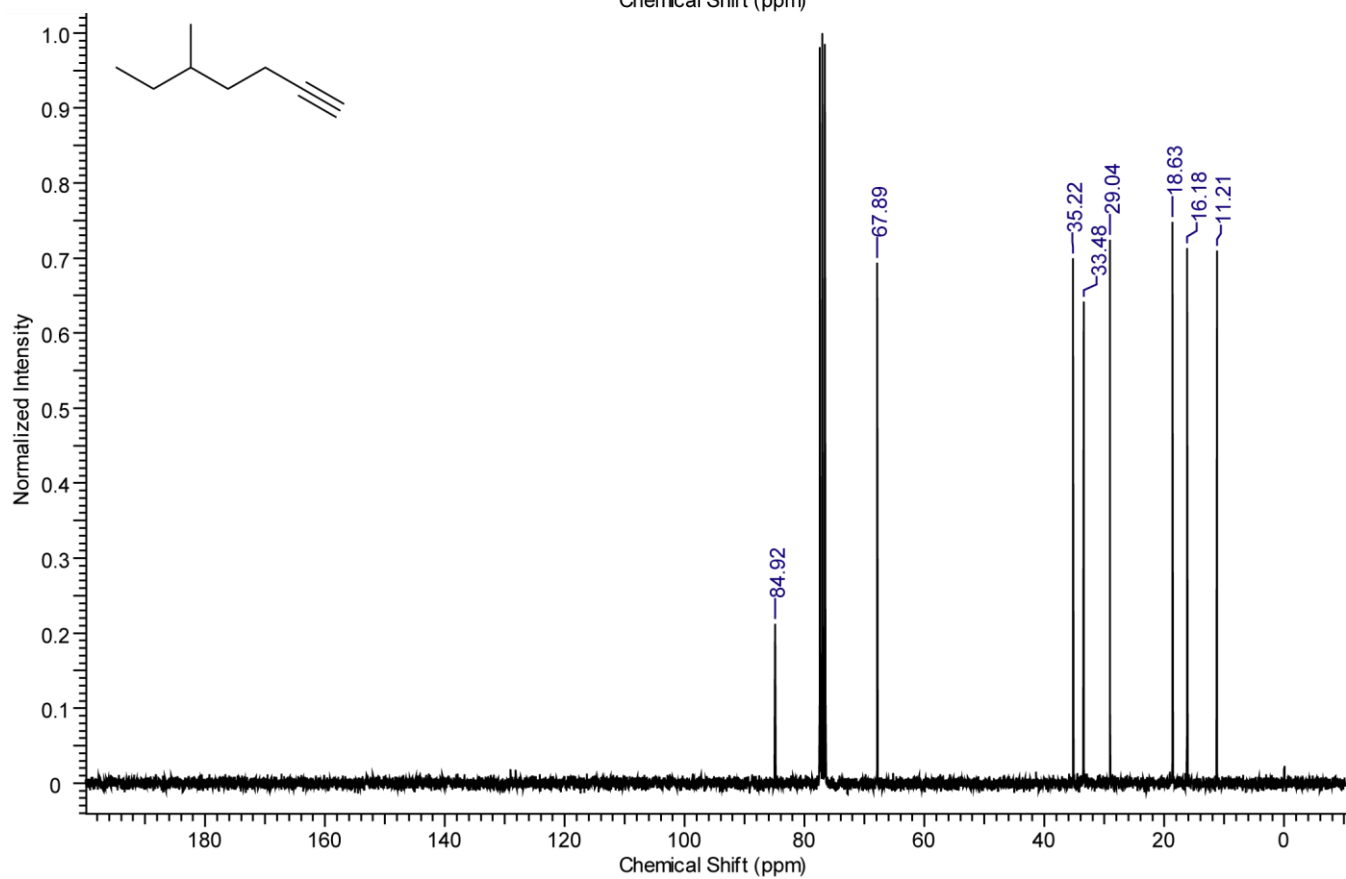

## SUPPORTING INFORMATION

<sup>1</sup>H- and <sup>13</sup>C-NMR spectra of 6-methylhept-1-yne (**3i**)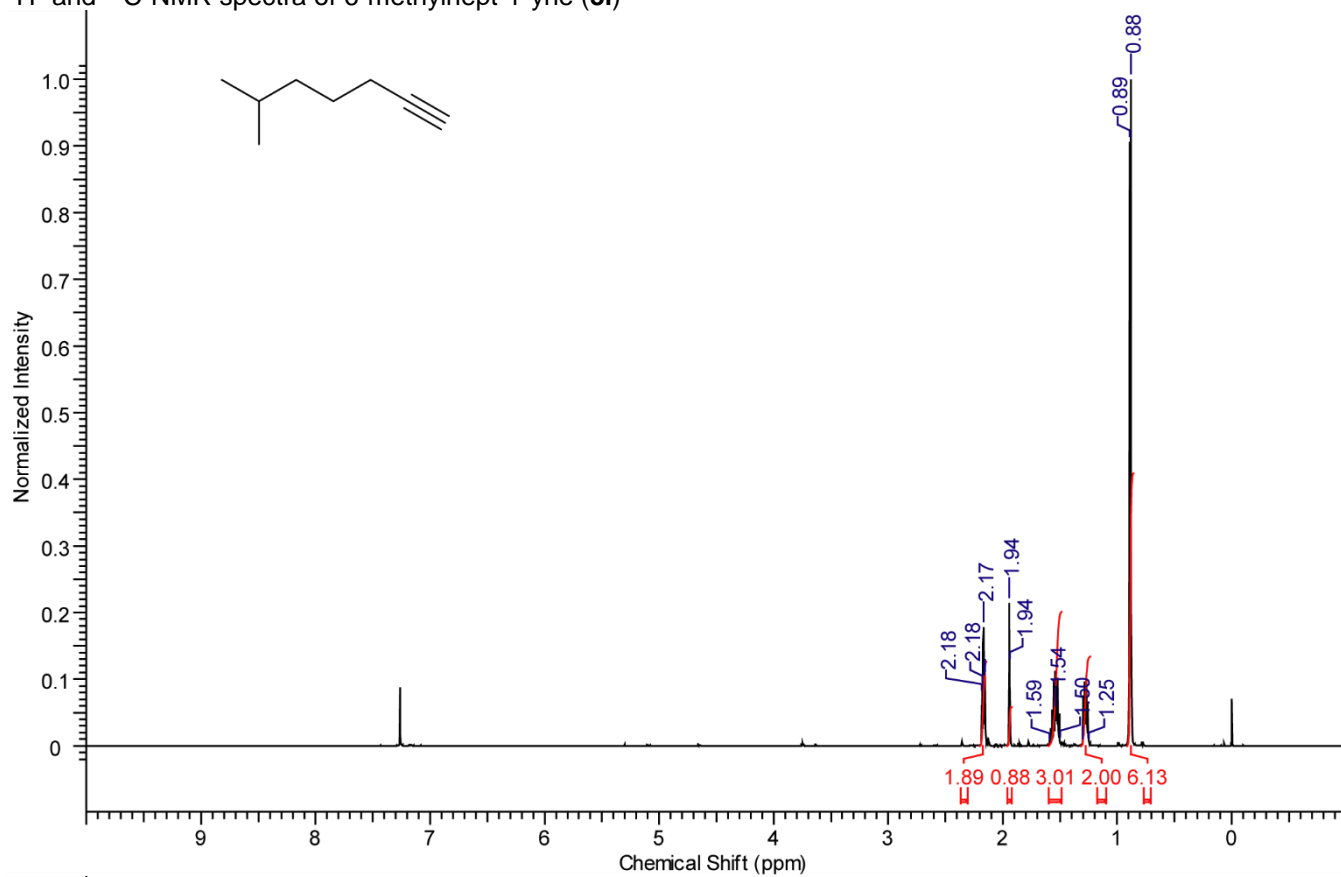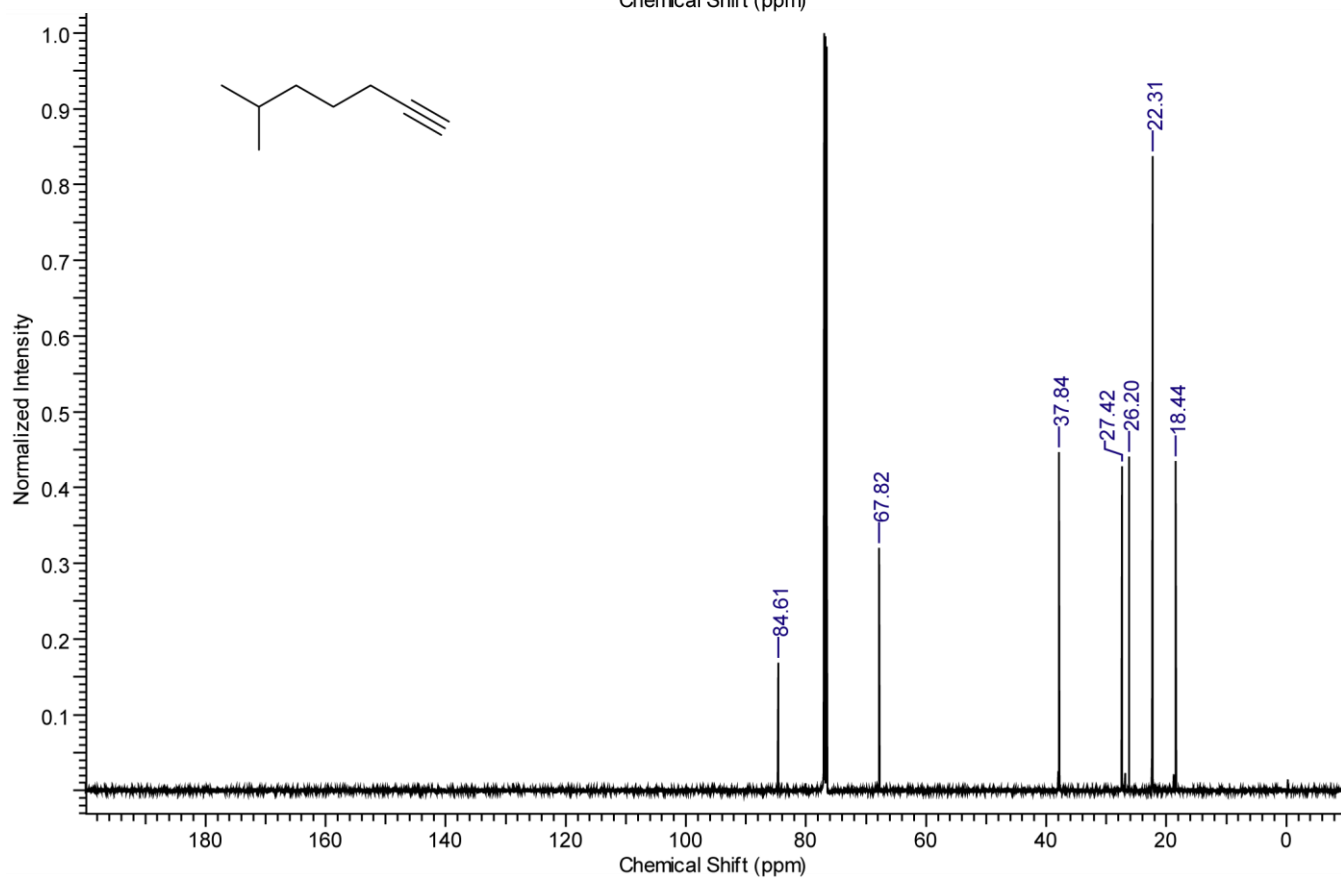

## SUPPORTING INFORMATION

<sup>1</sup>H- and <sup>13</sup>C-NMR spectra of 4-methylpent-2-ynoic acid (**4e**)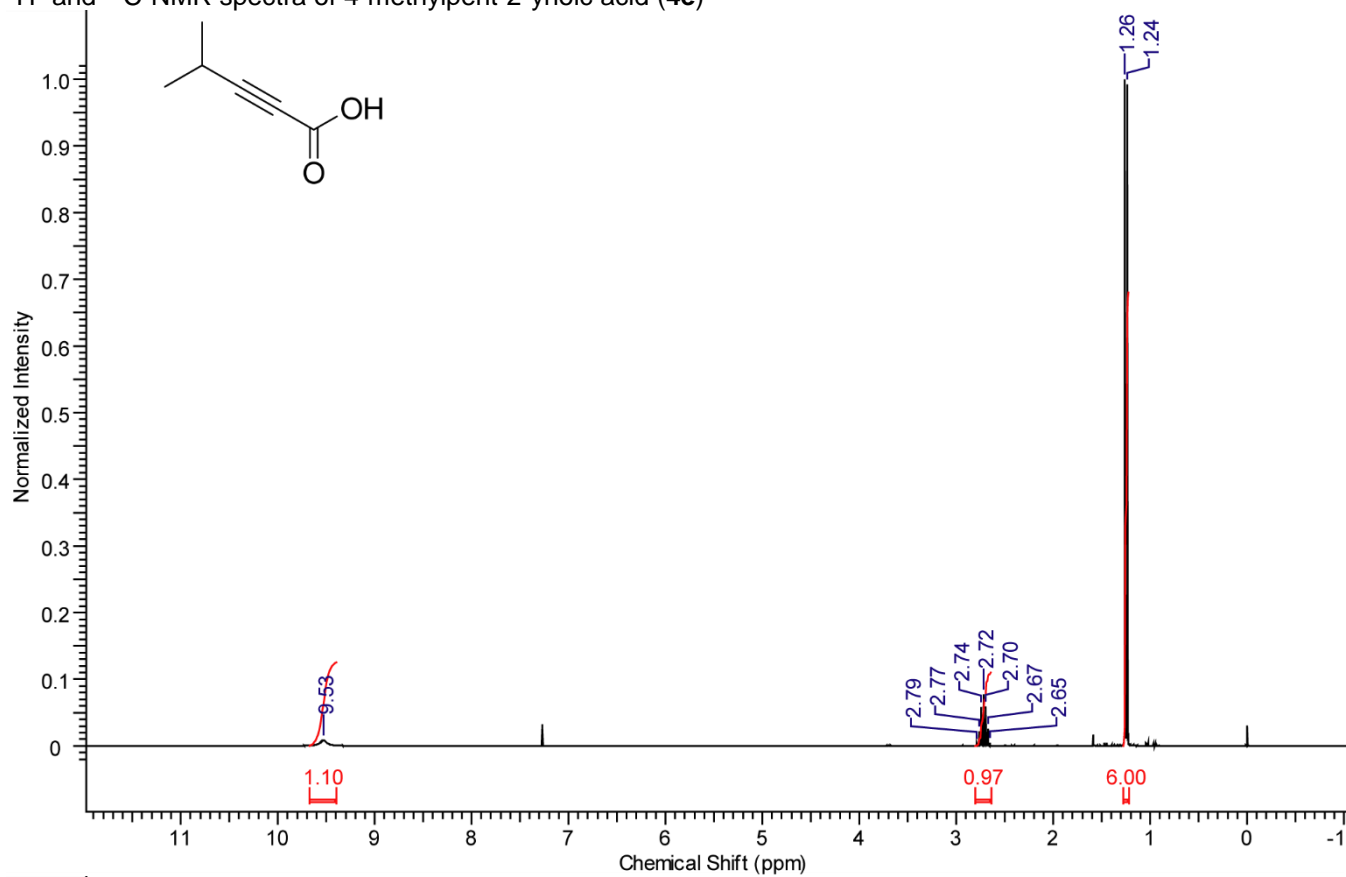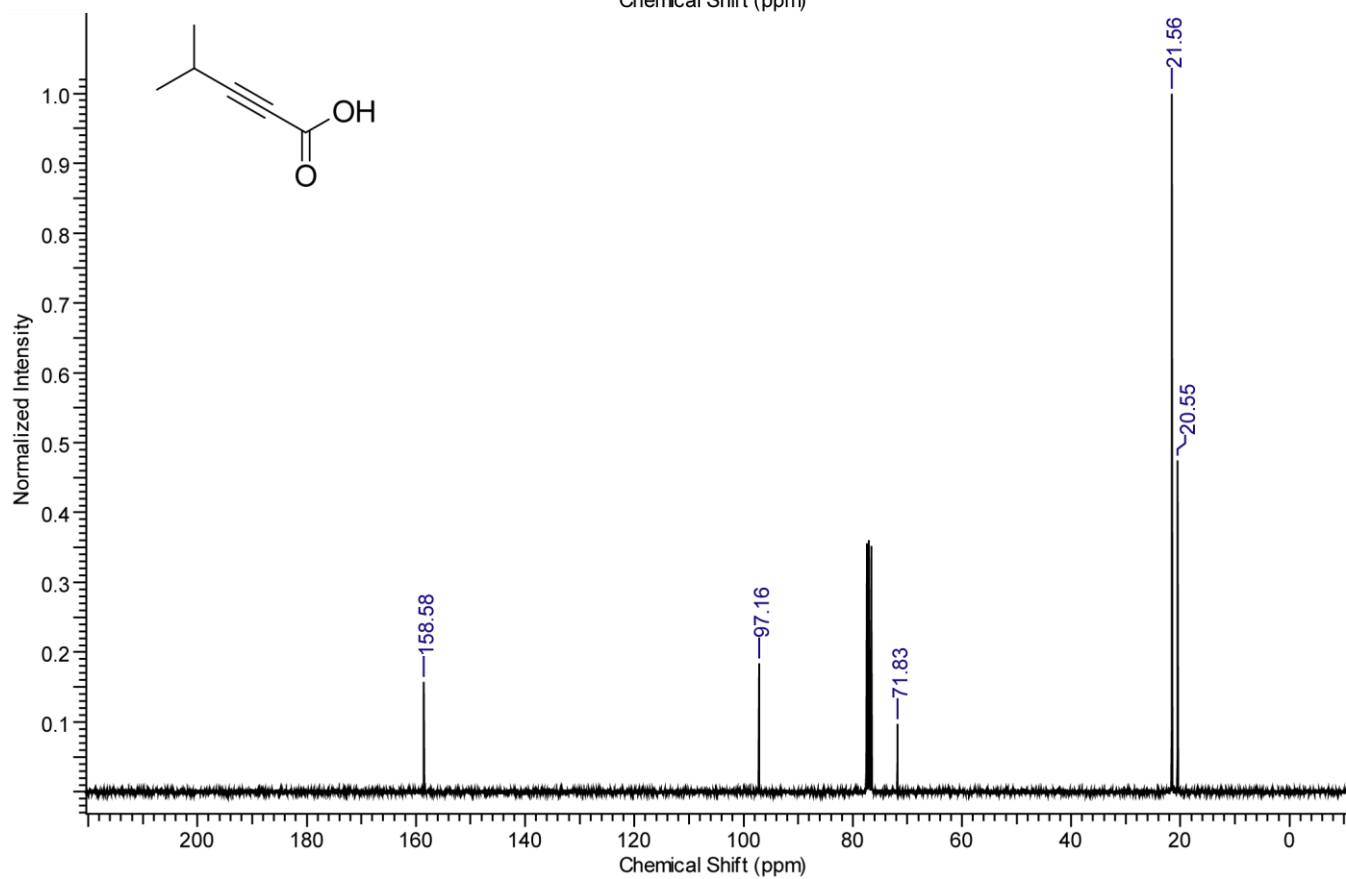

## SUPPORTING INFORMATION

<sup>1</sup>H- and <sup>13</sup>C-NMR spectra of 6-methyloct-2-ynoic acid (**4h**)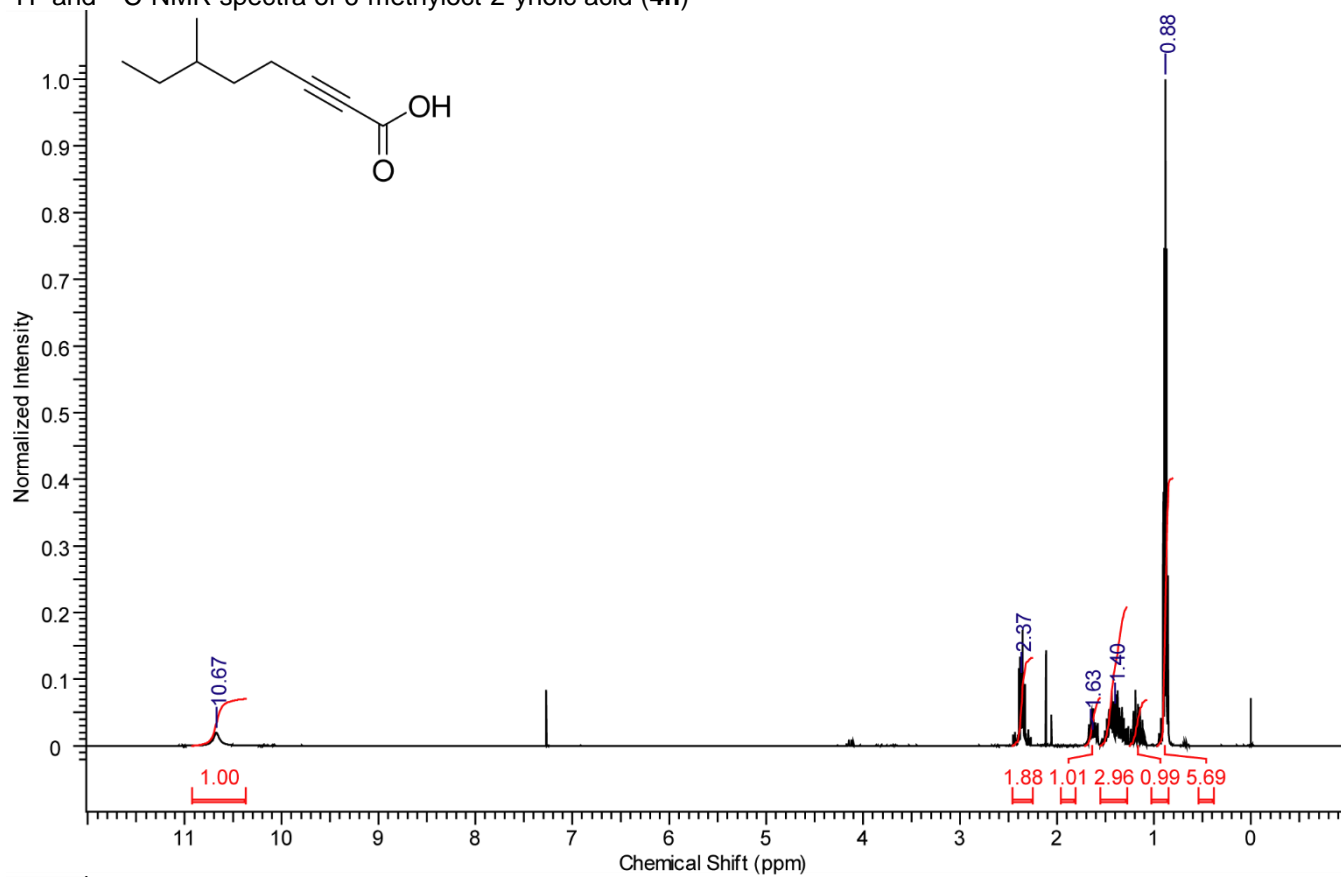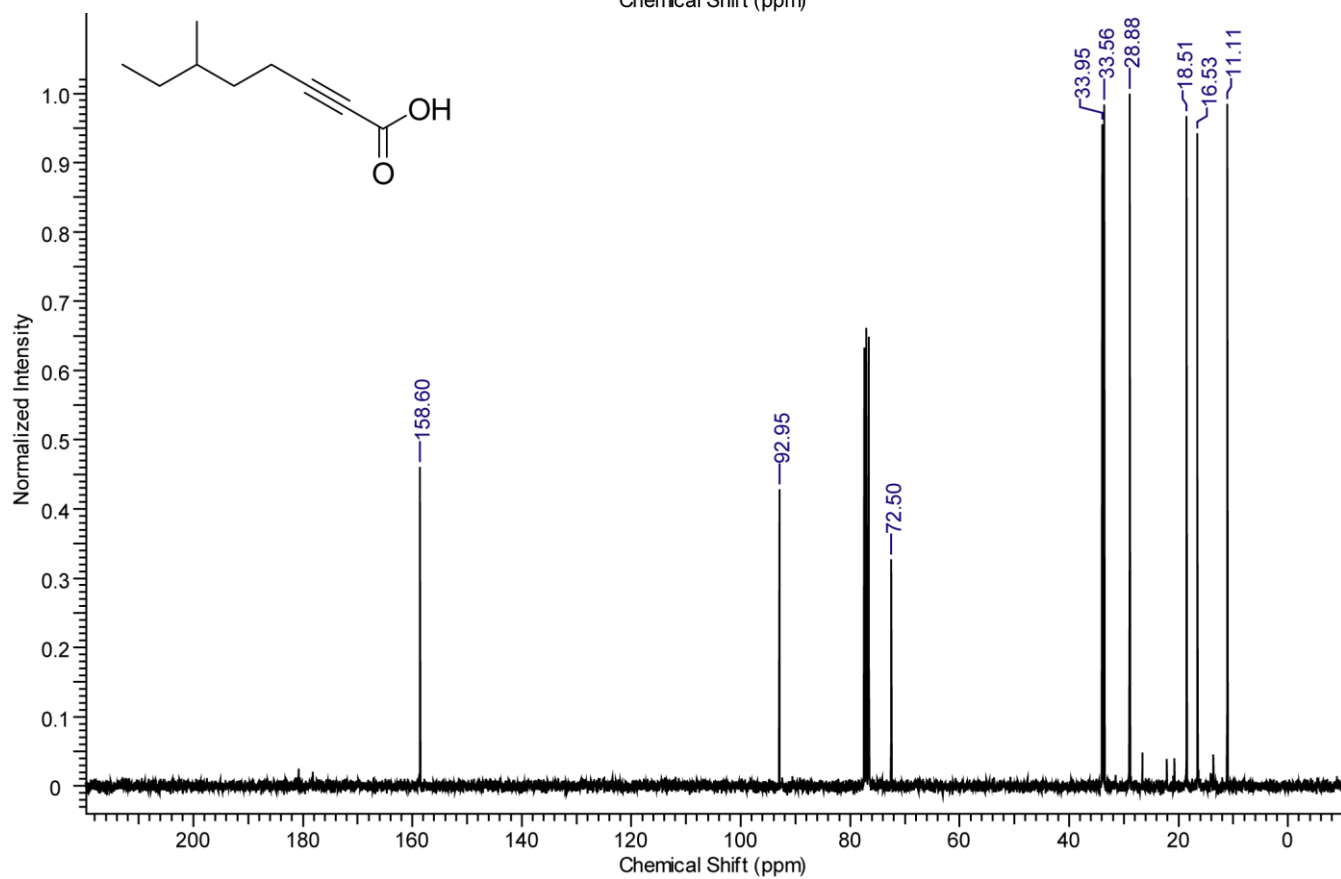

## SUPPORTING INFORMATION

<sup>1</sup>H- and <sup>13</sup>C-NMR spectra of 7-methyloct-2-ynoic acid (**4i**)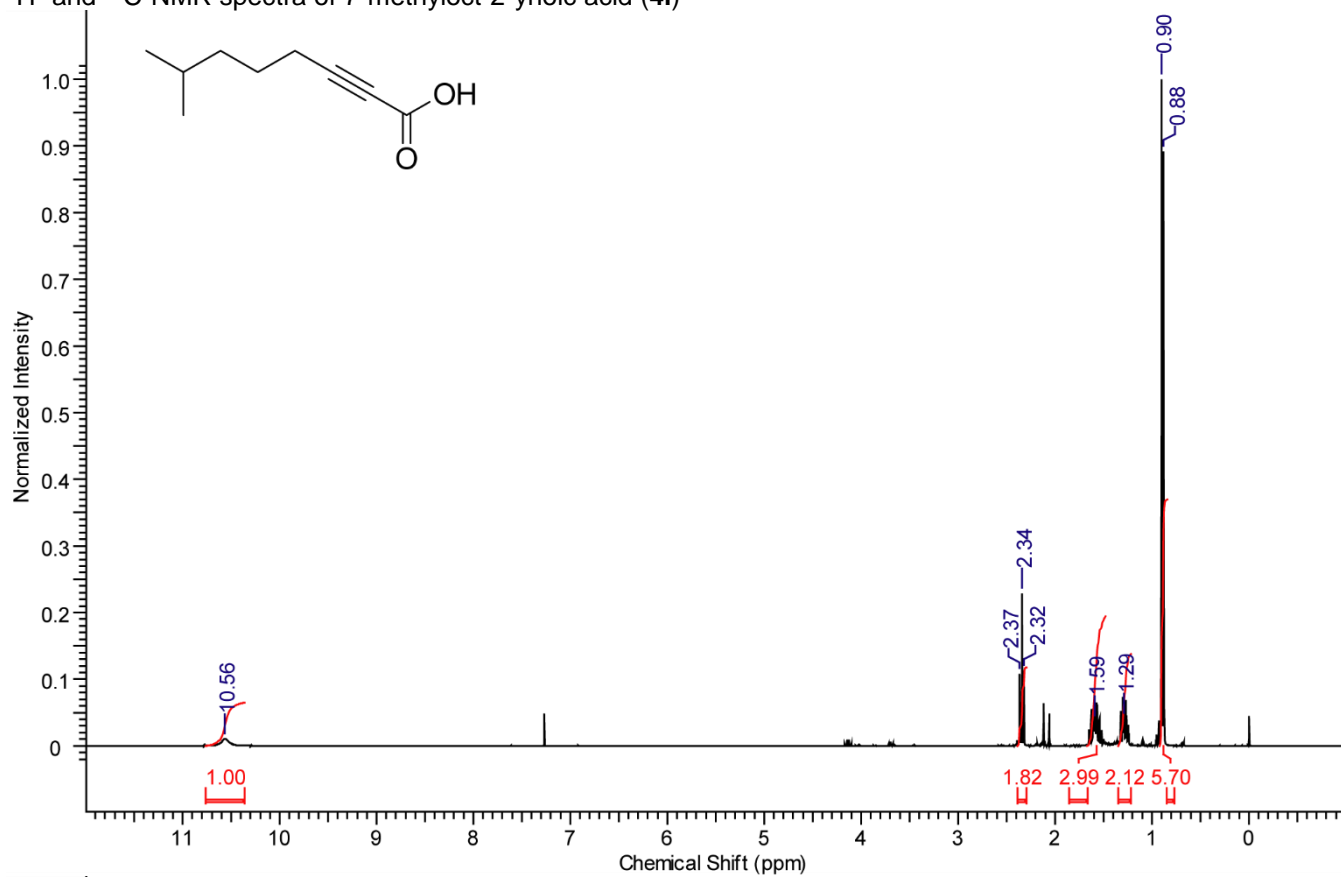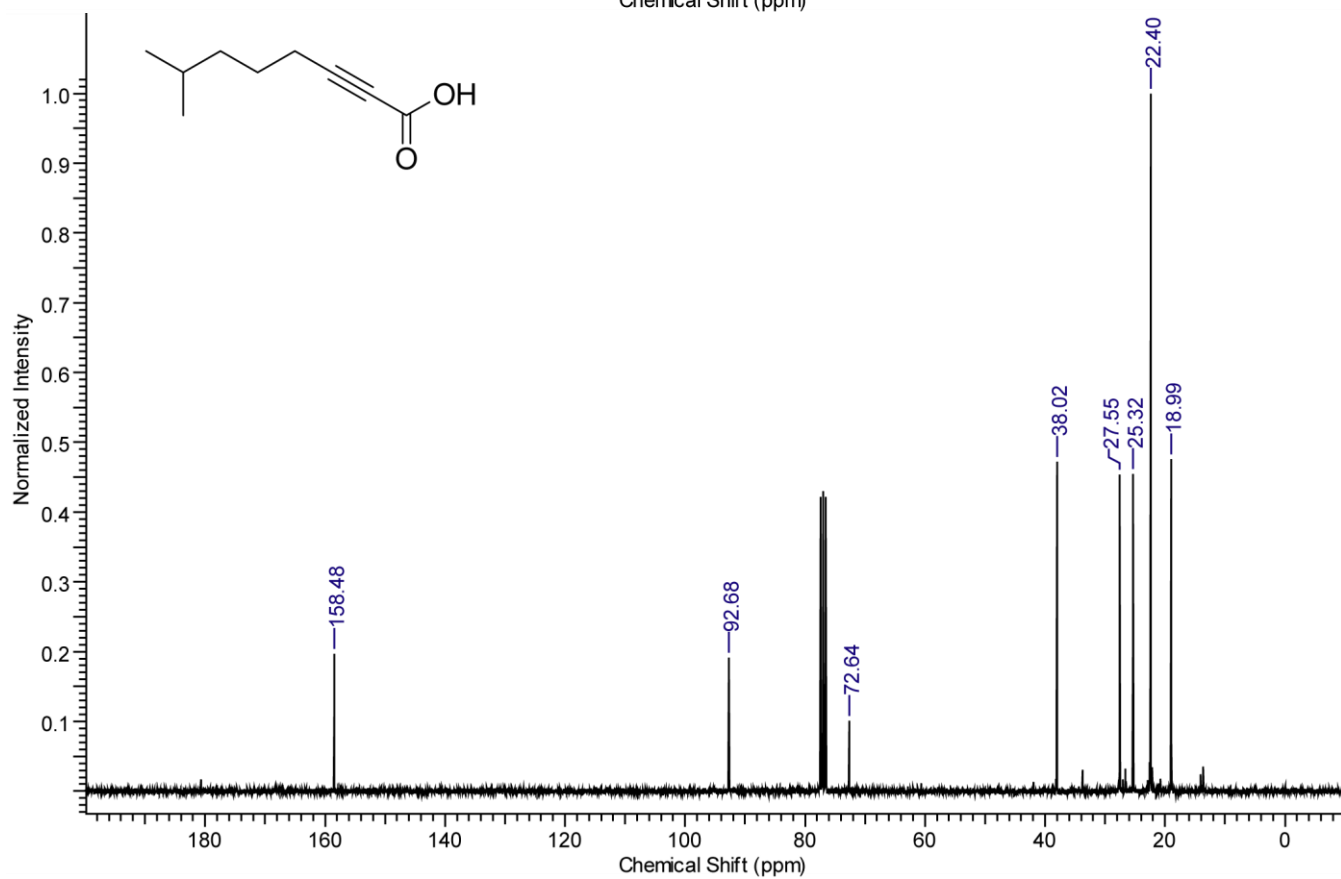

## SUPPORTING INFORMATION

<sup>1</sup>H- and <sup>13</sup>C-NMR spectra of allyl pent-2-ynoate (**5d**)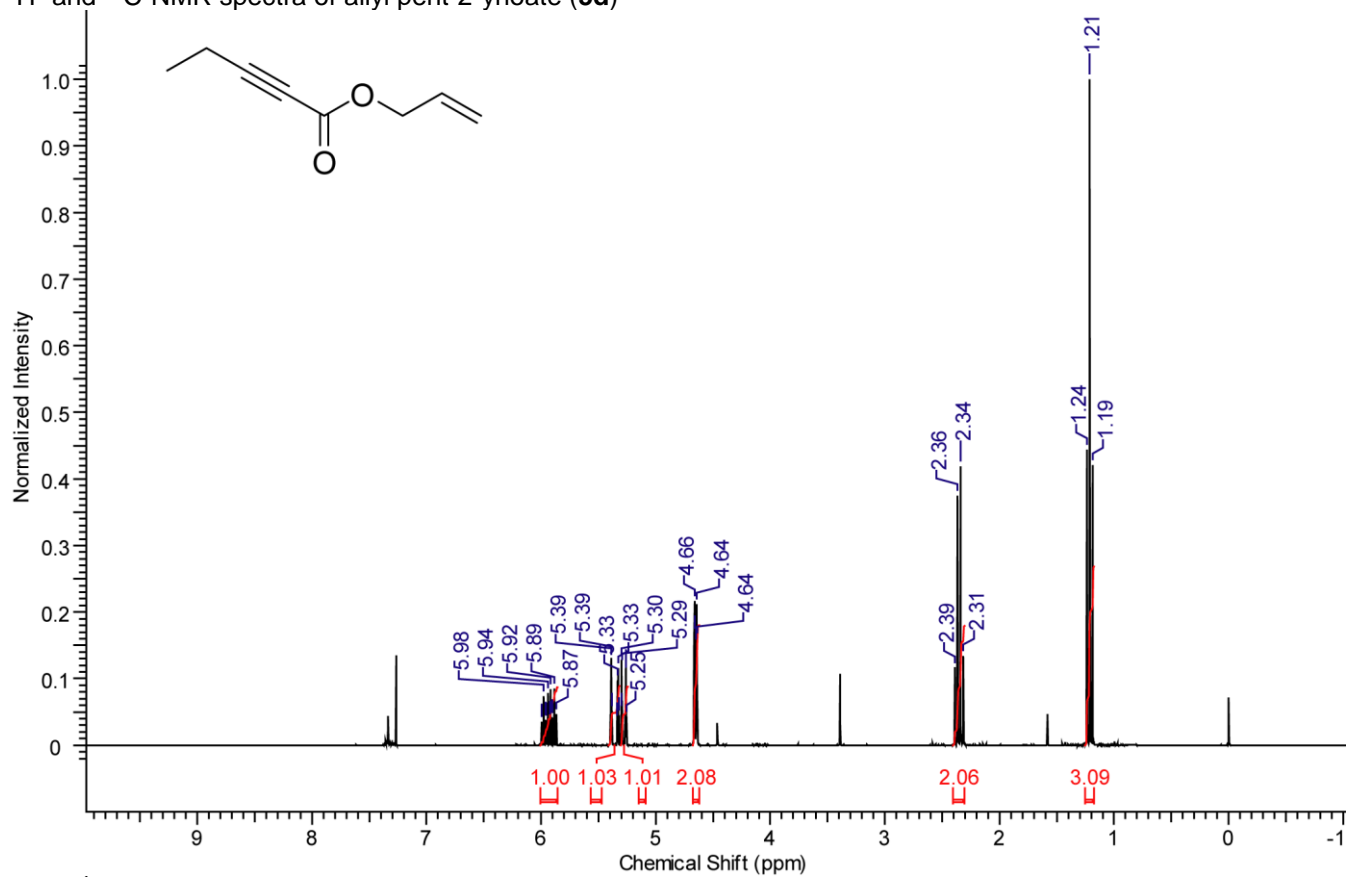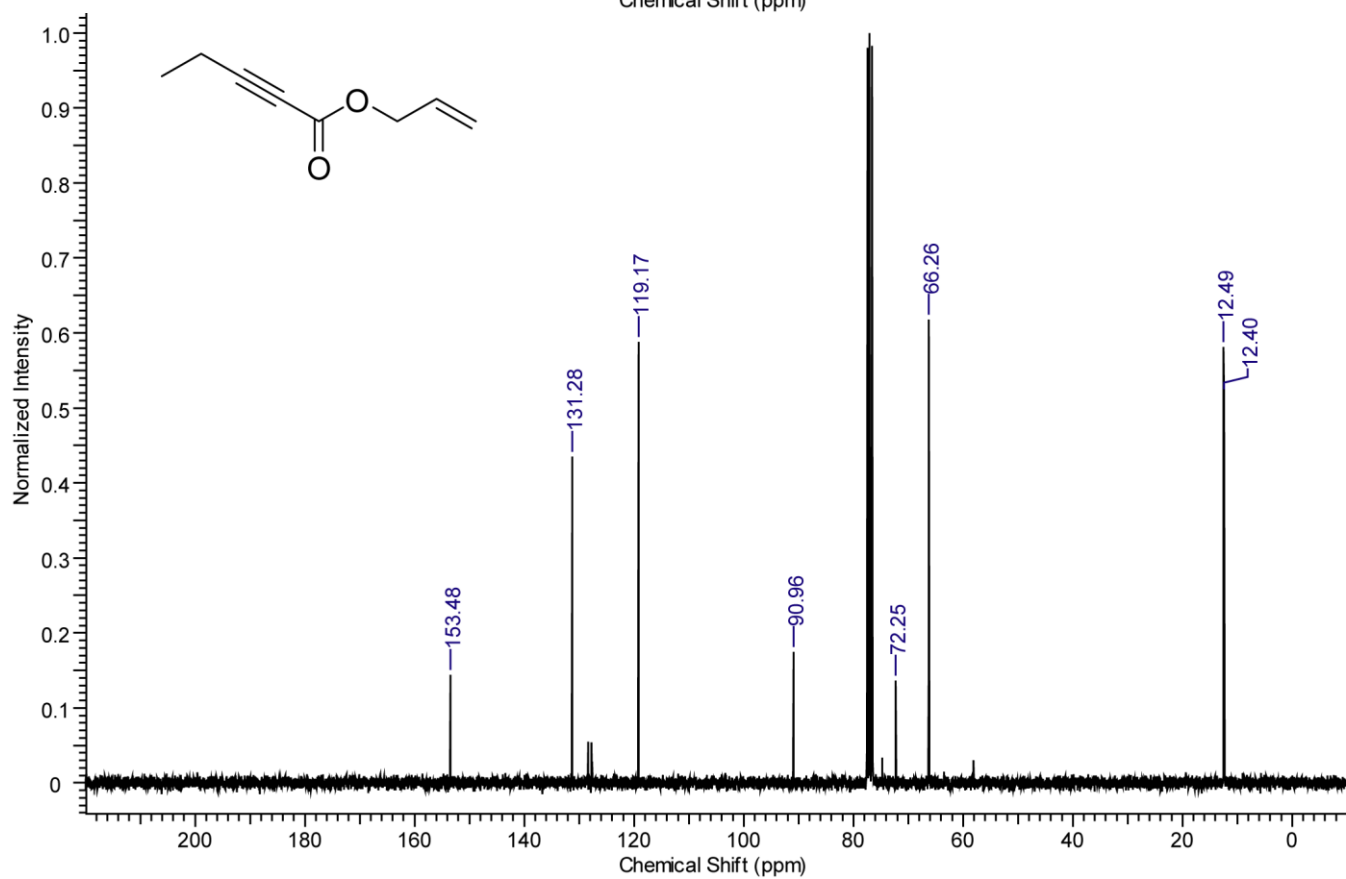

## SUPPORTING INFORMATION

<sup>1</sup>H- and <sup>13</sup>C-NMR spectra of allyl 4-methylpent-2-ynoate (**5e**)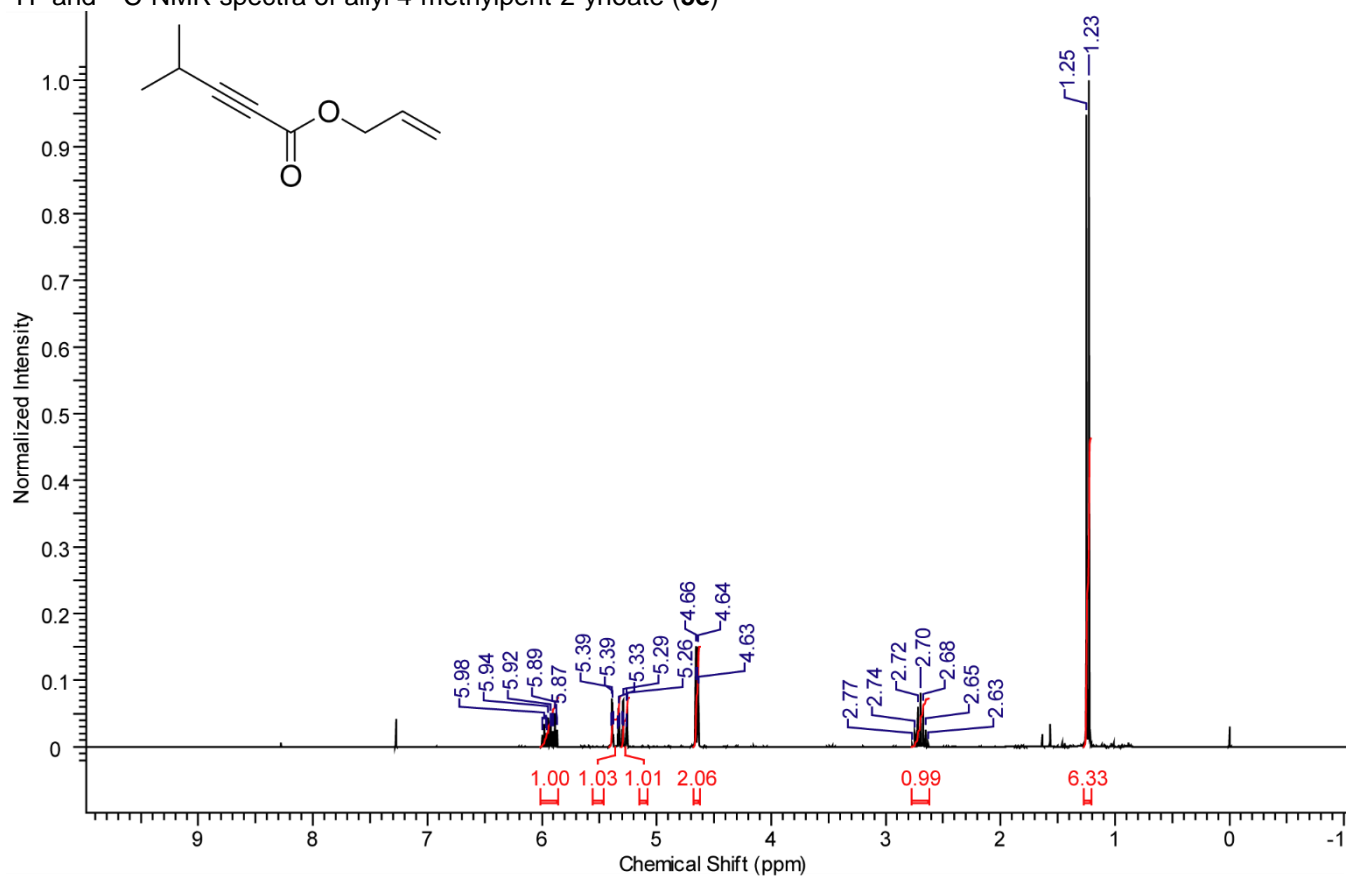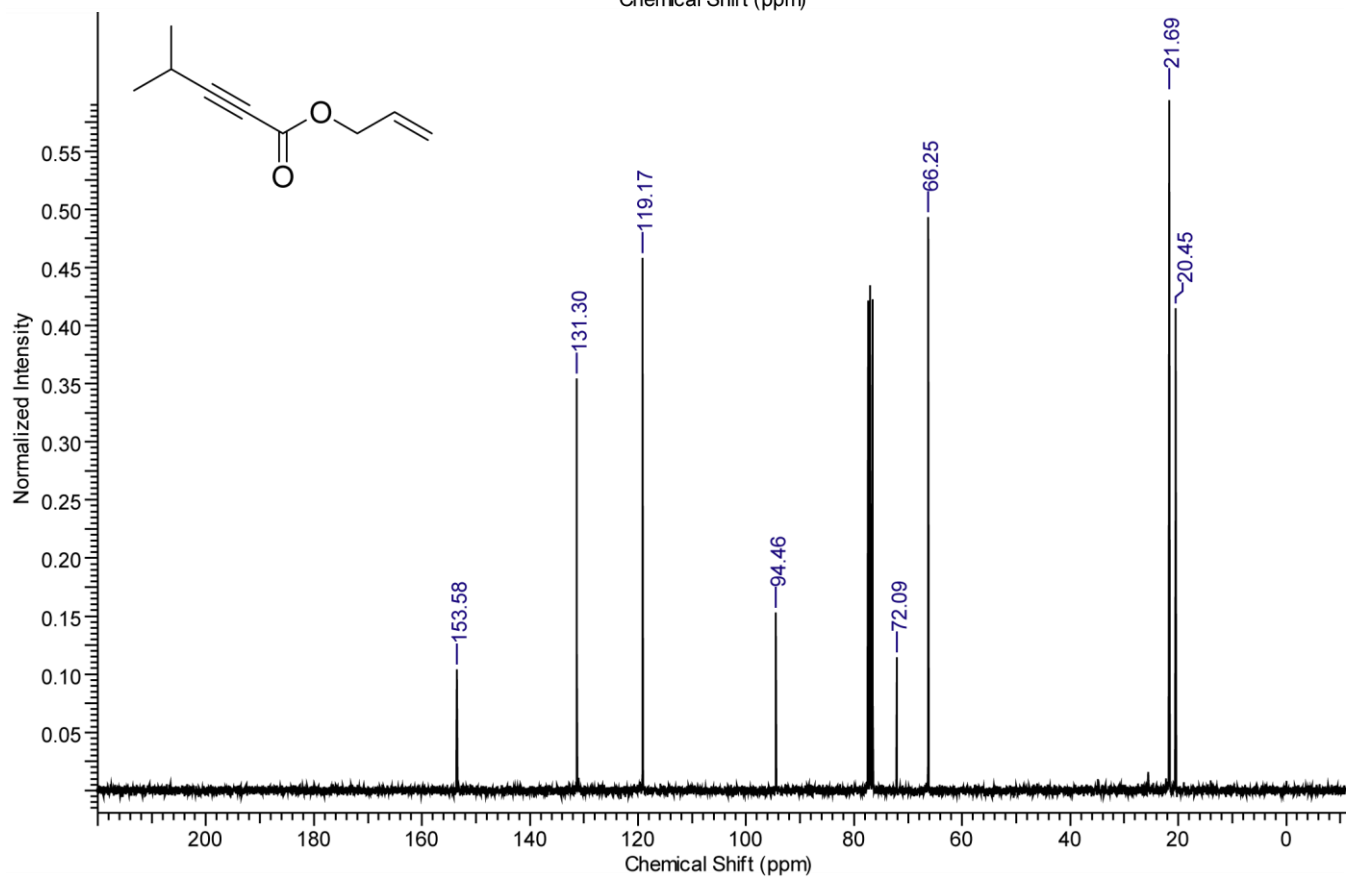



## SUPPORTING INFORMATION

<sup>1</sup>H- and <sup>13</sup>C-NMR spectra of allyl hex-2-ynoate (**5f**)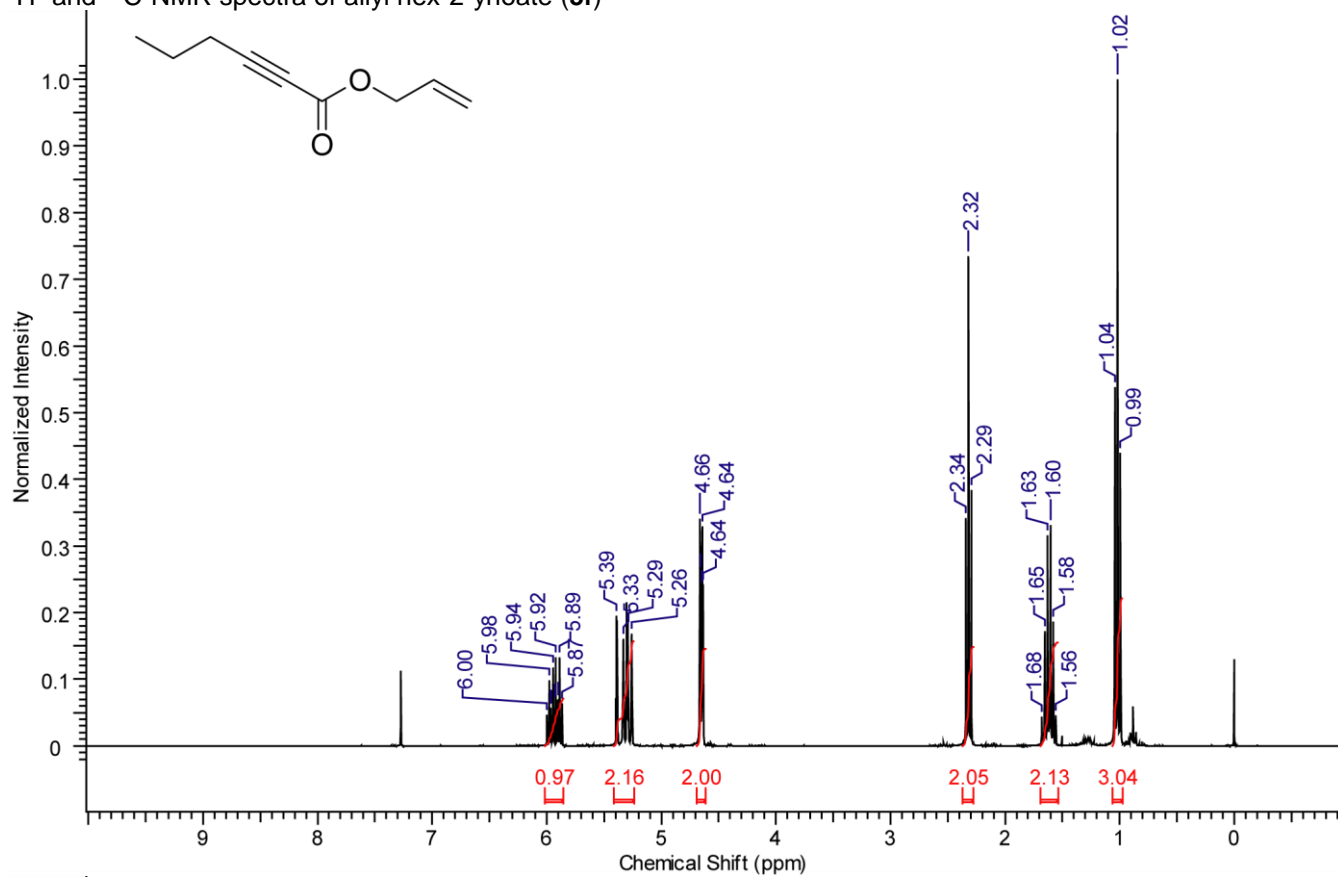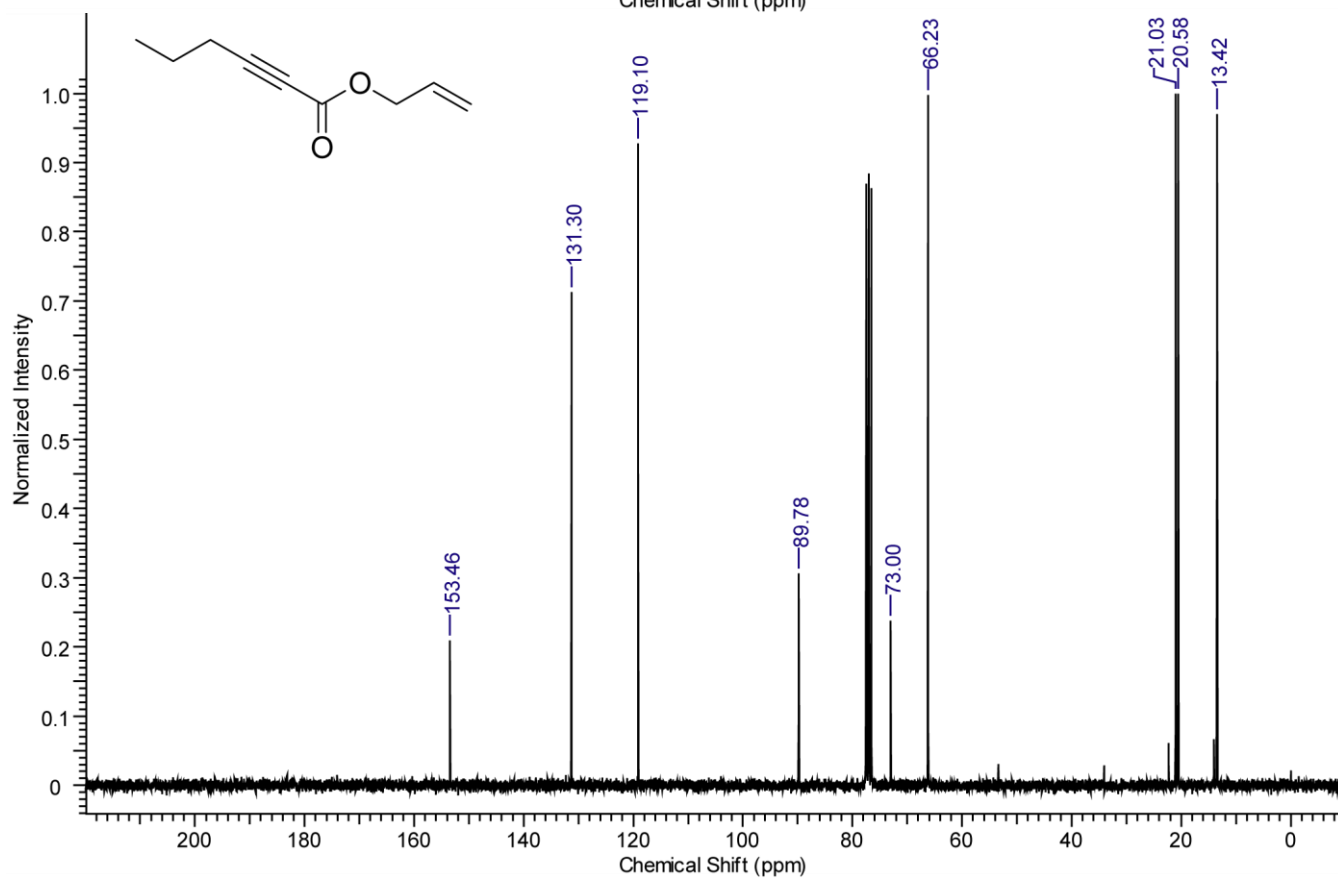

## SUPPORTING INFORMATION

<sup>1</sup>H- and <sup>13</sup>C-NMR spectra of allyl oct-2-ynoate (**5g**)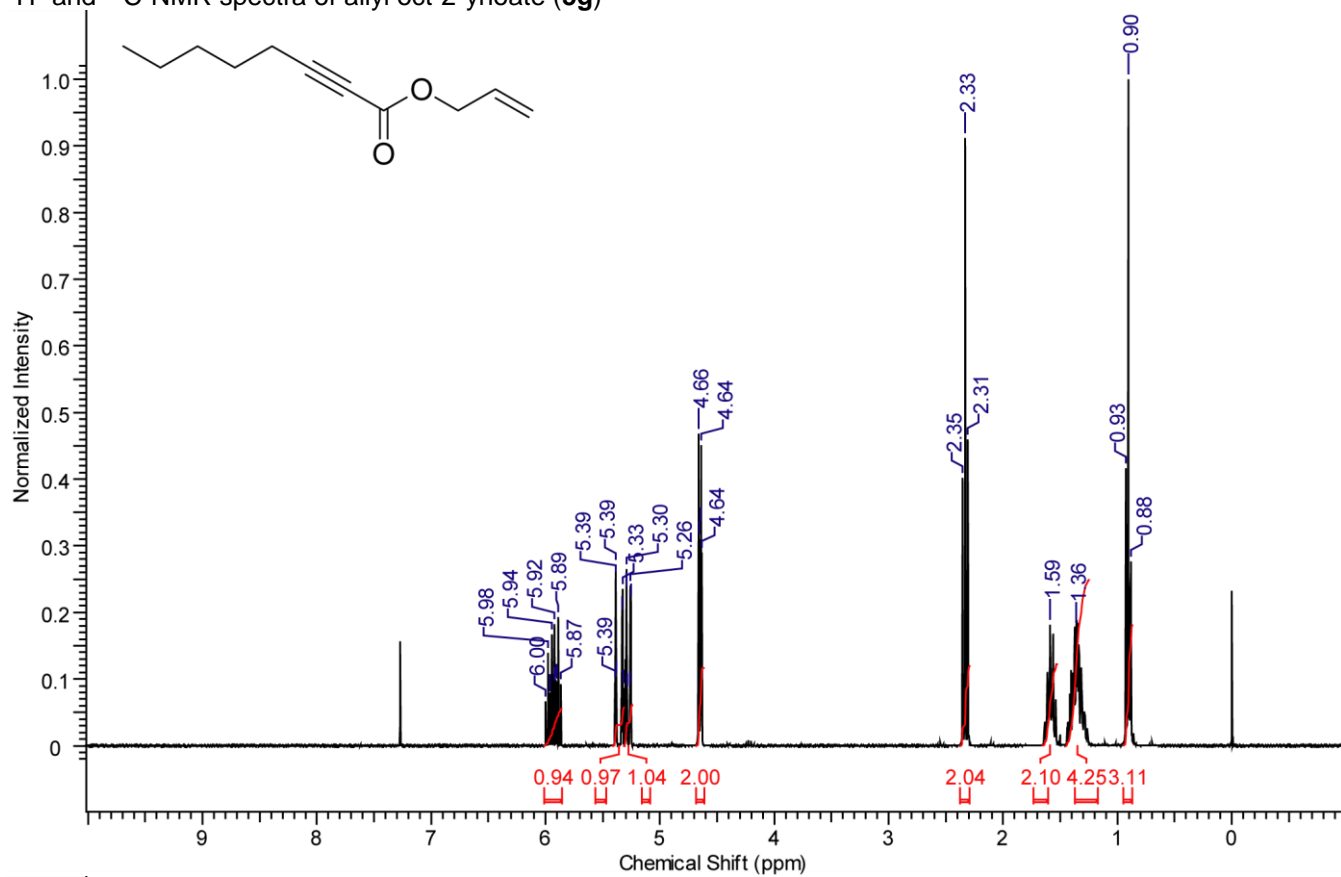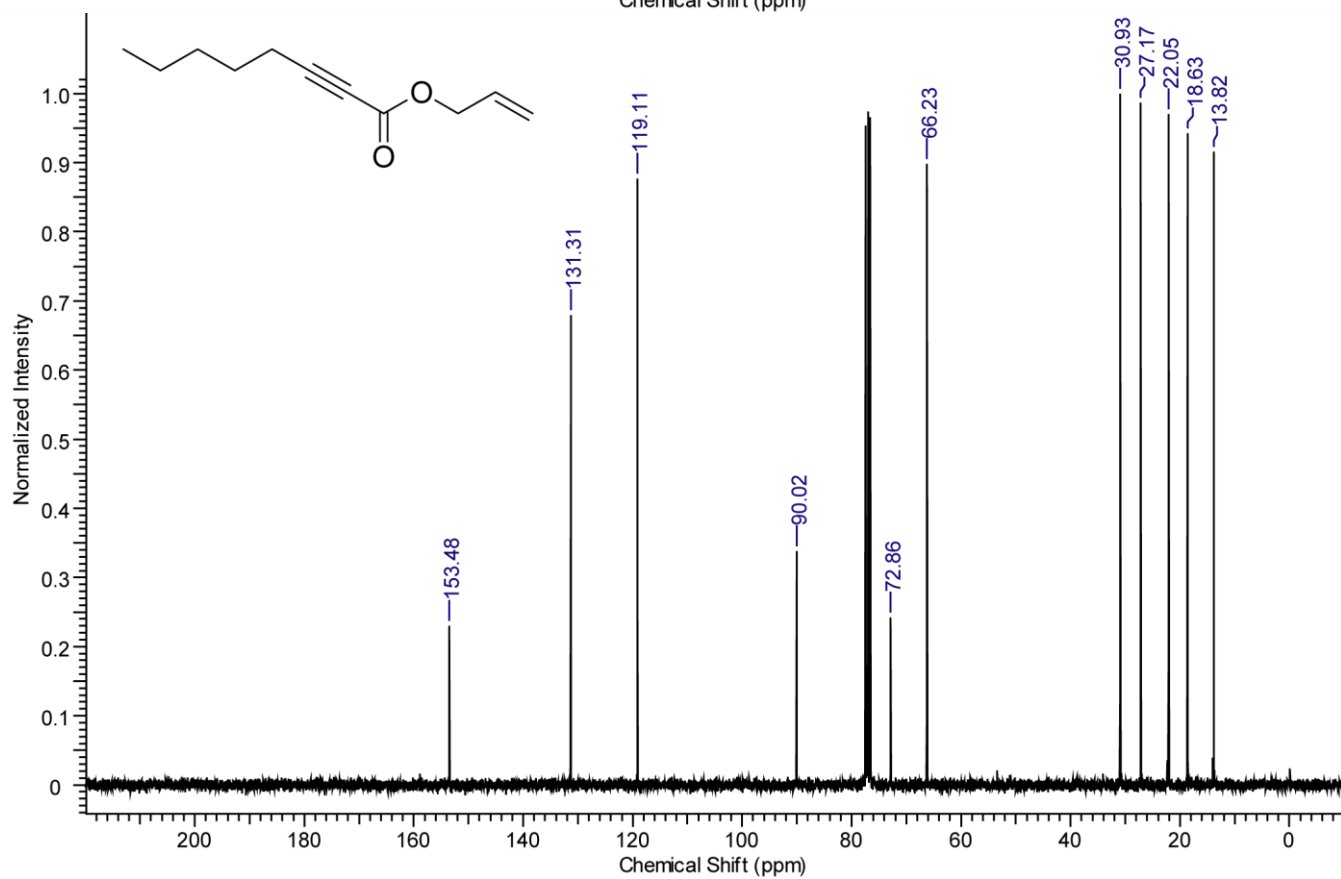

## SUPPORTING INFORMATION

<sup>1</sup>H- and <sup>13</sup>C-NMR spectra of allyl 6-methyloct-2-ynoate (**5h**)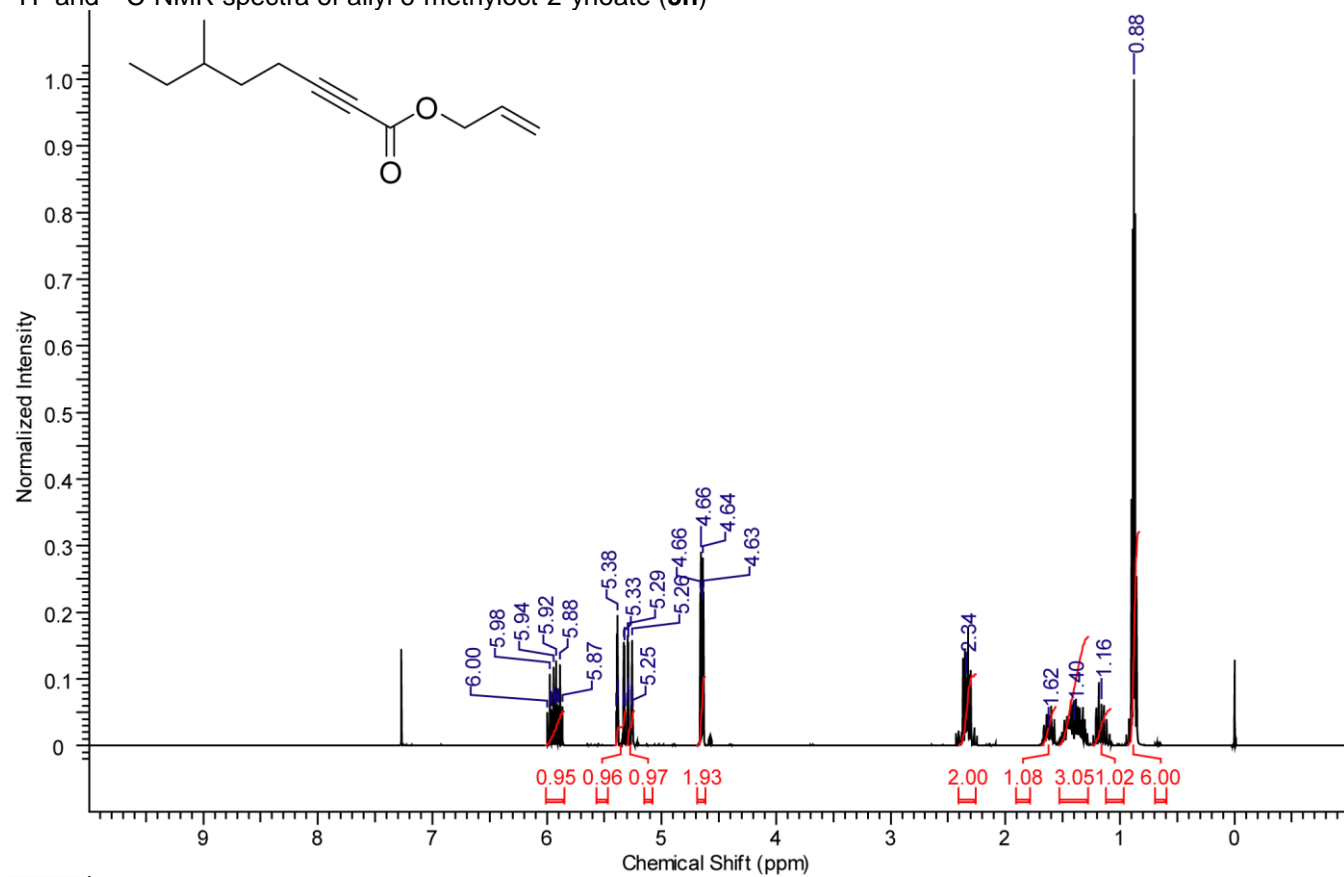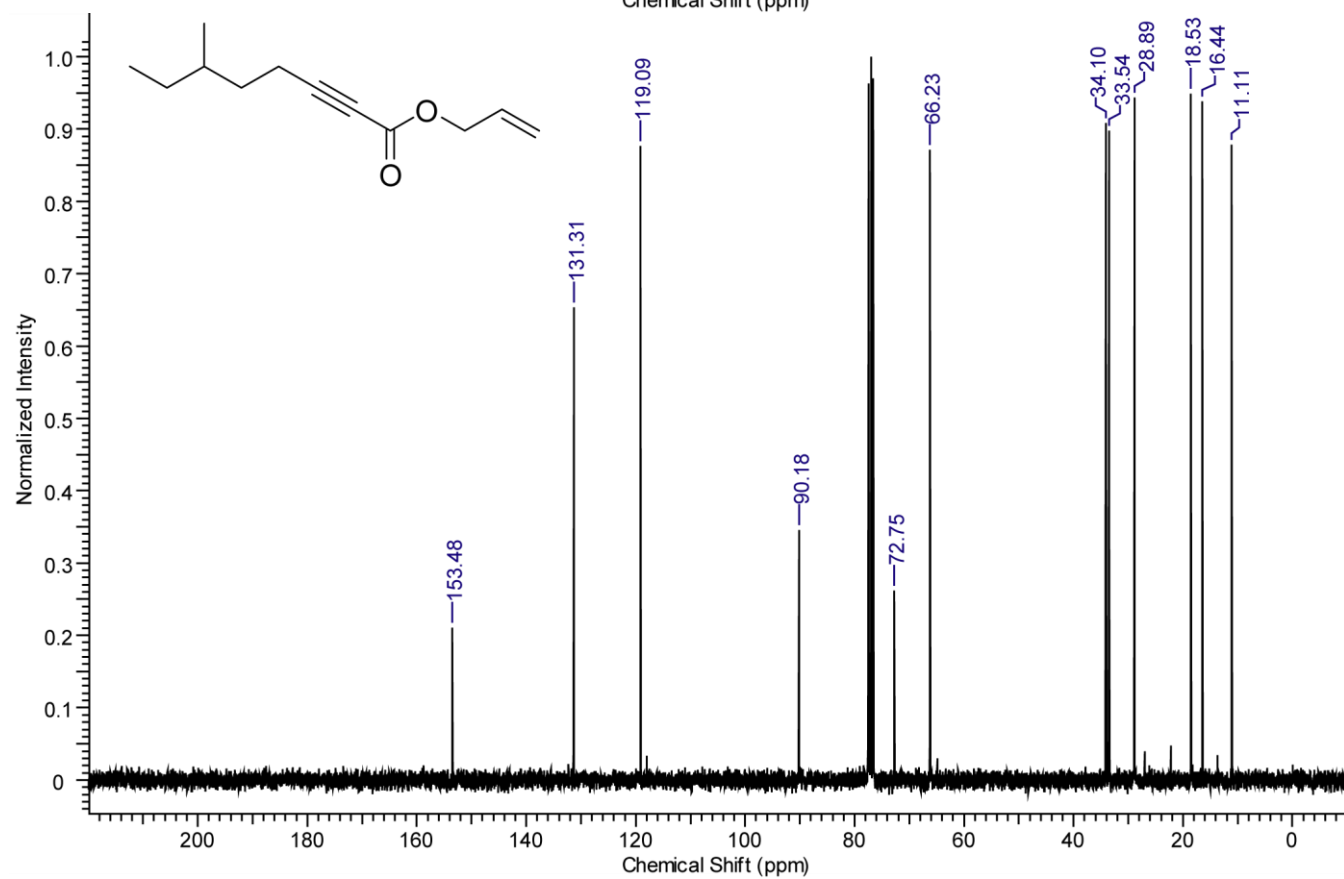

## SUPPORTING INFORMATION

<sup>1</sup>H- and <sup>13</sup>C-NMR spectra of allyl 7-methyloct-2-ynoate (**5i**)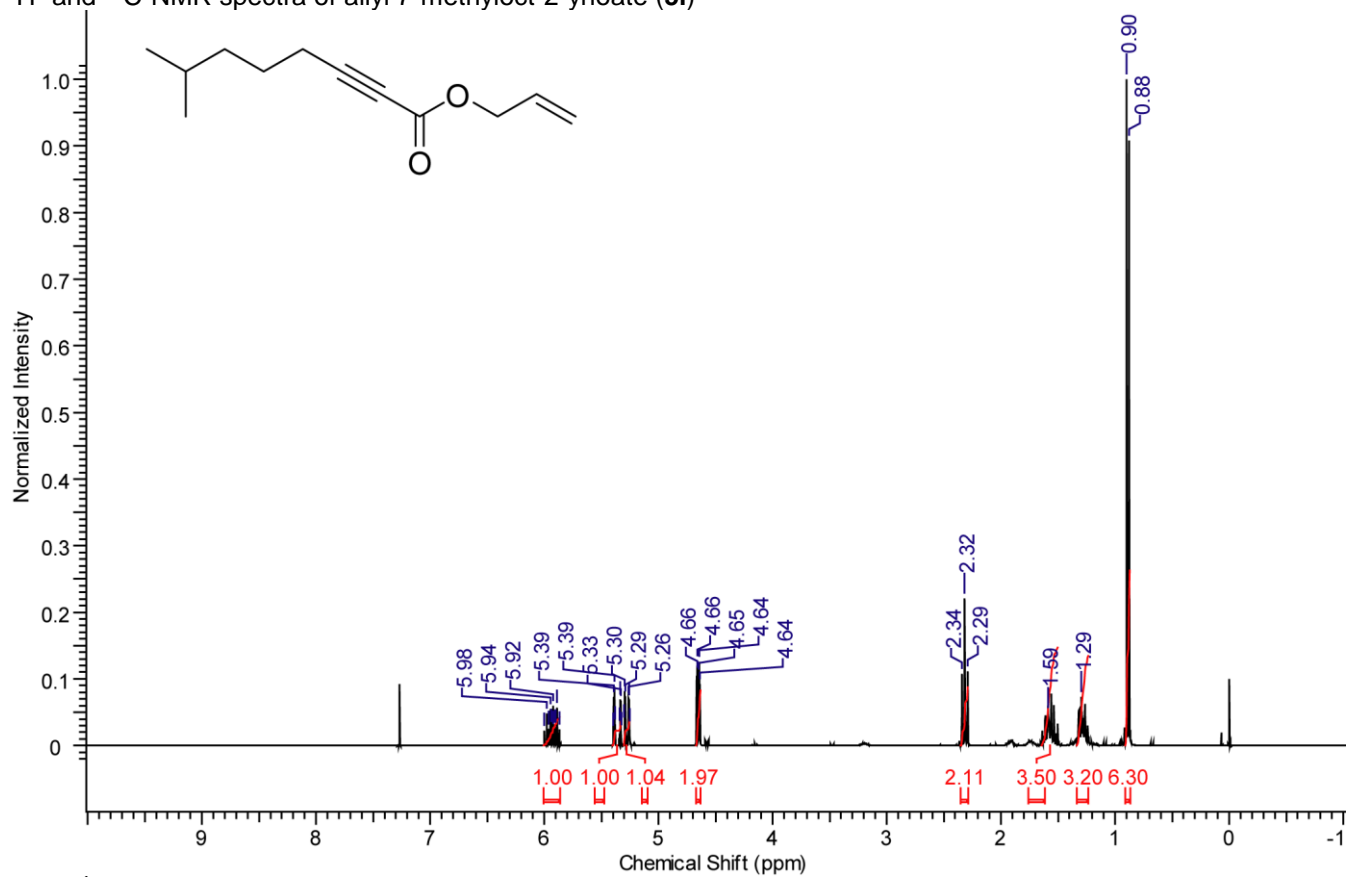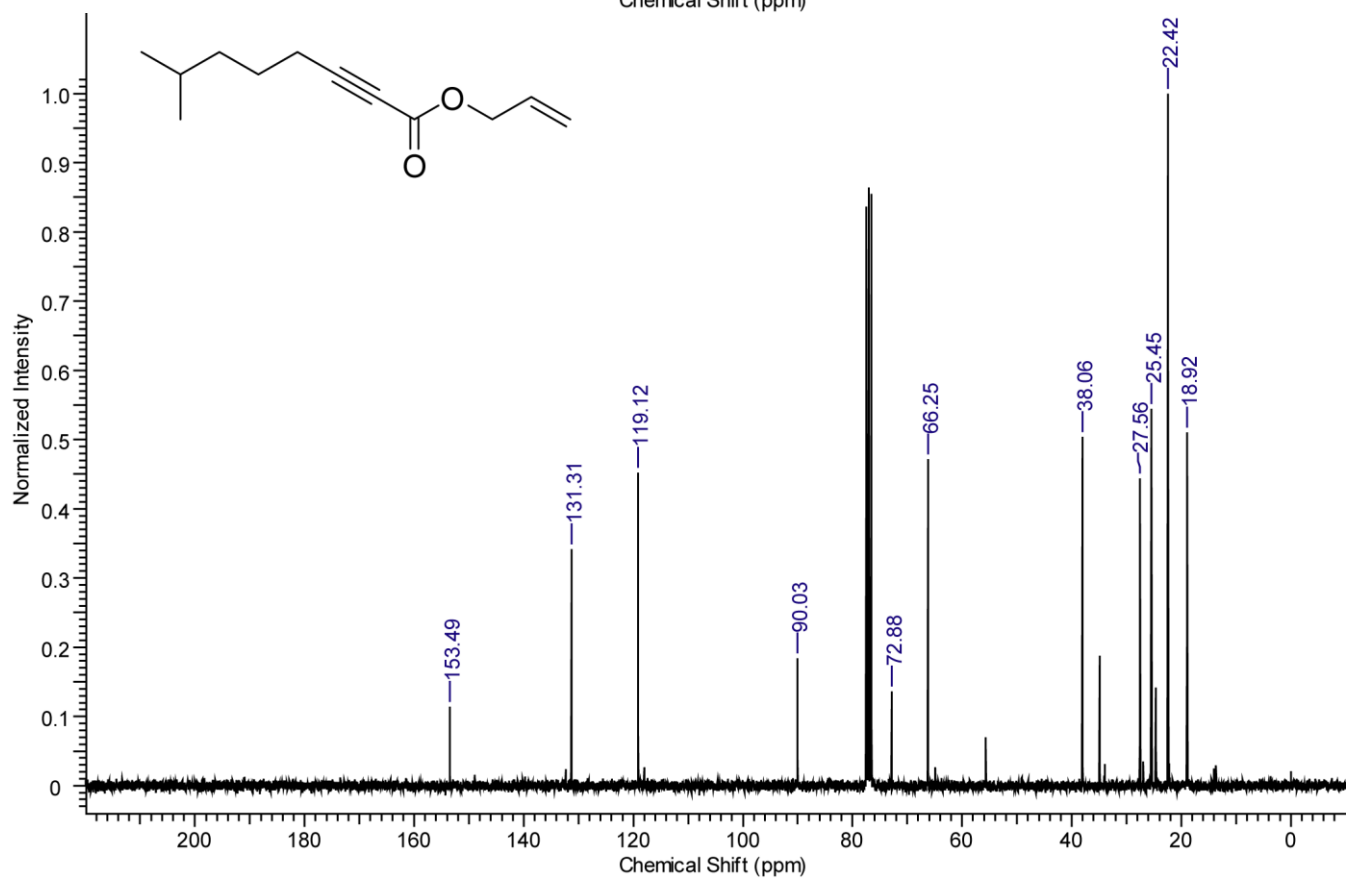

## SUPPORTING INFORMATION

<sup>1</sup>H- and <sup>13</sup>C-NMR spectra of 1-propanoyl-3-oxabicyclo[3.1.0]hexan-2-one (**1d**)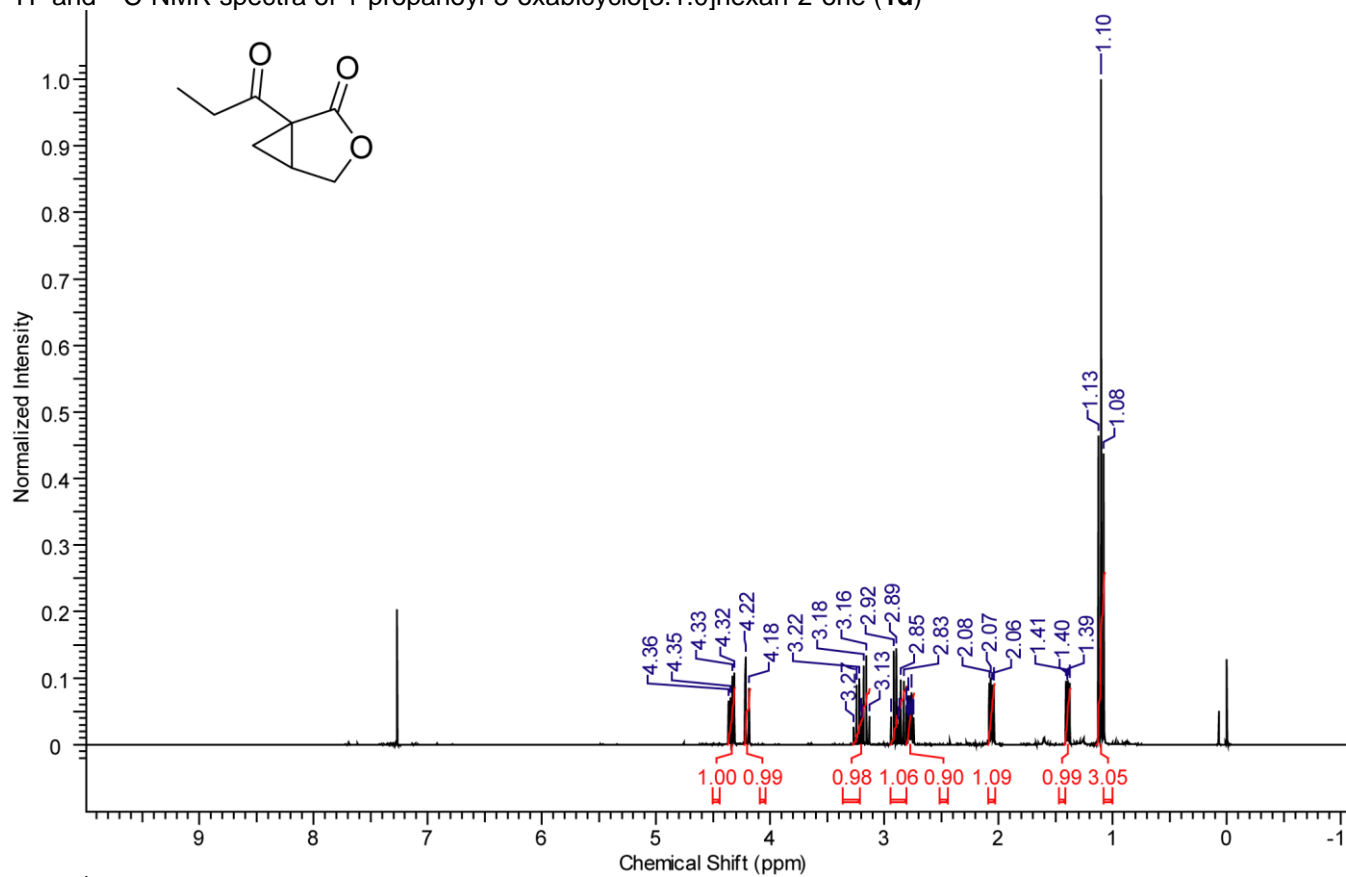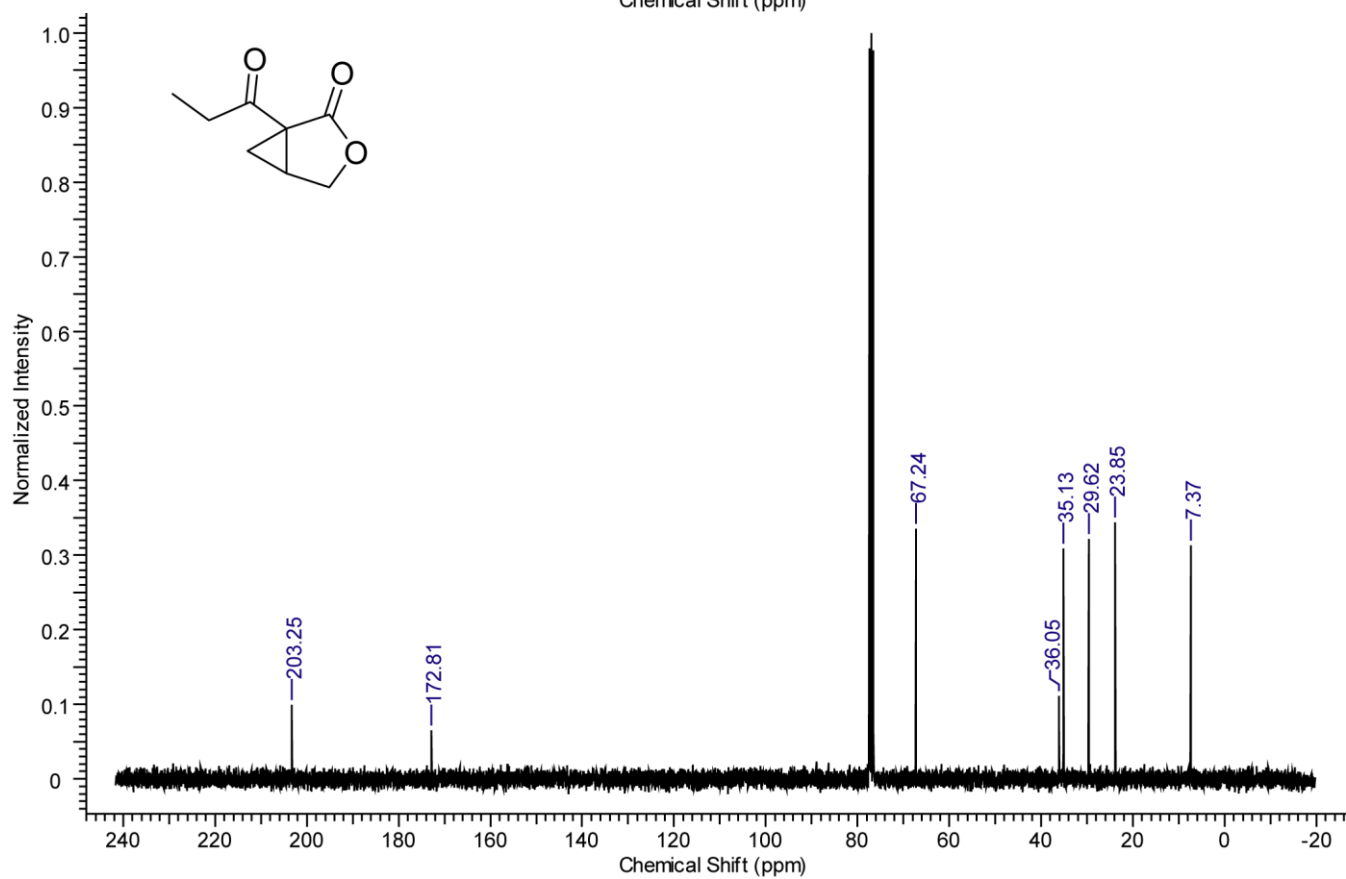



## SUPPORTING INFORMATION

HC-HMBC-NMR spectrum of 1-propanoyl-3-oxabicyclo[3.1.0]hexan-2-one (**1d**)

TU Braunschweig NMR-Labor d. Chem. Institute  
 Kunde Schlawis  
 Substanz-Code CS 109  
 Exp. HMBC  
 hmbcctgpl2nd.ibk\_35 CDC13 (D'w) nmr 1

```

Current Data Parameters
NAME      slr138418_06
EXPNO    1
PROCNO   1

F2 - Acquisition Parameters
Date_    20190401
Time     12.42 h
INSTRUM  AVILLHD500
PROBHD   Z125869.0055_1
PULPROG  hmbcctgpl2nd
TD        6648
SOLVENT  CDC13
NS        4
DS        16
SWH       1951.600 Hz
FIDRES    1.905860 Hz
AQ        0.5246976 sec
RG         186.82
DR         259.200 use
TE         298.0 K
CNS176    120.0000000
CNS177    170.0000000
CNS178    8.0000000
CNS179    0.00000300 sec
CNS180    2.00000000 sec
CNS181    0.06250000 sec
CNS182    0.00020000 sec
CNS183    0.00001920 sec
SPARSELI  0
TD0AV     1
SFO1      500.3213258 MHz
NUC1      1H
P1         10.00 use
P2         20.00 use
PLW1      18.00000000 W
SFO2      125.8188775 MHz
PC2       8.50 use
P3         15.00 use
P4         2000.00 use
PLW2      76.73300171 W
SFOAL7    C1p60ccmp-4
SFOAL7    0.500
SFOFFS7   0 Hz
SFW7      8.47049999 W
GFNAM(1)  SWSQ10.100
GFNAM(2)  SWSQ10.100
GFNAM(3)  SWSQ10.100
GF23      15.00 use
GFNAM(4)  SWSQ10.100
GF24      -10.00 use
GFNAM(5)  SWSQ10.100
GF25      -5.00 use
P16       1000.00 use

F1 - Acquisition parameters
TD        6648
SFO1      125.8188 MHz
FIDRES    203.450516 Hz
SW         206.977 ppm
F1MODE    Echo-Antiecho

F2 - Processing parameters
SI         2048
SF         500.3200164 MHz
SFOFF      SINE
SSB        4
LB         0 Hz
GB         0
PC         1.40
SR         16.39 Hz
HZpPT     0.952930 Hz

F1 - Processing parameters
SI         1024
  
```

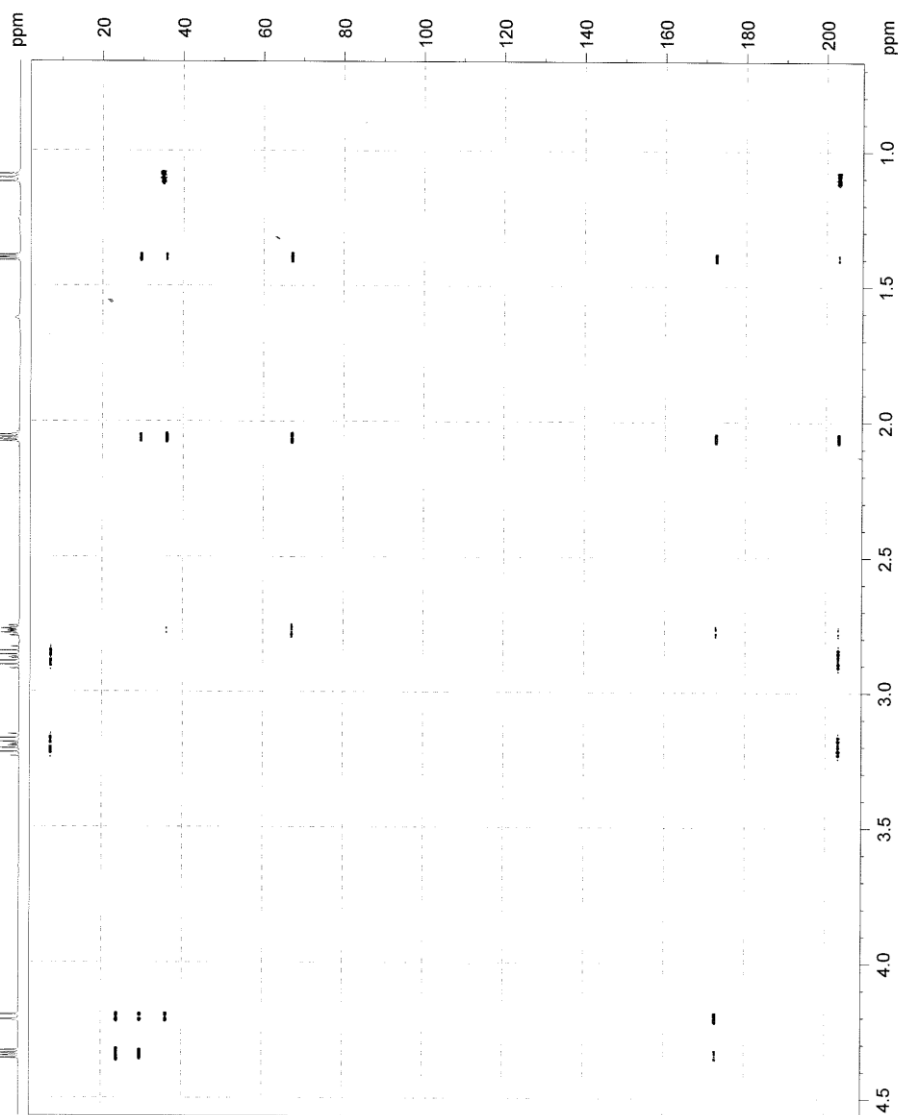

## SUPPORTING INFORMATION

<sup>1</sup>H- and <sup>13</sup>C-NMR spectra of 1-(2-methylpropanoyl)-3-oxabicyclo[3.1.0]hexan-2-one (**1e**)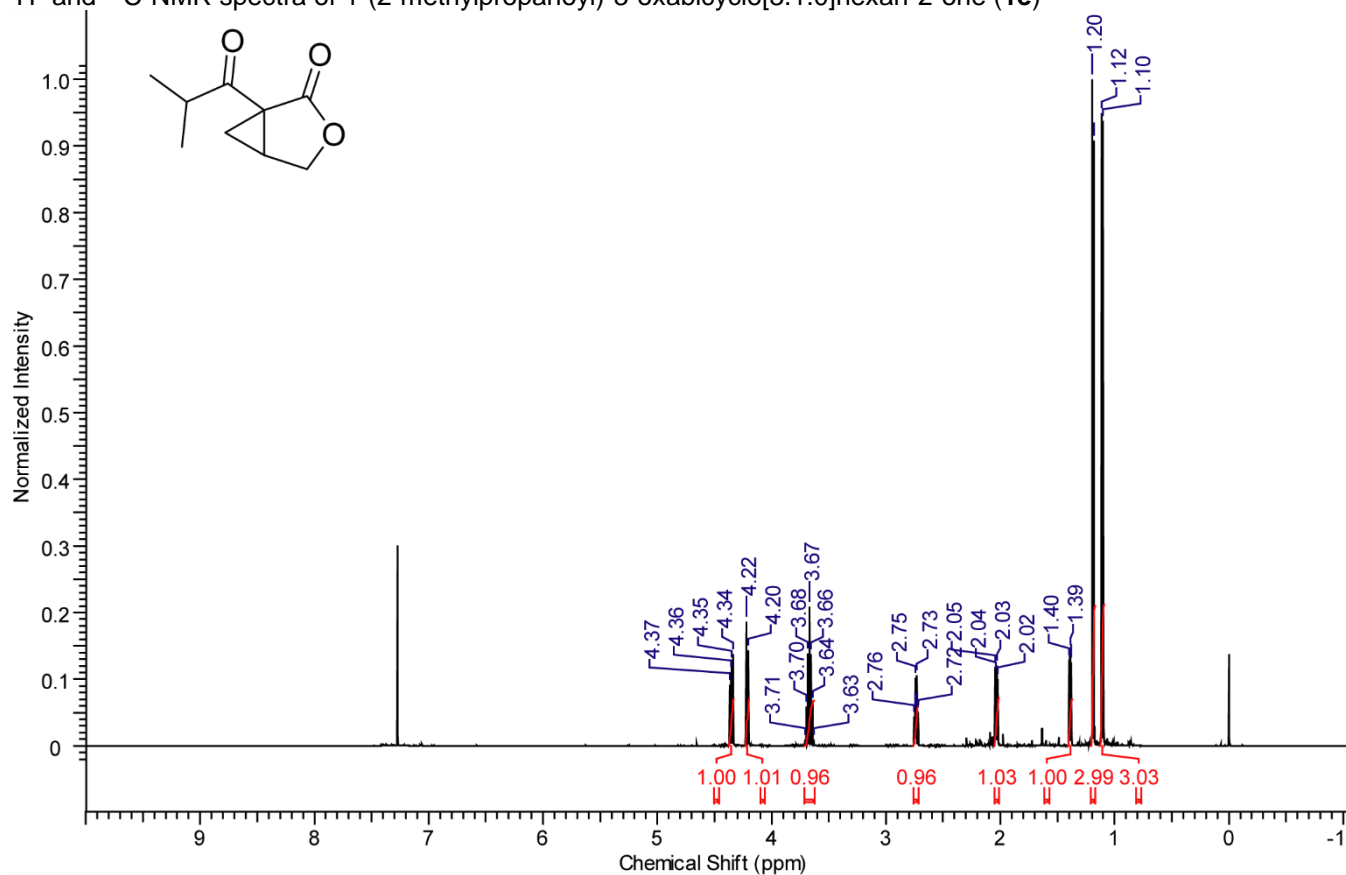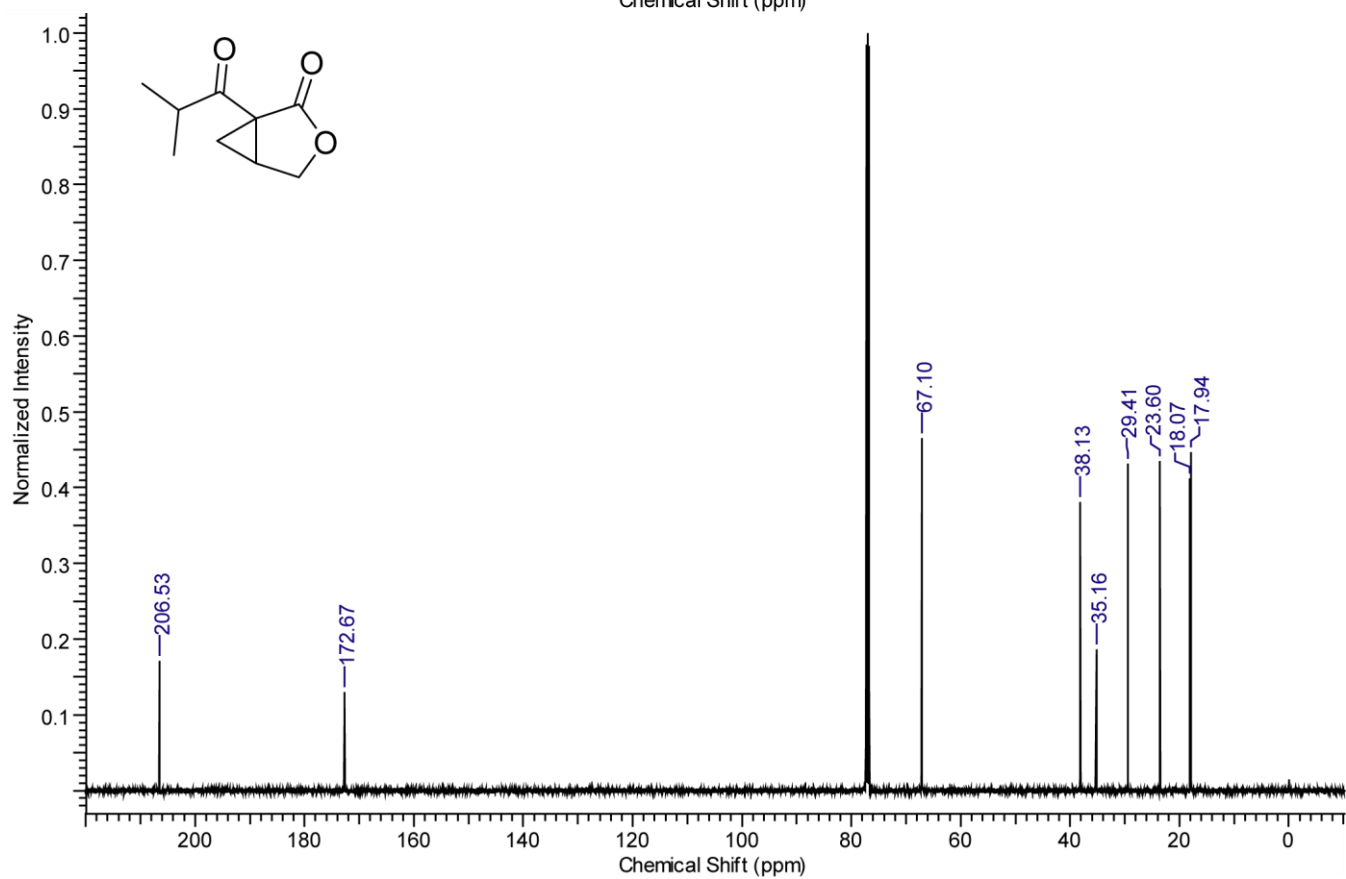





SUPPORTING INFORMATION

HC-HMBC-NMR spectrum of 1-(2-methylpropanoyl)-3-oxabicyclo[3.1.0]hexan-2-one (1e)

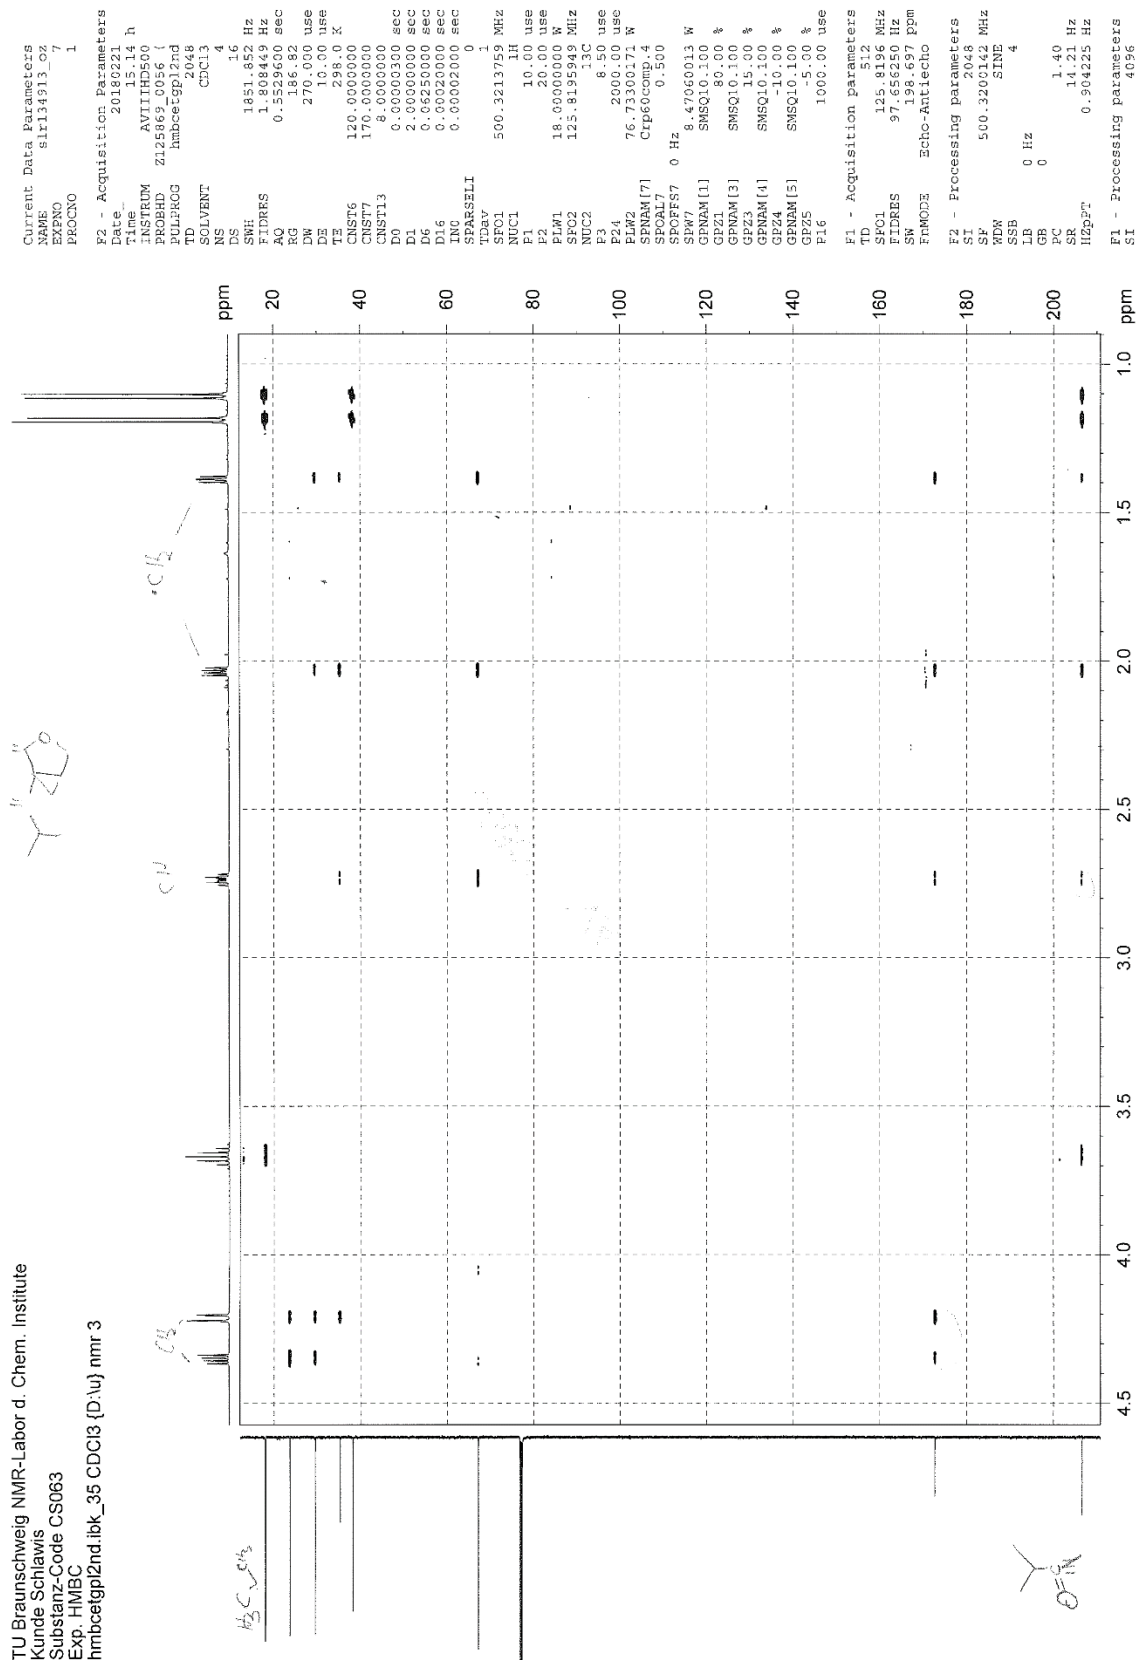

## SUPPORTING INFORMATION

<sup>1</sup>H- and <sup>13</sup>C-NMR spectra of 1-butanoyl-3-oxabicyclo[3.1.0]hexan-2-one (**1f**)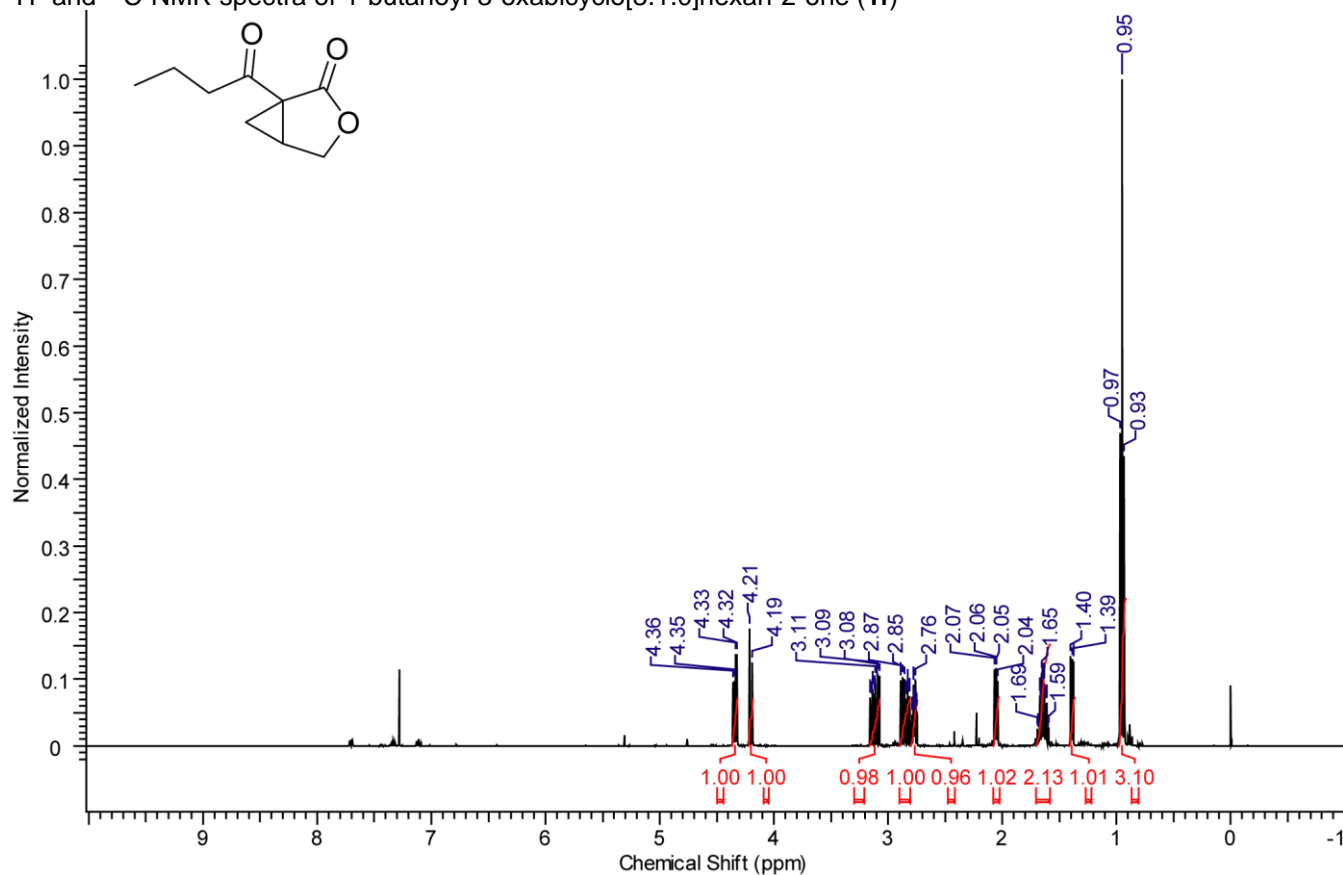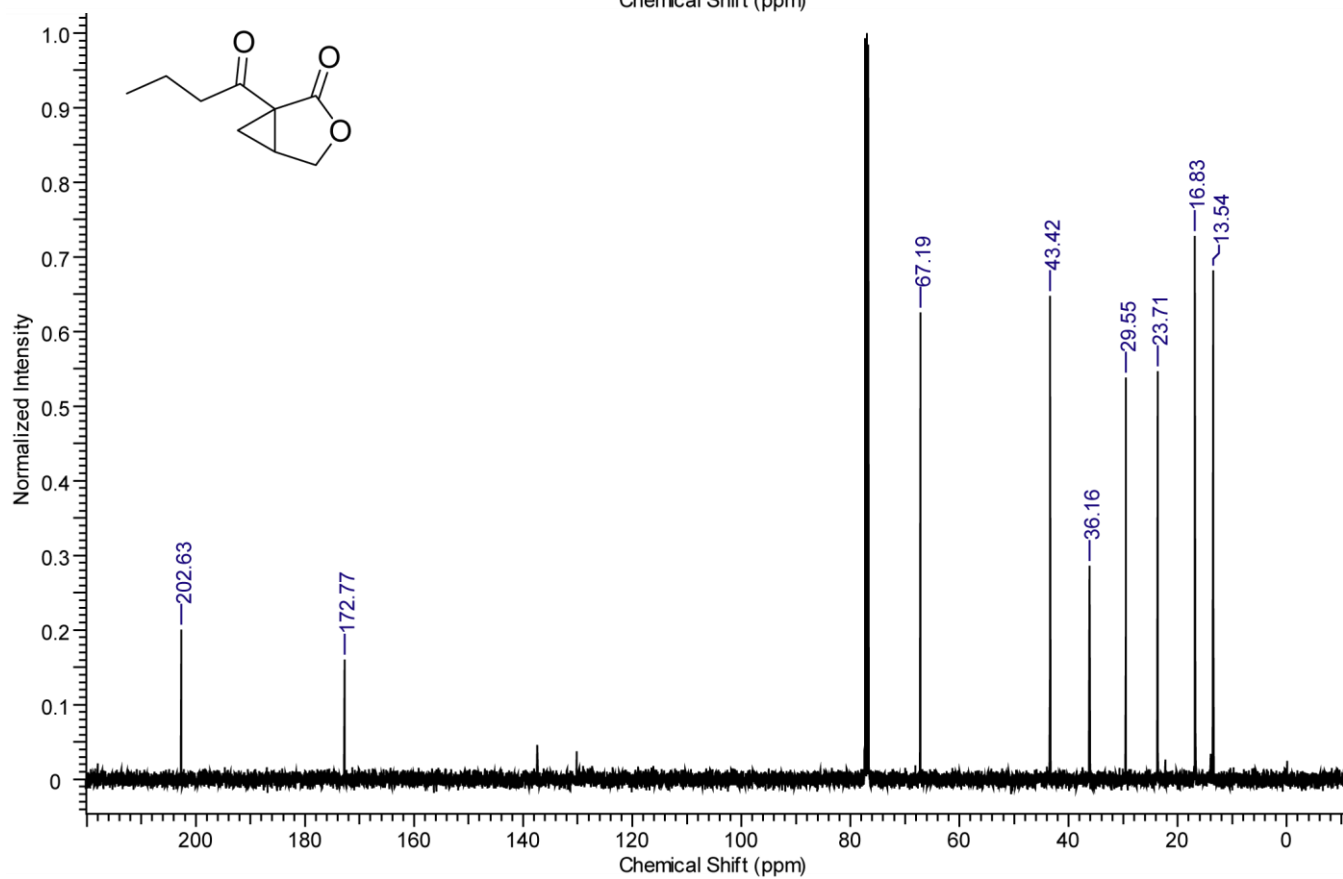



## SUPPORTING INFORMATION

HC-HMBC-NMR spectrum of 1-butanoyl-3-oxabicyclo[3.1.0]hexan-2-one (**1f**)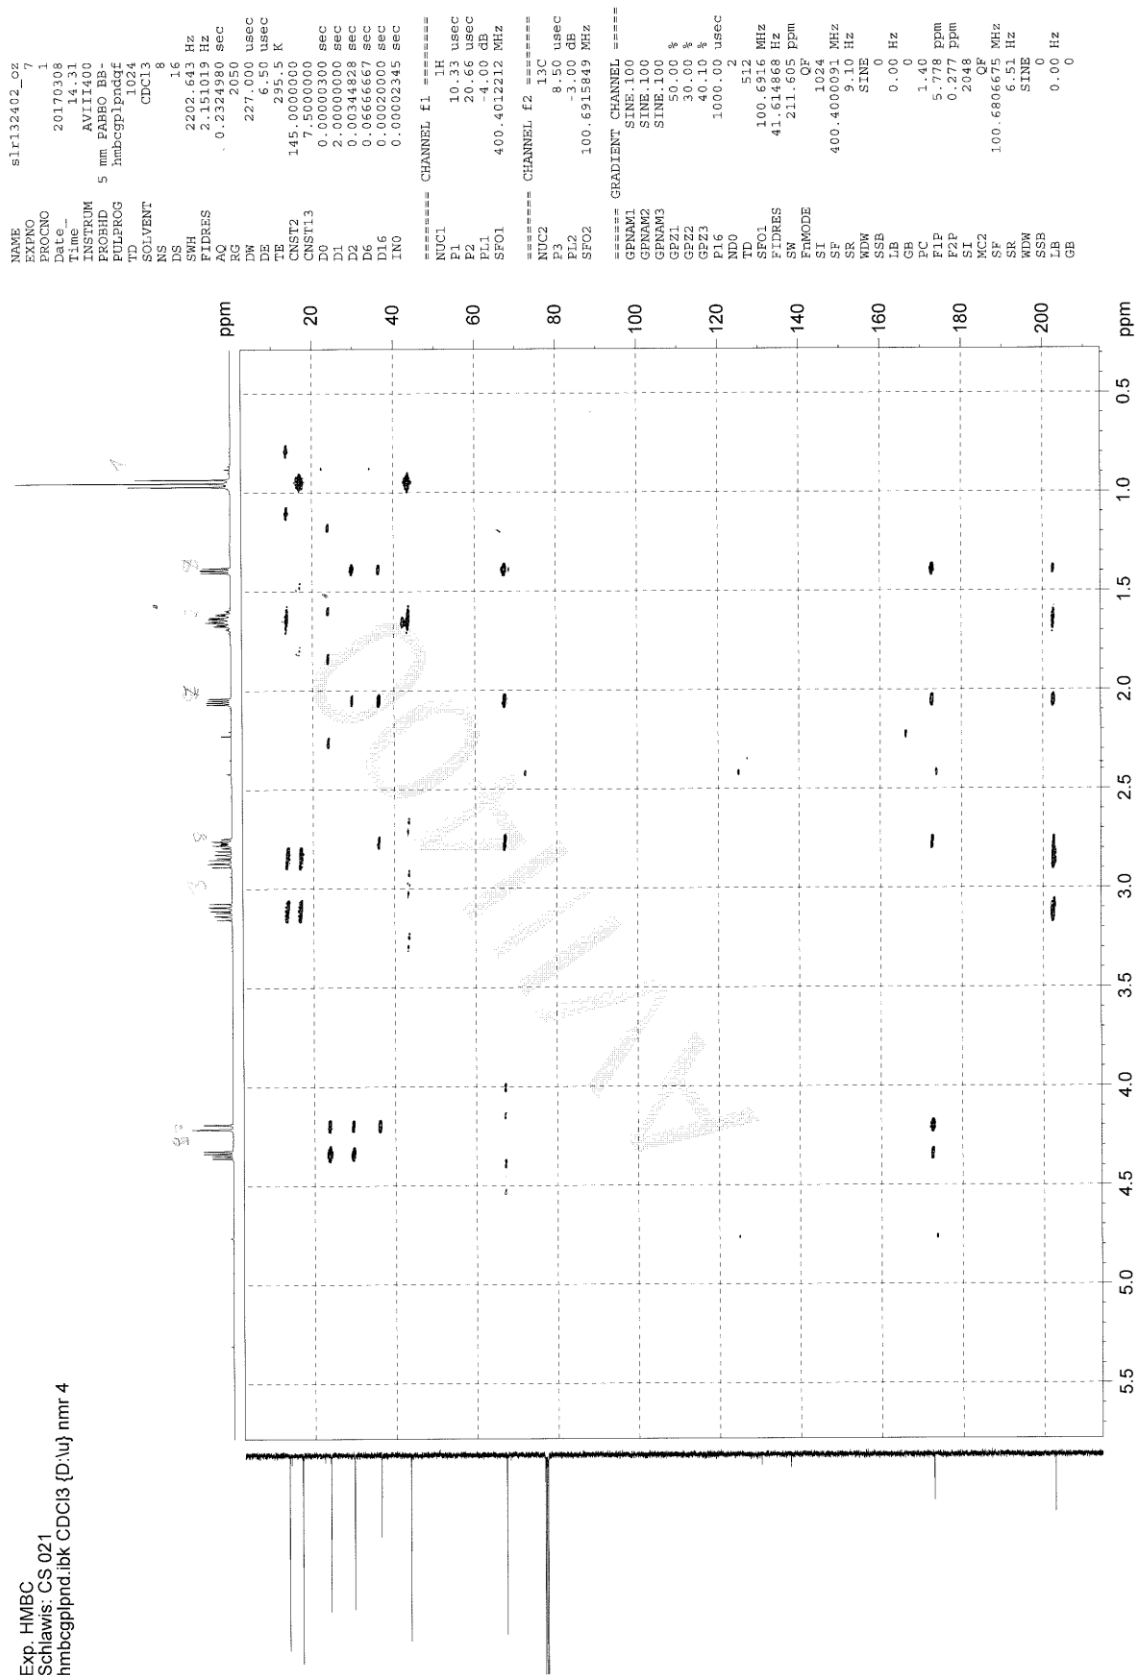

## SUPPORTING INFORMATION

<sup>1</sup>H- and <sup>13</sup>C-NMR spectra of 1-hexanoyl-3-oxabicyclo[3.1.0]hexan-2-one (**1g**)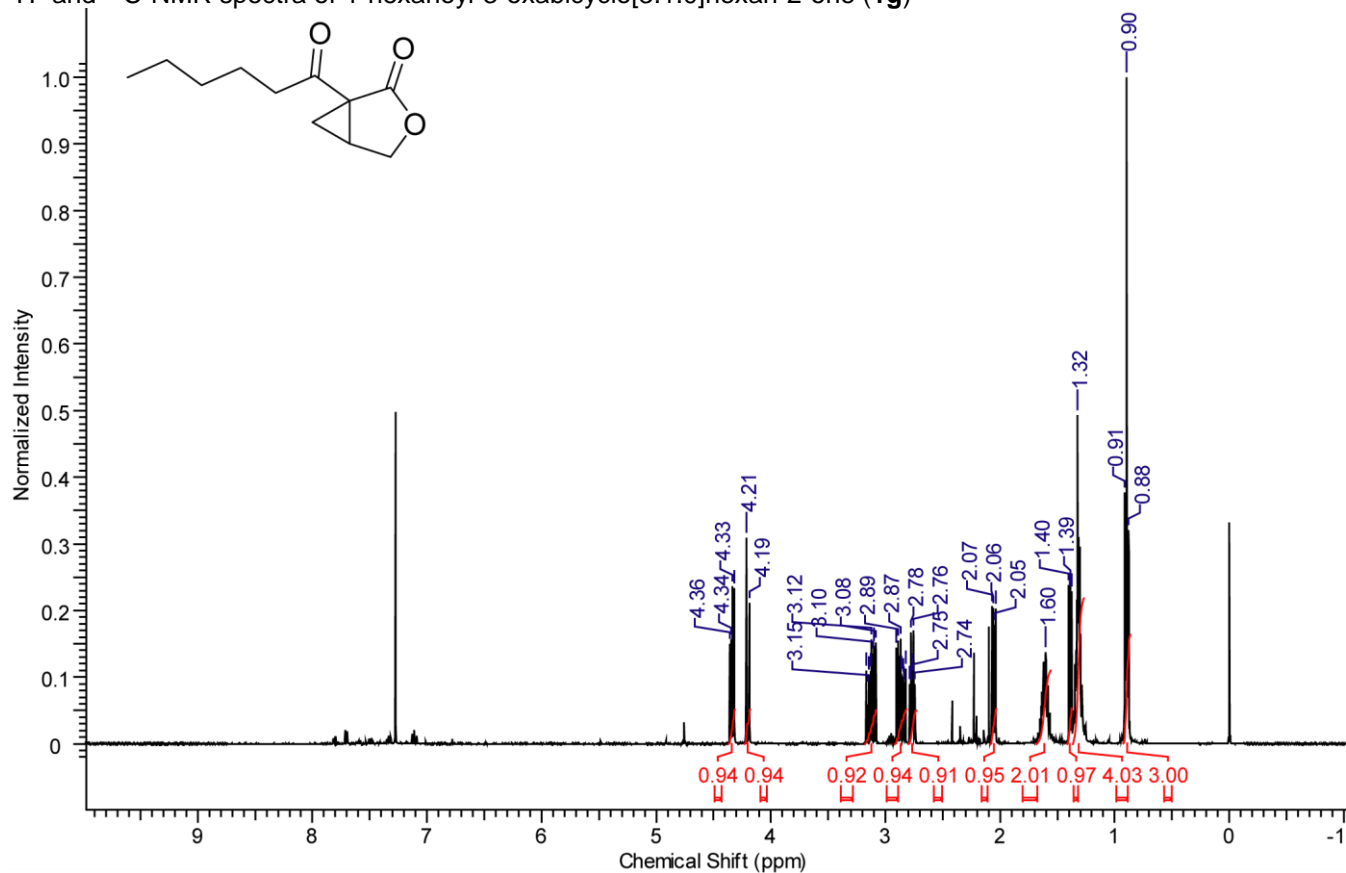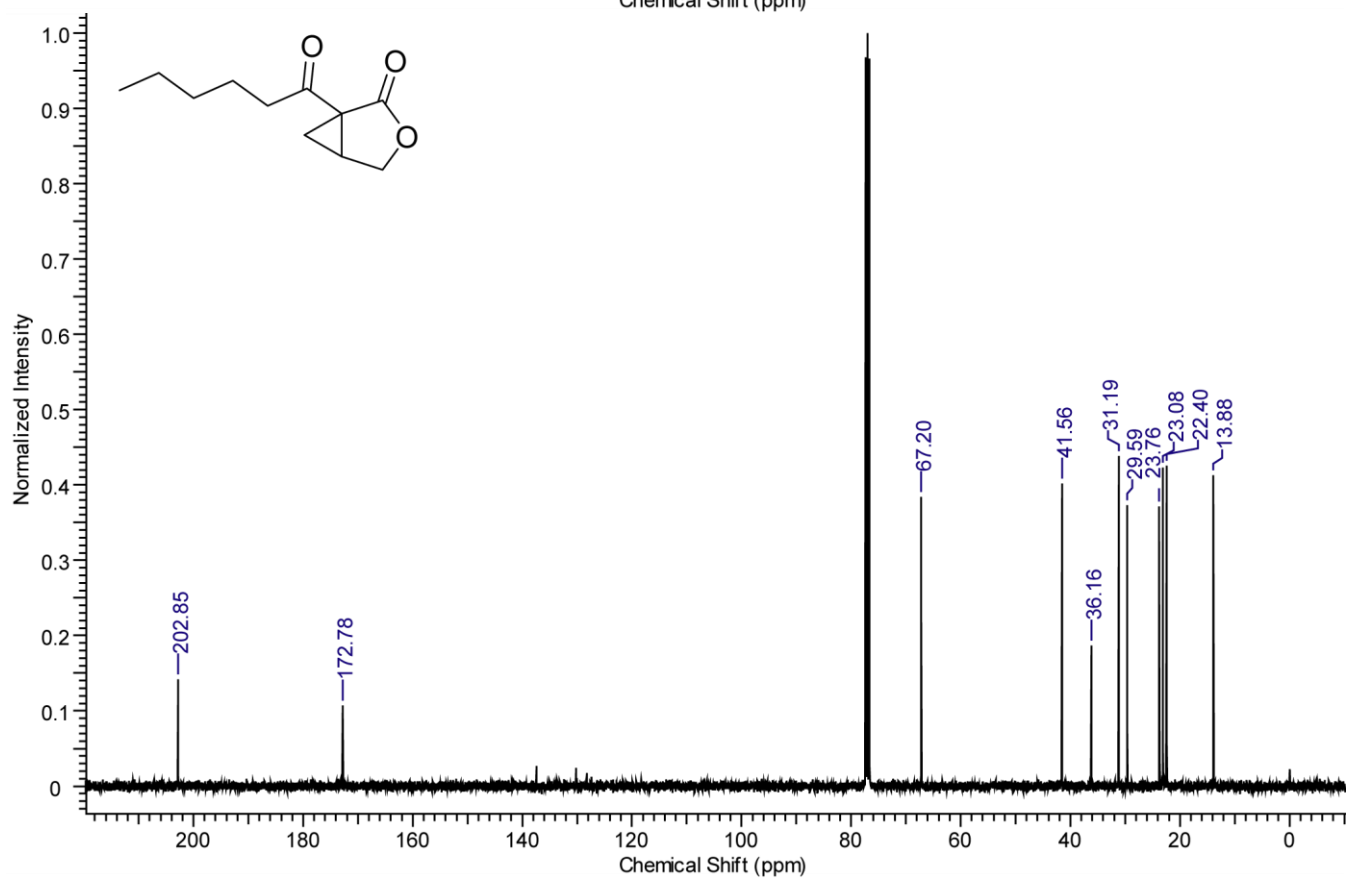

## SUPPORTING INFORMATION

HC-HSQC-NMR spectrum of 1-hexanoyl-3-oxabicyclo[3.1.0]hexan-2-one (**1g**)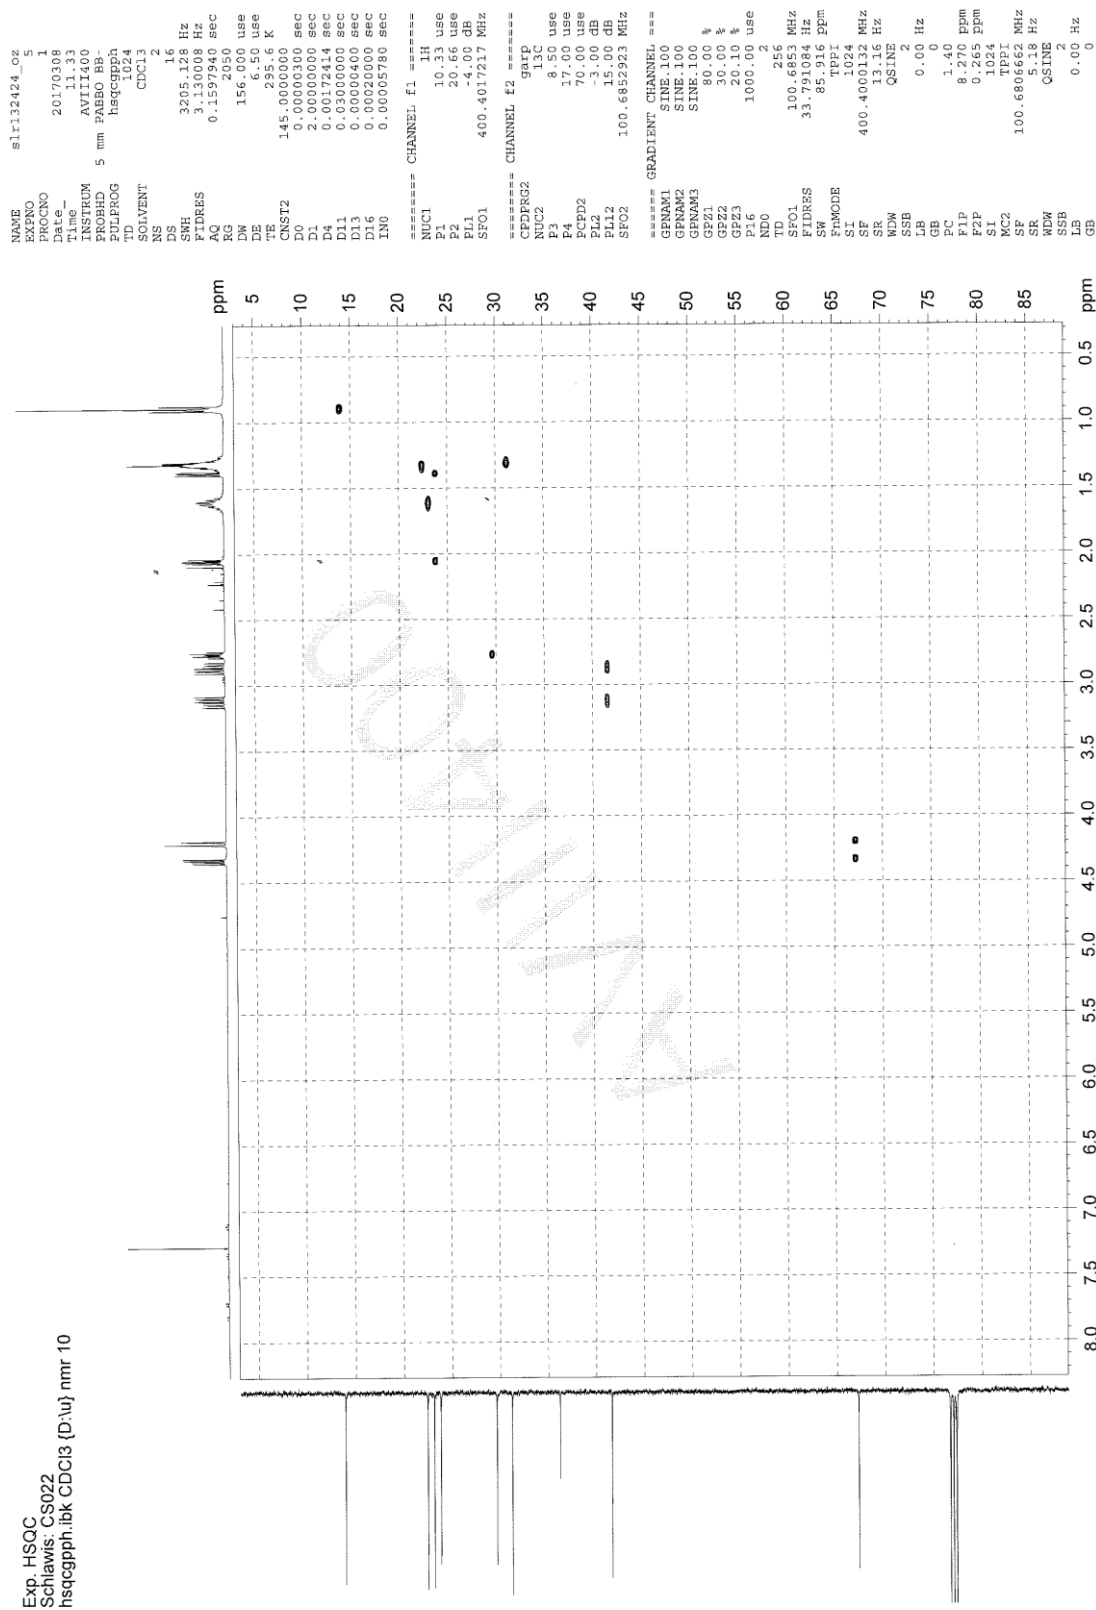

## SUPPORTING INFORMATION

HC-HMBC-NMR spectrum of 1-hexanoyl-3-oxabicyclo[3.1.0]hexan-2-one (**1g**)

```

NAME          #1E132424_02
EXPNO         1
PROCNO        1
Date_         20170308
Time_         11.53
INSTRUM       AVIII400
PROBHD        5 mm PABBO BB-
PULPROG       hmbcgp1pndf
PC1           1024
PC2           1024
SOLVENT       CDCl3
NS            16
DS            8
SWH           3205.128 Hz
FIDRES        3.130008 Hz
AQ            0.1597940 sec
RG            2050
DM            156.000 usec
DE            8.52 usec
TE            283.2 K
===== CHANNEL f1 =====
NUC1          13C
P1            10.33 usec
P2            20.66 usec
PL1           -4.00 dB
SFO1          400.4017217 MHz
===== CHANNEL f2 =====
NUC2          13C
P3            8.50 usec
P4            -3.00 dB
SFO2          100.6915345 MHz
===== GRADIENT CHANNEL =====
GPNAM1        SINE.100
GPNAM2        SINE.100
GPNAM3        SINE.100
GPR1          30.00 %
GPR2          30.00 %
GPR3          40.10 %
P16           1000.00 usec
ND0           2
TD            512
SF01          100.6915 MHz
FIDRES        41.032036 Hz
SWMODE        208.641 Fpm
SI            1024
SF            400.4000132 MHz
SR            13.16 Hz
WDW            SINE
SSB            0
LB            0.00 Hz
GB            0
PC            1.40 usec
F2P           0.265 Fpm
SI            2048
MC2           0F
SF            100.6806662 MHz
SR            5.18 Hz
WDW            SINE
SSB            0
LB            0.00 Hz
GB            0

```

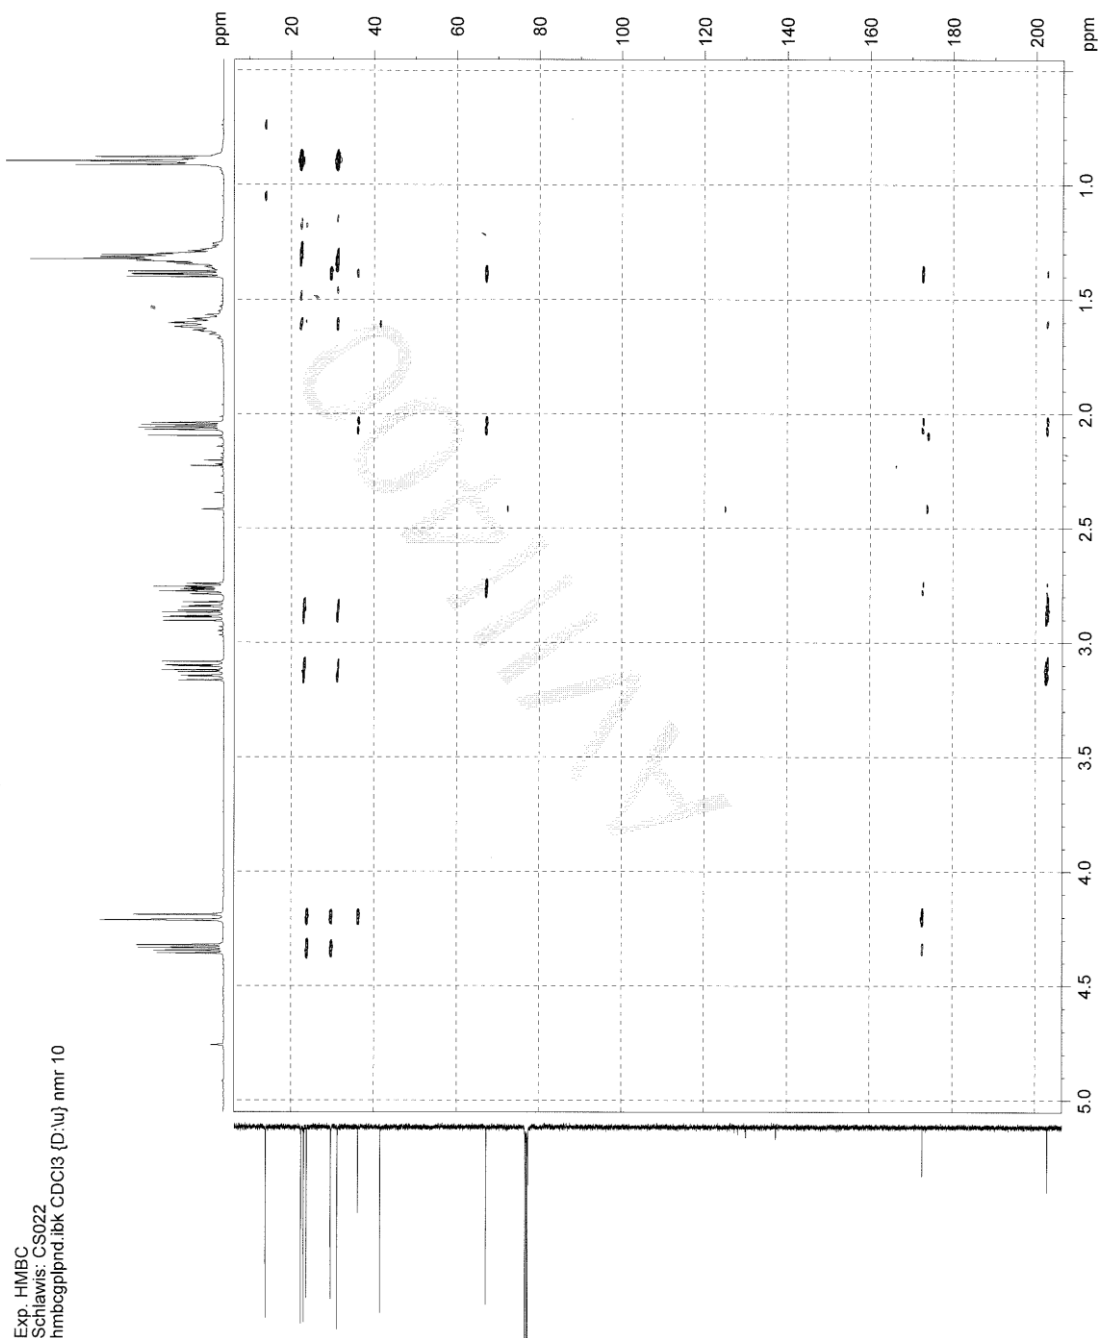



## SUPPORTING INFORMATION

<sup>1</sup>H- and <sup>13</sup>C-NMR spectra of 1-(4-methylhexanoyl)-3-oxabicyclo[3.1.0]hexan-2-one (**1h**)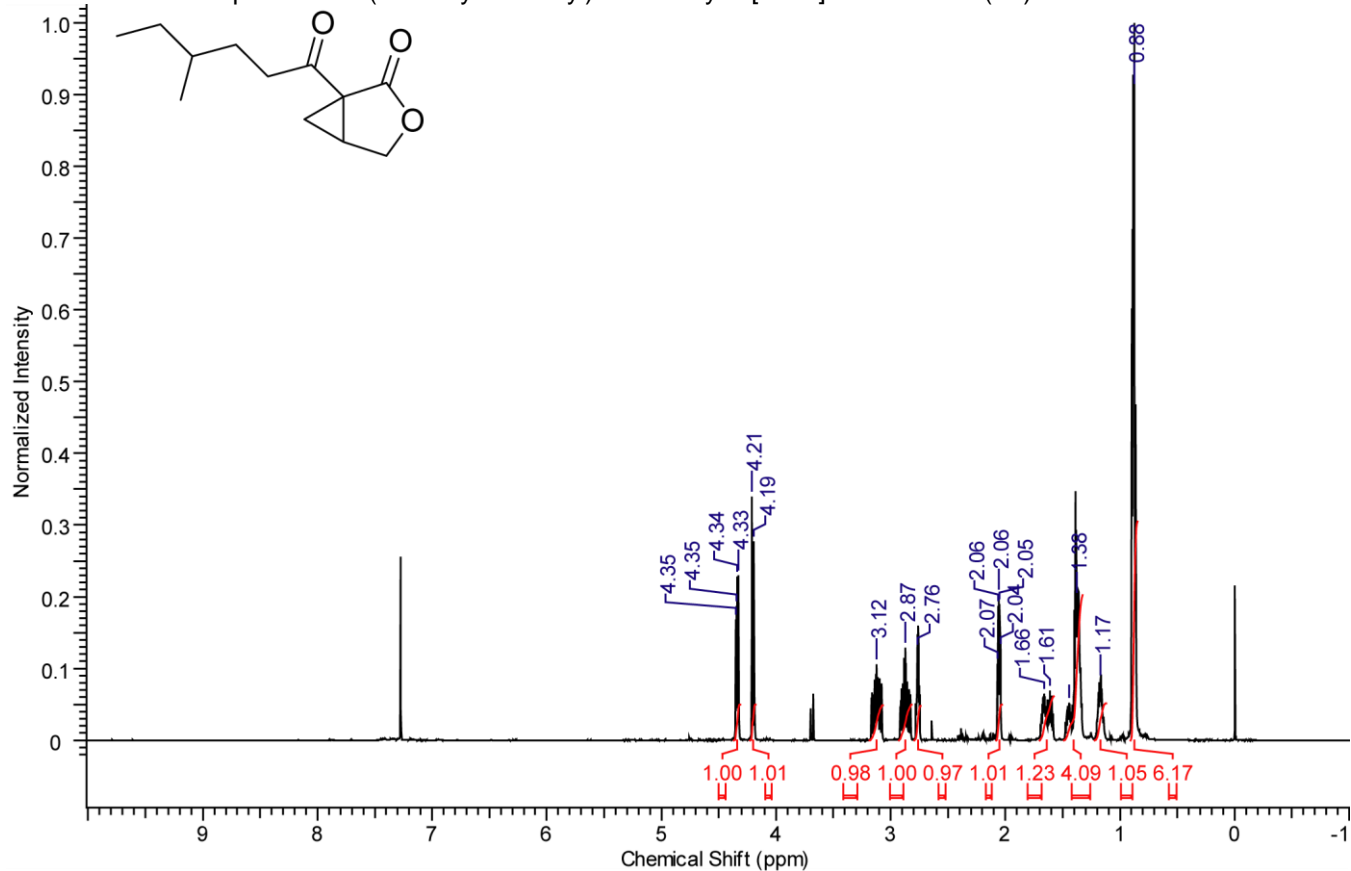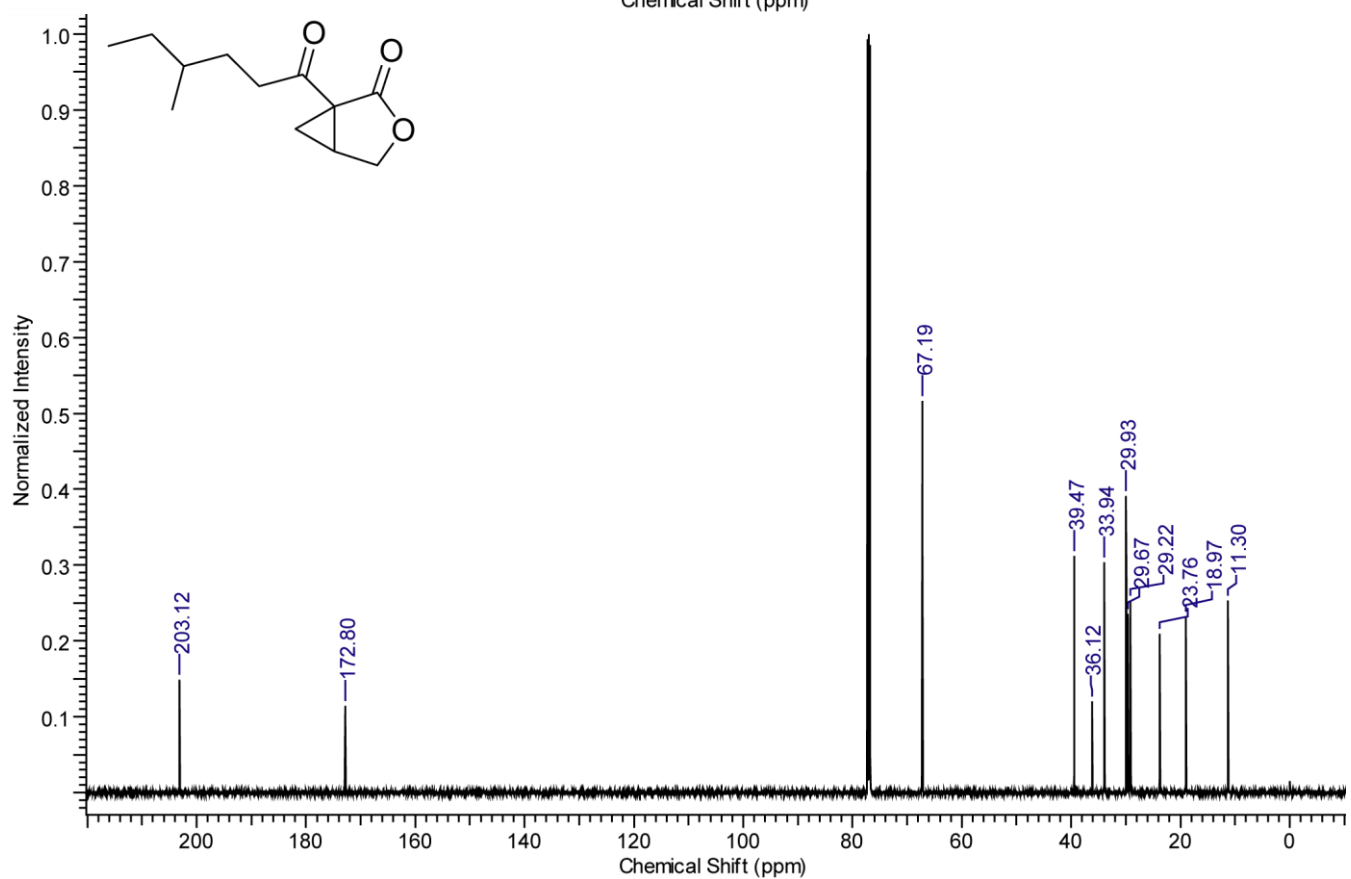

## SUPPORTING INFORMATION

HC-HSQC-NMR spectrum of 1-(4-methylhexanoyl)-3-oxabicyclo[3.1.0]hexan-2-one (**1h**)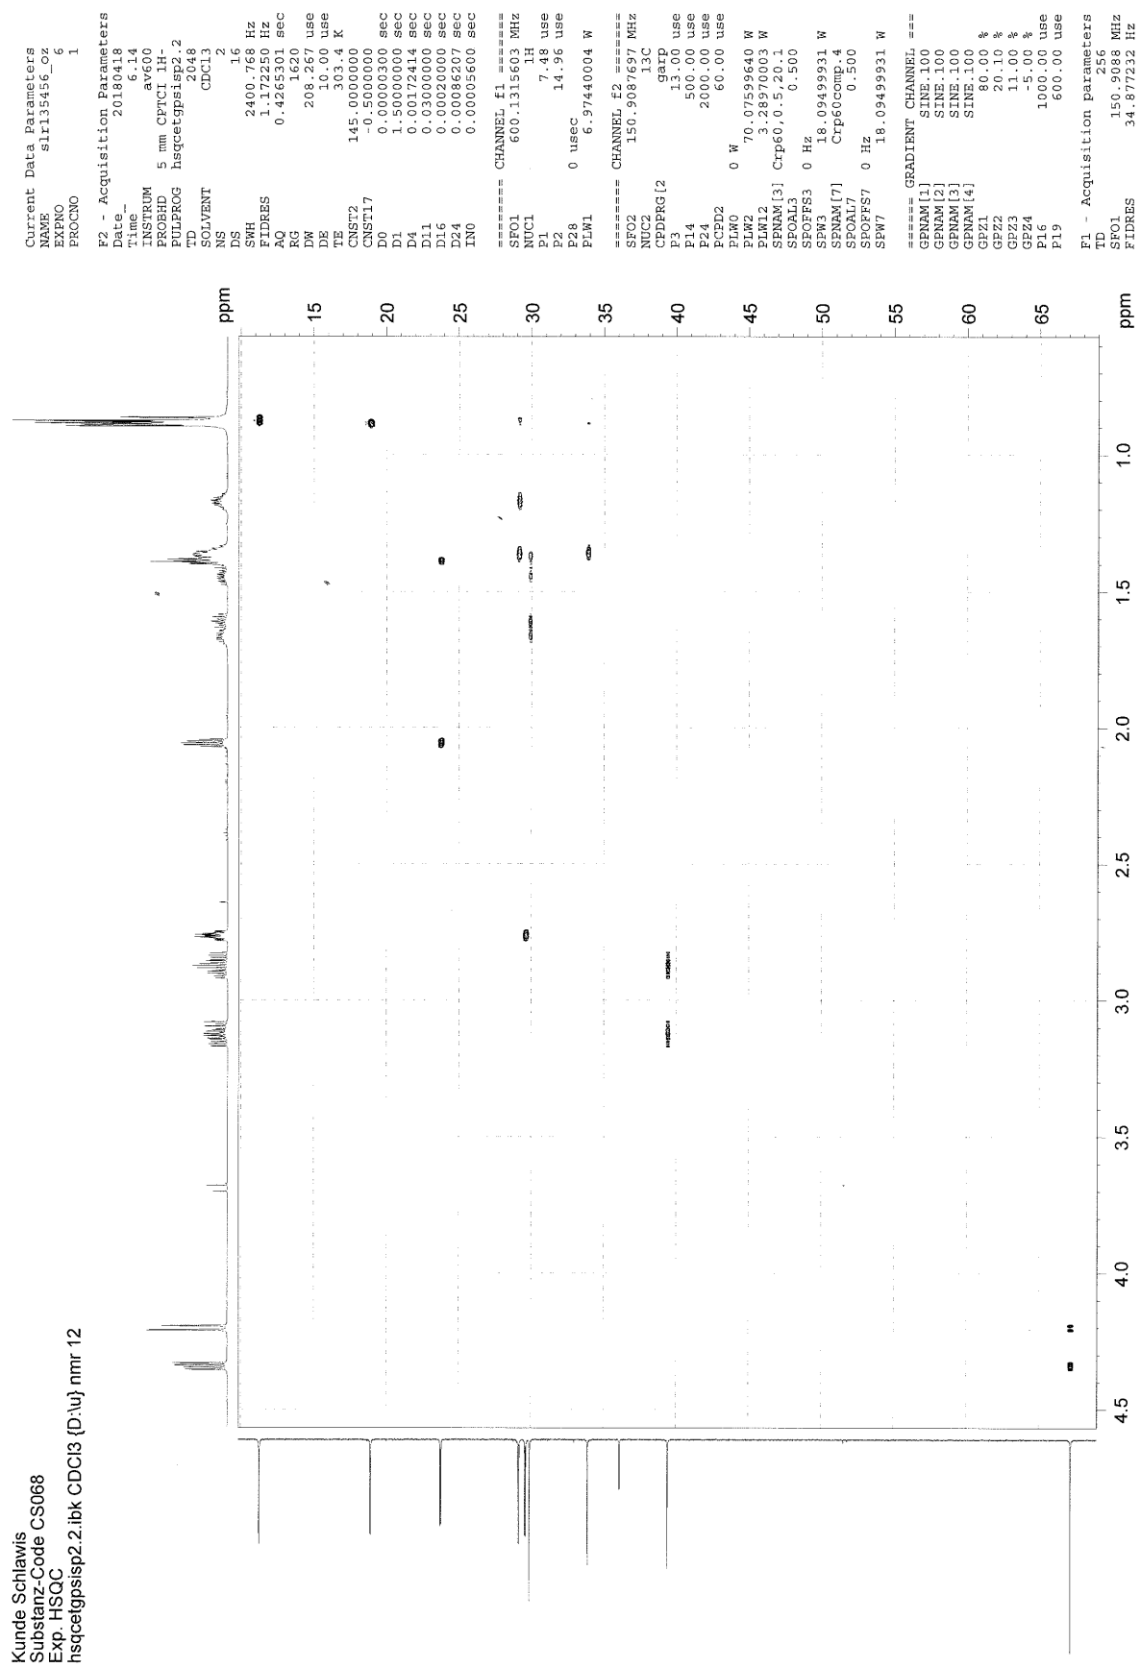

## SUPPORTING INFORMATION

HC-HMBC-NMR spectrum of 1-(4-methylhexanoyl)-3-oxabicyclo[3.1.0]hexan-2-one (**1h**)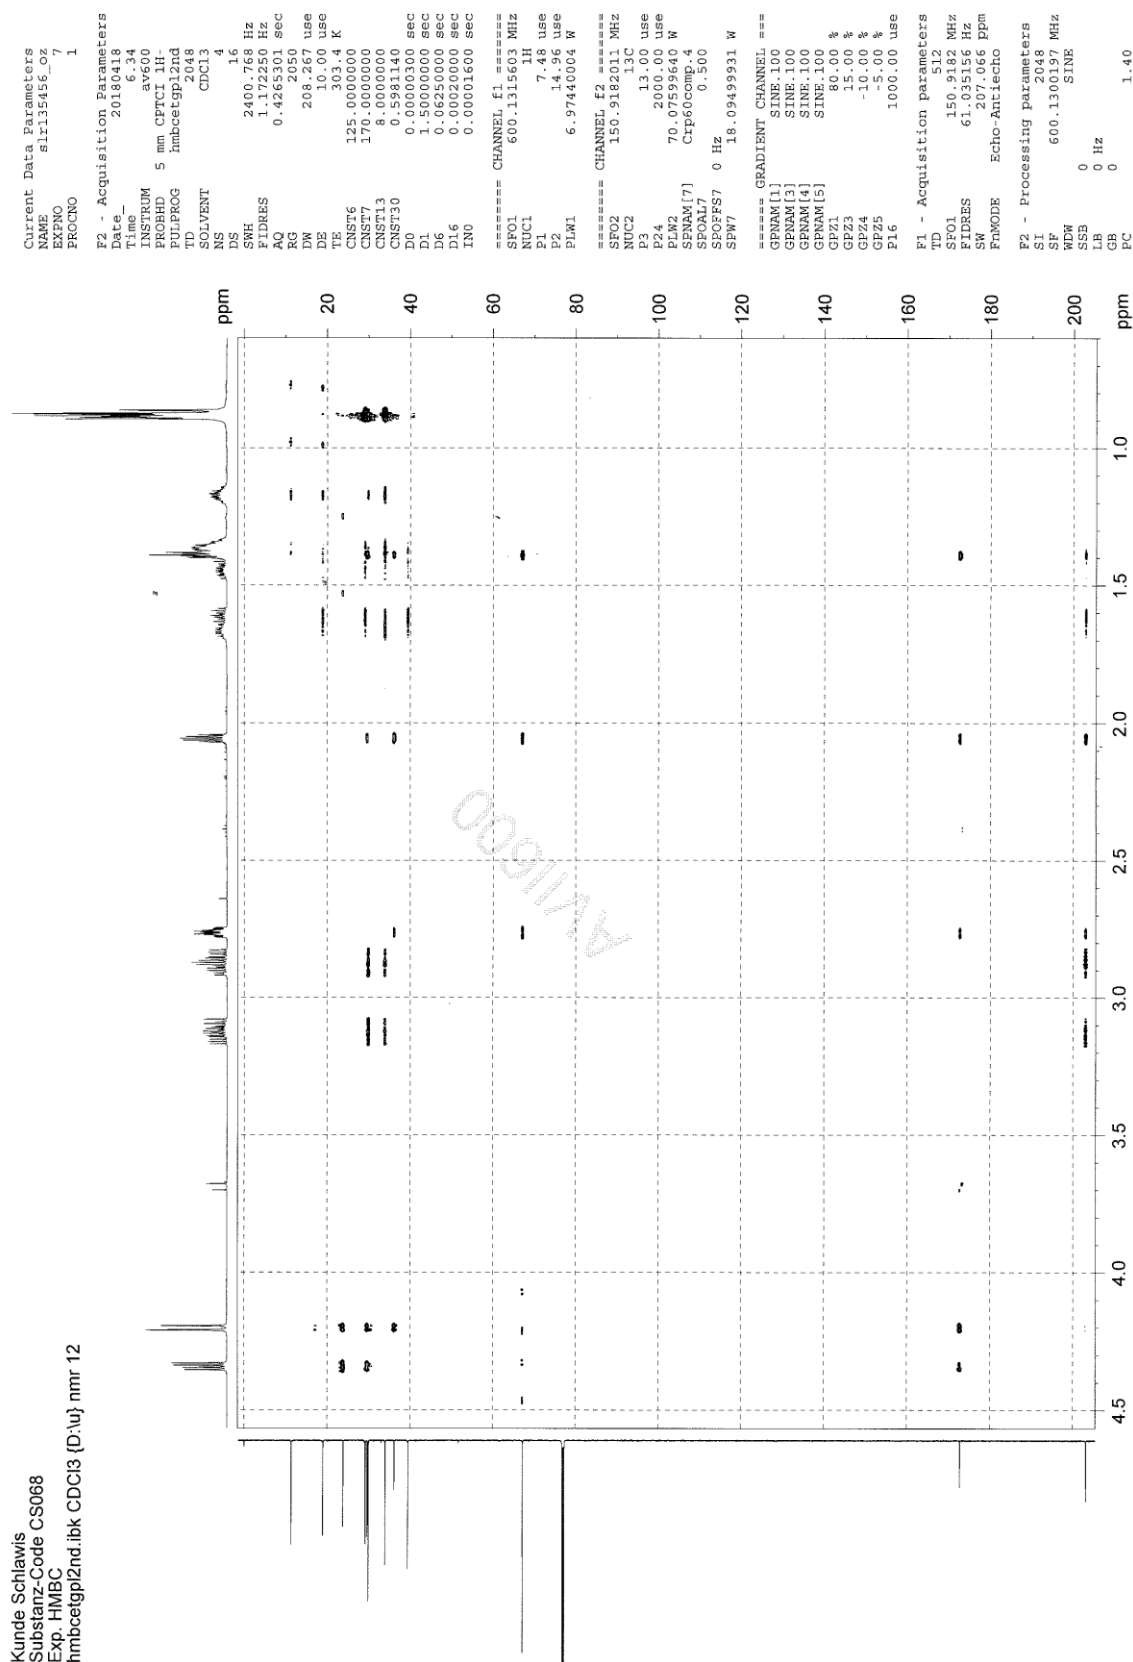

## SUPPORTING INFORMATION

<sup>1</sup>H- and <sup>13</sup>C-NMR spectra of 1-(5-methylhexanoyl)-3-oxabicyclo[3.1.0]hexan-2-one (**1i**)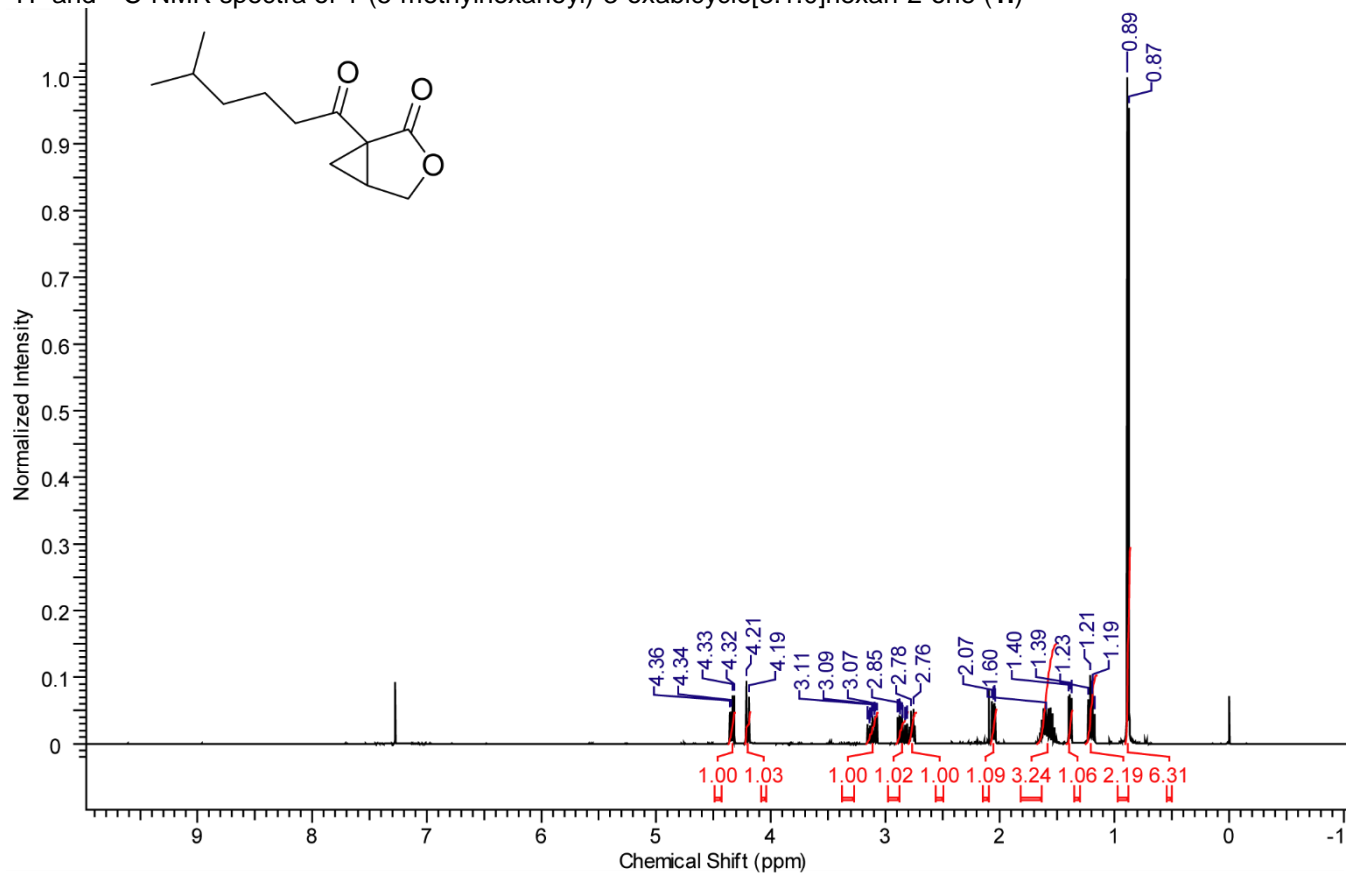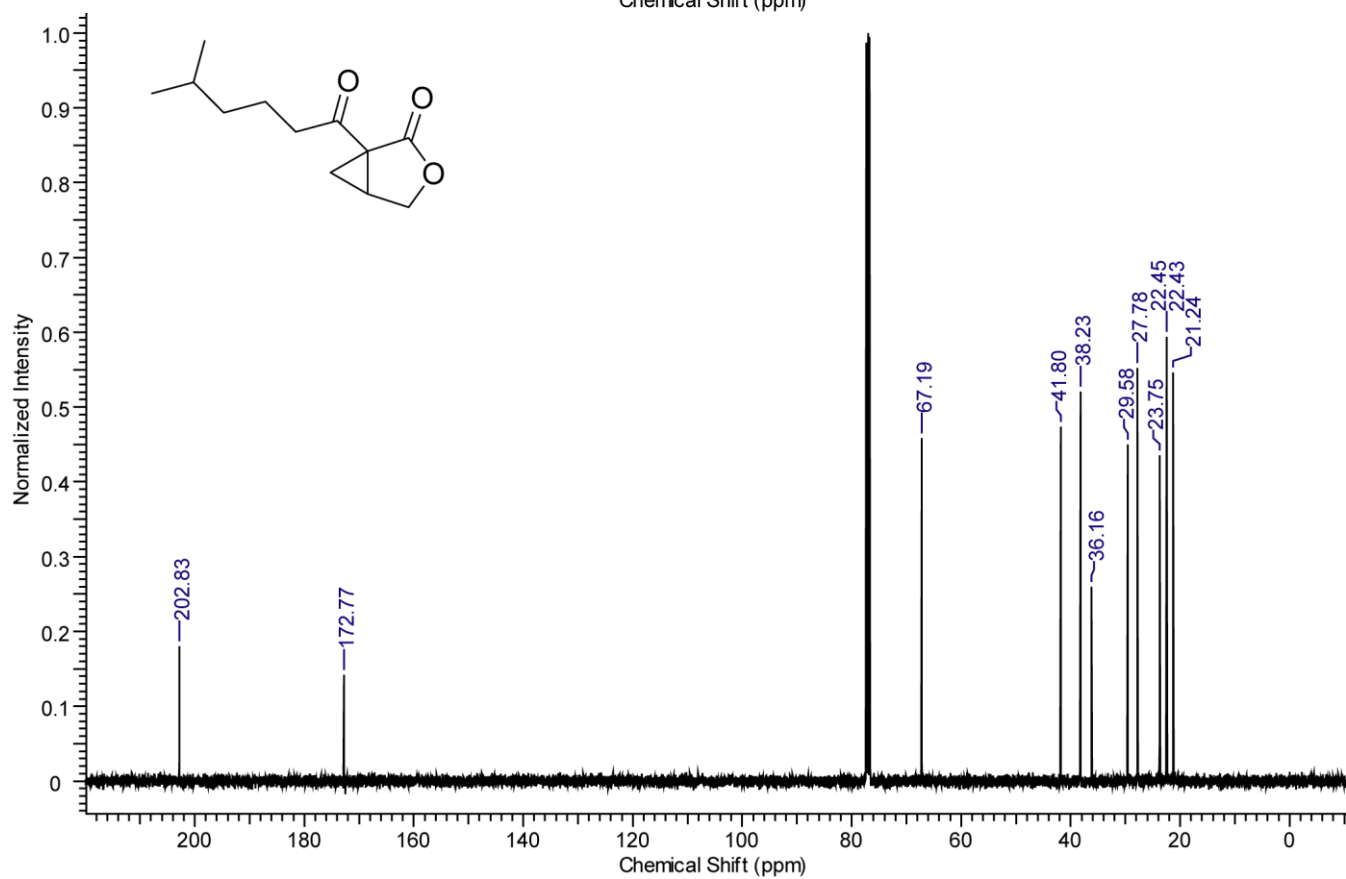

## SUPPORTING INFORMATION

HC-HSQC-NMR spectrum of 1-(5-methylhexanoyl)-3-oxabicyclo[3.1.0]hexan-2-one (**1i**)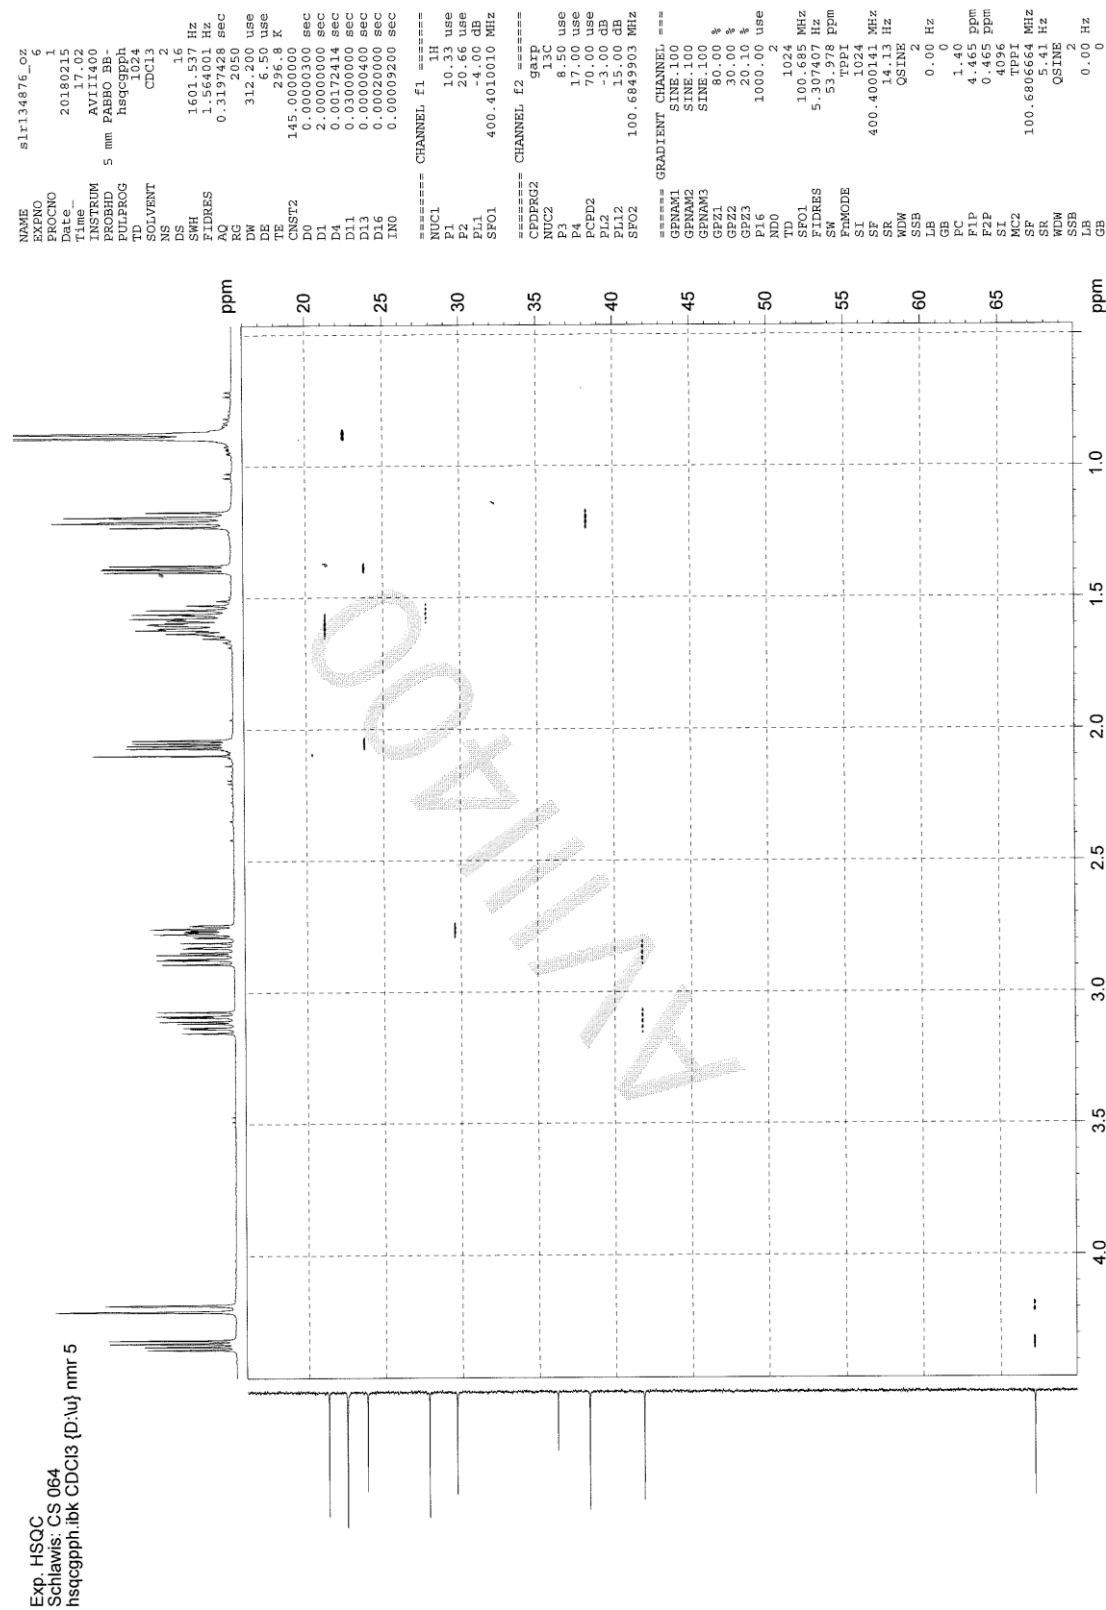

## SUPPORTING INFORMATION

HC-HMBC-NMR spectrum of 1-(5-methylhexanoyl)-3-oxabicyclo[3.1.0]hexan-2-one (**1i**)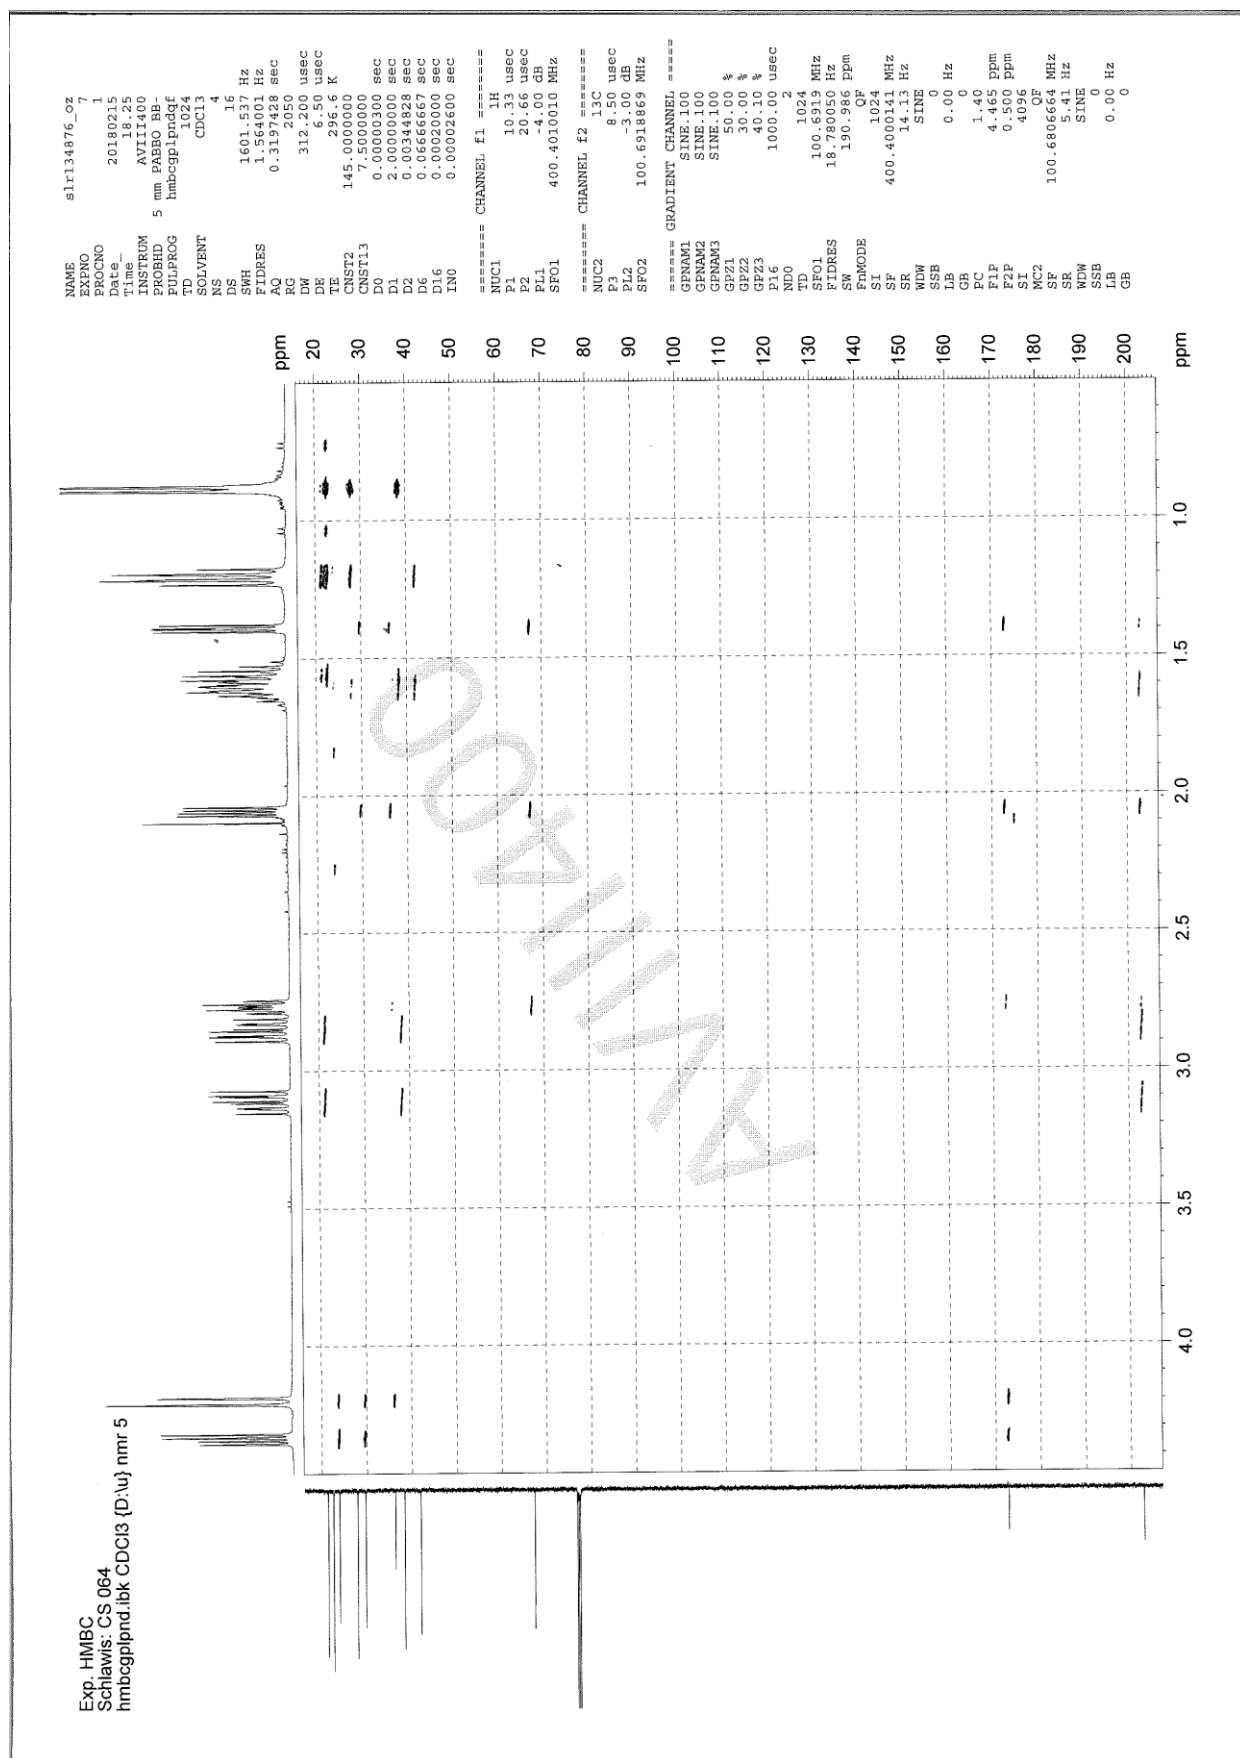

SUPPORTING INFORMATION

---

**Part 5: References**

- [S1] C. Schlawis, S. Kern, Y. Kudo, J. Grunenberg, B. S. Moore, S. Schulz, *Angew. Chem. Int. Ed.* **2018**, *57*, 14921–14925.
- [S2] D. J. Finney, *Probit Analysis, 3rd edn, 333 pp*, Cambridge University Press, Cambridge, **1971**.
- [S3] W. N. Smith, O. F. Beumel jr., *Synthesis* **1974**, 441–443.
- [S4] D. A. Rooke, E. M. Ferreira, *Angew. Chem. Int. Ed.* **2012**, *51*, 3225–3230.
- [S5] X. Fang, C. Li, X. Tong, *Chem. Commun.* **2009**, 5311–5313.
- [S6] L. L. Welbes, T. W. Lyons, K. A. Cychosz, M. S. Sanford, *J. Am. Chem. Soc.* **2007**, *129*, 5836–5837.
- [S7] P. E. Sonnet, *Synth. Commun.* **1976**, *6*, 21–26.
